# Supplementary material for: On the mechanism of carboxylate elimination from carbohydrate monoester-derived radicals
Source: Royal Society of Chemistry journal article supplement (doi:10.1039/d4ob00241e), 2024-01-01
Supplement: d4ob00241e1.pdf [file d4ob00241e1.pdf]

## **On the mechanism of carboxylate elimination from carbohydrate monoester-derived radicals**

### **Supporting Information**

Julia A. Turner<sup>a</sup>, Hendrik Zipse<sup>b\*</sup> and Mark S. Taylor<sup>a\*</sup>

zipse@cup.uni-muenchen.de, mtaylor@chem.utoronto.ca

*<sup>a</sup>Department of Chemistry, University of Toronto, 80 St. George St., Toronto, ON M5S 3H6,  
Canada*

*<sup>b</sup>Department Chemie, Ludwig-Maximilians-Universität München, Butenandtstrasse 5-13, 81377 München,  
Germany*

## Table of Contents

|                                                       |            |
|-------------------------------------------------------|------------|
| <b>1.0 Computational Information</b>                  | <b>S4</b>  |
| <b>2.0 Reaction Pathways</b>                          | <b>S5</b>  |
| <b>3.0 Solvent Effects and Benchmarking</b>           | <b>S8</b>  |
| <b>4.0 Evaluation of Leaving groups</b>               | <b>S27</b> |
| 4.1 Pivaloyl                                          | S27        |
| 4.2 Benzoyl                                           | S32        |
| 4.3 Chloromethyl                                      | S37        |
| 4.5 Trifluoromethyl                                   | S49        |
| 4.6 Tosyl                                             | S54        |
| <b>5.0 Calculated Relative <math>pK_a</math> Data</b> | <b>S61</b> |
| <b>6.0 Experimental Results</b>                       | <b>S65</b> |
| 6.1 General Information                               | S65        |
| 6.2 Preparation of Substrates                         | S66        |
| 6.3 Intramolecular Competition Experiments            | S71        |
| 6.4 NMR Spectra                                       | S77        |
| <b>7.0 Calculated Structures</b>                      | <b>S89</b> |
| 7.1 Acetyl                                            | S89        |
| 7.2 Pivaloyl                                          | S99        |
| 7.3 Benzoyl                                           | S112       |
| 7.4 Chloromethyl                                      | S125       |
| 7.5 Trichloromethyl                                   | S134       |

|                                  |             |
|----------------------------------|-------------|
| <i>7.6 Trifluoromethyl</i> ..... | <b>S143</b> |
| <i>7.7 Tosyl</i> .....           | <b>S152</b> |
| <b>8.0 References</b> .....      | <b>S163</b> |

## 1.0 Computational Information

Geometry optimizations of all species have been performed with the (U)M06-2X functional suitable for open shell systems in combination with the def2-TZVP basis set.<sup>1-3</sup> Gas phase free energies ( $G_{298,qh}$ ) with quasi-harmonic corrections (cutoff: 100 cm<sup>-1</sup>) and a scaling factor of 0.971 for harmonic frequencies were calculated using GoodVibes v3.0.1<sup>4</sup> and refer to a standard state of 1 atm. Solution phase results were calculated at the SMD(AcCN)/(U)M06-2X/def2-TZVP level of theory.<sup>5</sup> Free energies in solution have been corrected to the standard state of 1 mol/l by addition of +7.908 kJ/mol. The NPA charge parameters have been computed with Gaussian 16, rev. A.3, using the build-in NBO 3.1 program. Conformational searching was performed on Schrödinger's Maestro software.<sup>6</sup> Relative energies are computed relative to the most stable conformer in the conformational stack of energies. For each model system used, a full conformational analysis has been performed for the closed-shell reference system (ex, Ac-I-H, Piv-I-H, etc) and radical conformers have been generated after formal H abstraction.

For benchmarking studies single point energies were calculated using DLPNO-CCSD(T)/CBS(cc-pVTZ/cc-pVQZ) level of theory (ORCA),<sup>7</sup> ROB2PLYP-D3/cc-pVTZ, and G3B3 based on (U)M06-2X/def2-TZVP geometries.

### details for correction of enthalpies and free energies with GoodVibes 3.0.1

for gas phase calculations and gas phase standard state of 1 atm:

```
python -m goodvibes <file>.log > <file>.qh  
# cutoff: 100 cm-1; scaling factor: 0.971; use Grimme entropic qh treatment
```

for solution phase calculations and solution phase standard state of 1 mol/l:

```
python -m goodvibes -c 1.0 <file>.log > <file>.qh  
# cutoff: 100 cm-1; scaling factor: 0.971; use Grimme entropic qh treatment;  
# add entropy correction of +7.908 kJ/mol or +1.89 kcal/mol or +0.003012 Hartree.
```

## 2.0 Reaction Pathways

Following earlier theoretical studies<sup>8</sup> on small model systems, and more recent studies<sup>9</sup> on systems closely similar to carbohydrate radical substrates, acyloxy group migration reactions in model substrate **Ac-I** can, in principle, involve the reaction pathways outlined in Scheme S01. Starting from radical **Ac-I**, a stepwise pathway for formation of product radical **Ac-III** can lead through cyclic intermediate **Ac-II** together with the associated transition states for ring closure (**Ac-TS1a**) and ring opening (**Ac-TS1b**). The same product radical **Ac-III** can also be formed through the concerted (single step) pathways involving either the three-membered ring transition state **Ac-TS3** or the five-membered ring transition state **Ac-TS2**. In addition to acyloxy group migration we may also expect acetic acid elimination from radical **1** through transition states such as **Ac-TS4** or **Ac-TS5**. A final pathway involves C-O bond heterolysis to acetate (**Ac-VIII**) and radical cation **VII**, whose interchange of the hydroxyl group proton also leads to product complex **Ac-IV** and (ultimately) radical **V** and acetic acid (**Ac-VI**).

Gas phase results obtained at the (U)M06-2X/def2-TZVP level of theory as summarized in Table S01 and illustrated in Scheme S01 indicate that acyloxy group migration from **Ac-I** to **Ac-III** is without notable driving force ( $\Delta G_{298} = +0.6$  kJ/mol). The most facile pathway for this rearrangement involves 5-membered ring transition state **Ac-TS2** with a barrier of  $\Delta G_{298} = +86.3$  kJ/mol. This is substantially less than the stepwise ring-closure/ring-opening sequence through **Ac-TS1a** with a barrier of  $\Delta G_{298} = +133.0$  kJ/mol. Transition state **Ac-TS2** is significantly polarized as indicated by the charge of the migrating acyloxy group of  $-0.55e$  (Figure S01). A much lower barrier of only  $\Delta G_{298} = +28.4$  kJ/mol is found for elimination of acetic acid through transition state **Ac-TS5** that is exergonic by  $\Delta G_{298} = -46.4$  kJ/mol. Formation of the same products (radical **V** and acetic acid (**Ac-VI**)) through C-O bond heterolysis and the formation of radical cation **VII** and acetate **Ac-VIII** is, at least in the gas phase, much less favorable.

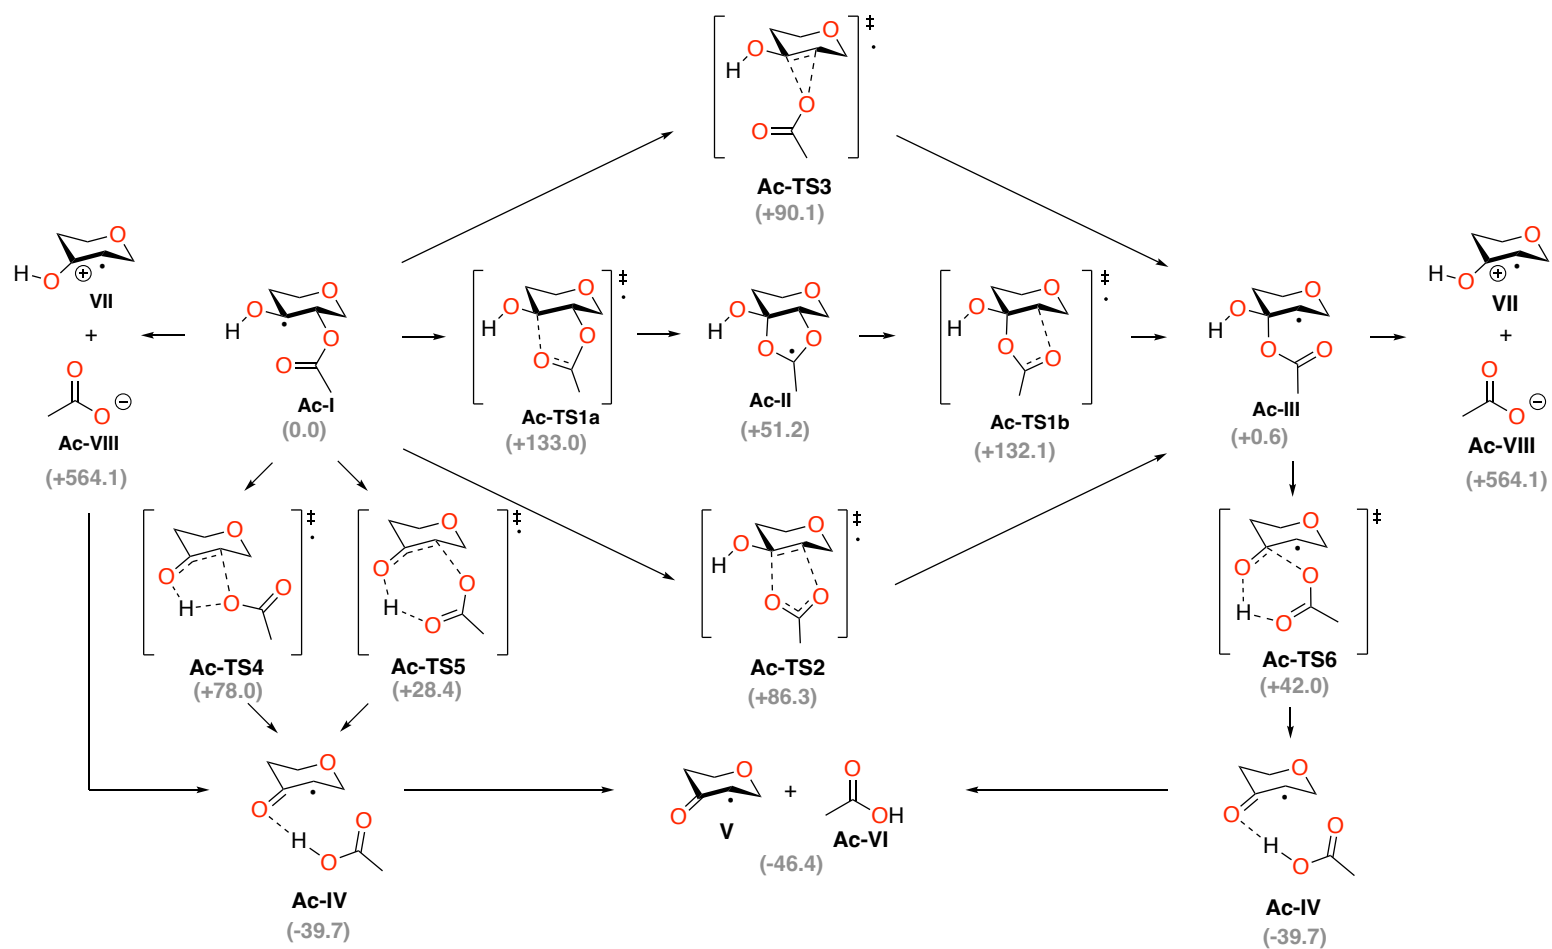

**Scheme S01.** Acyloxy group migration and elimination pathways for model substrate **Ac-I**. Gas phase Gibbs free energy differences ( $\Delta G_{298}$ ) relative to radical **Ac-I** ((U)M06-2X/def2-TZVP results in kJ/mol) are given in brackets.

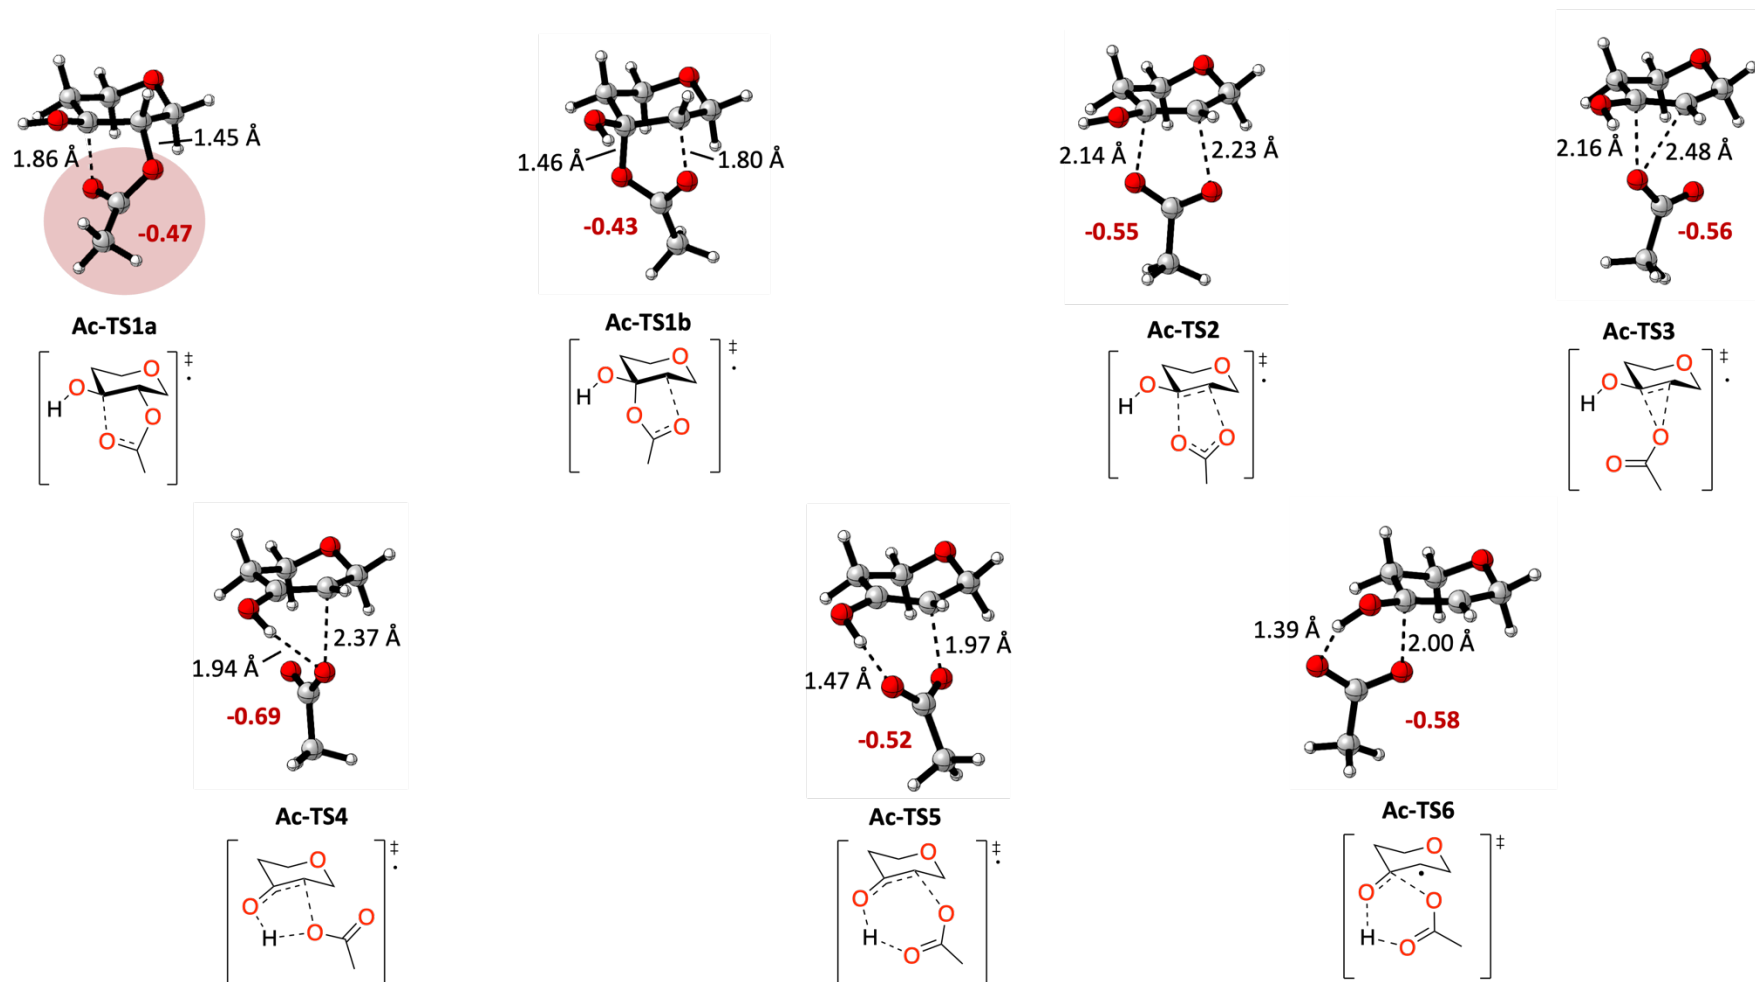

**Figure S01.** Selected transition states for the reactions shown in Scheme S01 (gas phase (U)M06-2X/def2-TZVP results). Acyloxy group ( $-\text{O}_2\text{CCH}_3$ ) charges are shown in red type (NPA/(U)M06-2X/def2-TZVP results) and distances are shown in Angstrom ( $\text{\AA}$ ).

### 3.0 Solvent Effects and Benchmarking

The influence of acetonitrile as a bulk solvent can be assessed through addition of solvation free energies with aid of the SMD continuum solvation model and a standard state of 1 mol/l. Reaction free energies calculated in this manner deviate surprisingly little from the gas phase free energies discussed before (Table S01/Scheme S01). The largest difference is, as expected, seen for the energetics of ions **VII** and **Ac-VIII**, whose formation is now endergonic by only 79.4 kJ/mol (as compared to +564.1 kJ/mol in the gas phase). The energetically most favorable pathway still involves elimination of acetate through transition state **Ac-TS5** with a barrier of +26.9 kJ/mol. From the 1,2-acyloxy group migration pathways it is now 3-membered ring transition state **Ac-TS3** that is preferred.

Reoptimizing all ground and transition states at the SMD(AcCN)/(U)M06-2X/def2-TZVP level of theory we find very similar reaction energies as obtained already with the single point SMD approach (Table S01). For the 1,2-acyloxy group migration reaction transition states **Ac-TS2** and **Ac-TS3** continue to be quite close at around 70 kJ/mol, and elimination of acetate through **Ac-TS5** again shows the lowest overall barrier at +28.0 kJ/mol. Given this rather low barrier we must conclude that the chemistry of radical **Ac-I** will be dominated by acetic acid elimination and rapid formation of radical **V** unless an extraordinarily fast bimolecular process traps radical **Ac-I** (e.g. by hydrogen atom transfer).



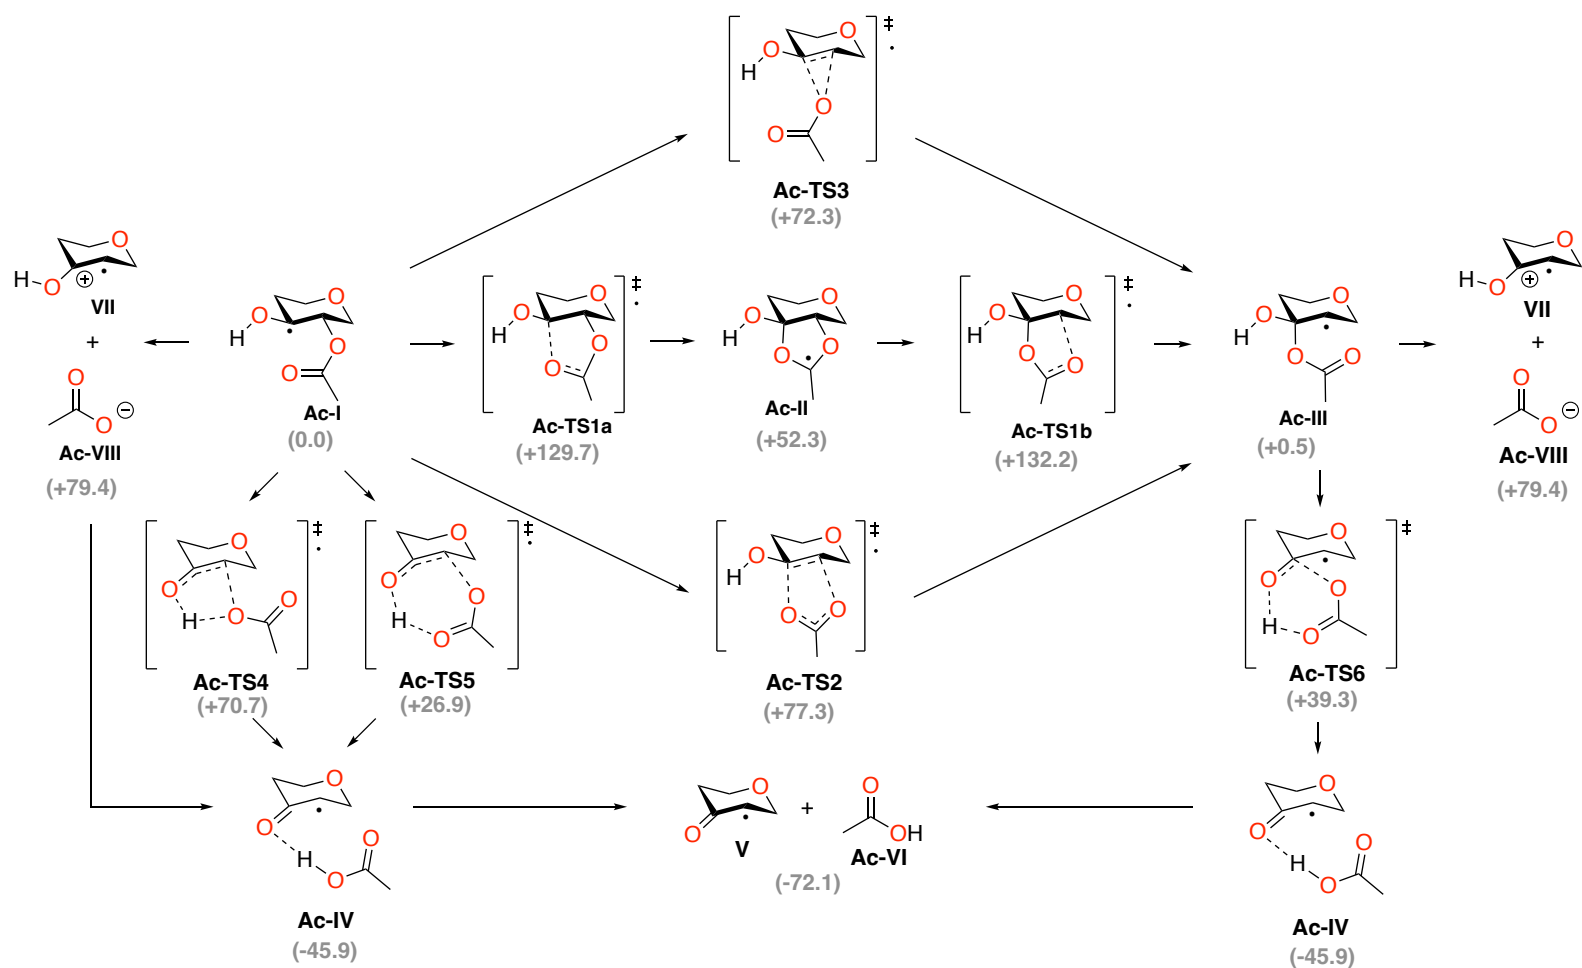

**Scheme S02.** Acyloxy group migration and elimination pathways for model substrate **Ac-I**. Gibbs free energy differences ( $\Delta G_{298,qh,sol}$ ) relative to radical **Ac-I** (UM06-2X/def2-TZVP//SMD(acetonitrile) results in kJ/mol) are given in brackets.

Benchmarking studies were conducted by calculating single point energies for species in Scheme S01 at ROB2PLYP-D3/cc-pVTZ, DLPNO-CCSD(T)/CBS, and G3B3 levels of theory. These results vary little from those calculated at (U)M06-2X/def2-TZVP with single point energies in acetonitrile (Table S01).

**Table S01.** Summary of reaction energies for the species shown in Scheme S01 (in kJ/mol).<sup>[a]</sup>

| System               | $\Delta H_{298}^{[b]}$<br>((U)M06-2X/<br>def2-TZVP) | $\Delta G_{298,qh}^{[b]}$<br>((U)M06-2X/<br>def2-TZVP) | $\Delta G_{298,qh,sol}^{[b]}$<br>((U)M06-2X/<br>def2-TZVP) | $\Delta G_{298,qh,sol}^{[c]}$<br>((U)M06-2X/<br>def2-TZVP) | $\Delta G_{298}^{[b]}$<br>(ROB2PLYP-<br>D3/cc-pVTZ) | $\Delta G_{298}^{[b]}$<br>(DLPNO-<br>CCSD(T)/CBS) | $\Delta G_{298,qh,sol}^{[b]}$<br>(DLPNO-<br>CCSD(T)/CBS) | $\Delta G_{298}^{[b]}$<br>(G3B3) |
|----------------------|-----------------------------------------------------|--------------------------------------------------------|------------------------------------------------------------|------------------------------------------------------------|-----------------------------------------------------|---------------------------------------------------|----------------------------------------------------------|----------------------------------|
| <b>Ac-I</b>          | 0.0                                                 | 0.0                                                    | 0.0                                                        | 0.0                                                        | 0.0                                                 | 0.0                                               | 0.0                                                      | 0.0                              |
| <b>Ac-TS1a</b>       | +127.9                                              | +133.0                                                 | +129.7                                                     | +129.8                                                     | +127.5                                              | +129.9                                            | +126.6                                                   | +122.3                           |
| <b>Ac-II</b>         | +43.8                                               | +51.2                                                  | +52.3                                                      | +53.0                                                      | +66.0                                               | +50.6                                             | +52.2                                                    | +47.1                            |
| <b>Ac-TS1b</b>       | +125.5                                              | +132.1                                                 | +132.2                                                     | +132.0                                                     | +129.3                                              | +127.2                                            | +127.3                                                   | +119.7                           |
| <b>Ac-III</b>        | +0.3                                                | +0.6                                                   | +0.5                                                       | -0.4                                                       | +5.1                                                | +0.4                                              | +0.3                                                     | -3.3                             |
|                      |                                                     |                                                        |                                                            |                                                            |                                                     |                                                   |                                                          |                                  |
| <b>Ac-TS2</b>        | +86.7                                               | +86.3                                                  | +77.3                                                      | +69.4                                                      | +62.3                                               | +85.8                                             | +76.8                                                    | +74.1                            |
| <b>Ac-TS3</b>        | +93.5                                               | +90.1                                                  | +72.3                                                      | +67.3                                                      | +69.3                                               | +93.1                                             | +78.9                                                    | +86.8                            |
|                      |                                                     |                                                        |                                                            |                                                            |                                                     |                                                   |                                                          |                                  |
| <b>Ac-TS4</b>        | +79.6                                               | +78.0                                                  | +70.7                                                      | +67.5                                                      | +59.5                                               | +85.1                                             | +77.8                                                    | +74.3                            |
| <b>Ac-TS5</b>        | <b>+27.7</b>                                        | <b>+28.4</b>                                           | <b>+26.9</b>                                               | <b>+28.0</b>                                               | <b>+9.5</b>                                         | <b>+33.1</b>                                      | <b>+31.5</b>                                             | <b>+29.0</b>                     |
| <b>Ac-TS6</b>        | +41.3                                               | +42.0                                                  | +39.3                                                      | +39.2                                                      | +31.3                                               | +49.0                                             | +45.8                                                    | +43.0                            |
| <b>Ac-IV</b>         | -31.2                                               | -39.7                                                  | -45.9                                                      | -52.6                                                      | -51.4                                               | -41.4                                             | -46.7                                                    | -42.8                            |
| <b>V + Ac-VI</b>     | +10.0                                               | -46.4                                                  | -72.1                                                      | -64.6                                                      | -57.5                                               | -55.2                                             | -80.8                                                    | -49.5                            |
|                      |                                                     |                                                        |                                                            |                                                            |                                                     |                                                   |                                                          |                                  |
| <b>VII + Ac-VIII</b> | +621.6                                              | +564.1                                                 | +79.4                                                      | +89.2                                                      | +556.0                                              | +562.9                                            | +78.3                                                    | +567.0                           |
|                      |                                                     |                                                        |                                                            |                                                            |                                                     |                                                   |                                                          |                                  |

[a] Calculated with reference to the best conformer of each species. [b] Using gas phase (U)M06-2X/def2-TZVP geometries.

[c] Using solution phase SMD(AcCN)/(U)M06-2X/def2-TZVP geometries.

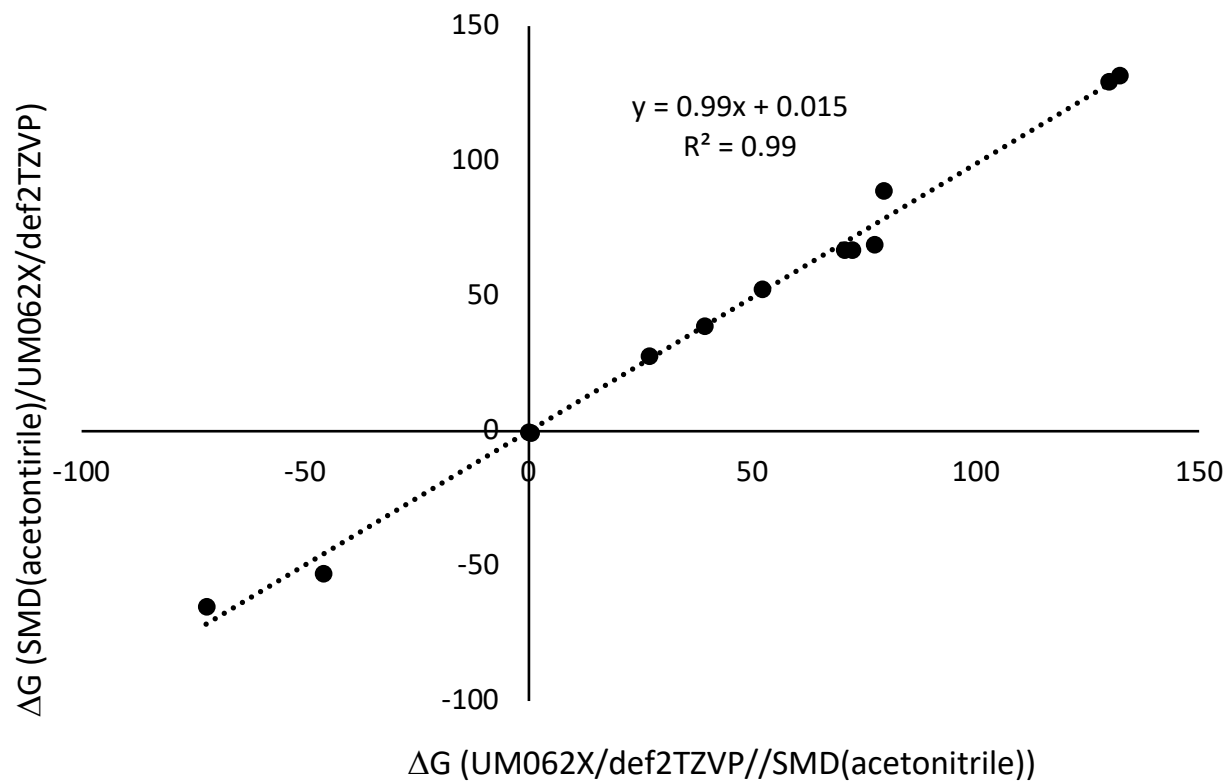

**Figure S02.** Plot of  $\Delta G$  for calculated using (U)M06-2X/def2-TZVP level of theory with gas phase geometry optimization and single point energies at (U)M06-2X/def2-TZVP//SMD(acetonitrile) vs  $\Delta G$  calculated using SMD(acetonitrile)/(U)M06-2X/def2-TZVP level of theory with solution phase geometry optimization for stationary points in Scheme S01.

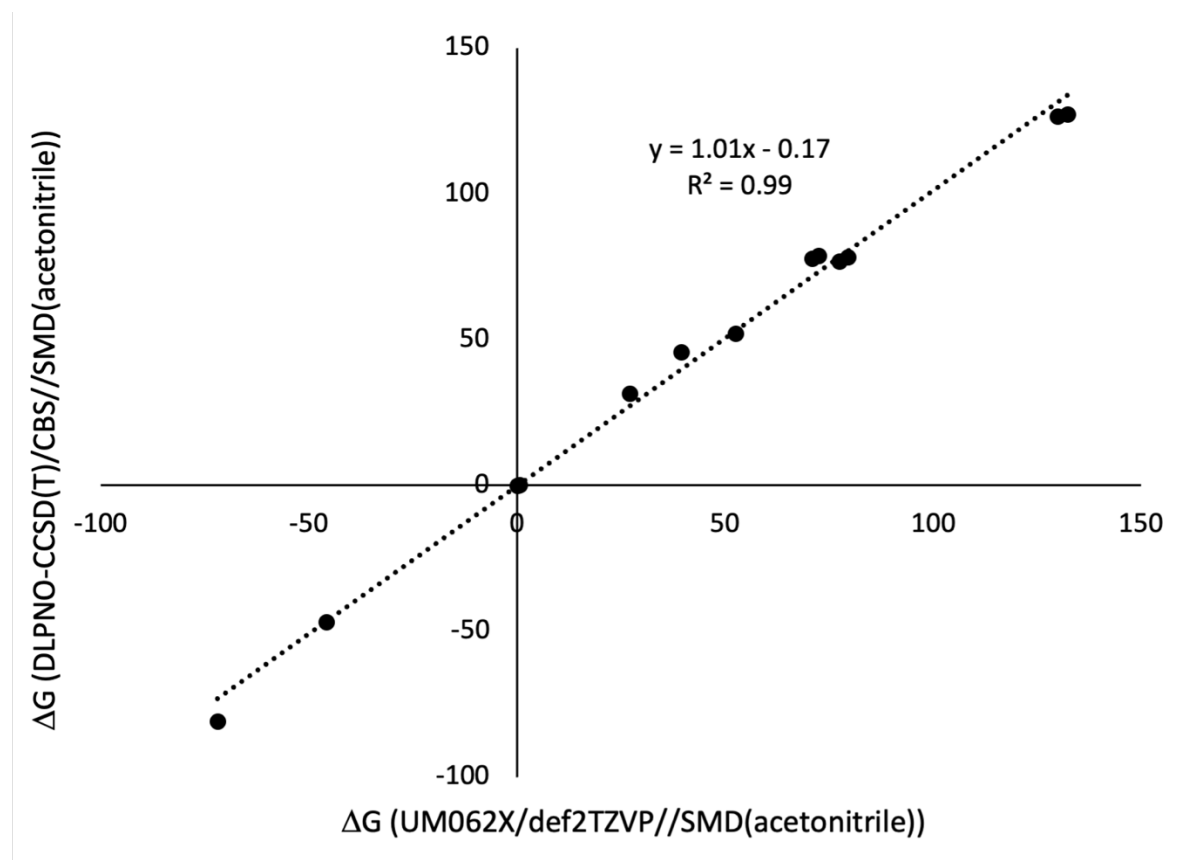

**Figure S03.** Plot of  $\Delta G$  for calculated using (U)M06-2X/def2-TZVP level of theory with gas phase geometry optimization and single point energies at (U)M06-2X/def2-TZVP//SMD(acetonitrile) vs  $\Delta G$  calculated using DLPNO-CCSD(T)/CBS//SMD(acetonitrile) level of theory for stationary points in Scheme S01.

**Table S02.** Energy values for the species shown in Scheme S01 (gas phase (U)M06-2X/def2-TZVP results).

| System         | $E_{tot}$<br>((U)M06-2X/<br>def2-TZVP) | $H_{298}$<br>((U)M06-2X/<br>def2-TZVP)               | $G_{298,qh}$<br>((U)M06-2X/<br>def2-TZVP) | $E_{tot}$<br>(SMD(AcCN)/<br>(U)M06-2X/<br>def2-TZVP) | q(NPA,AcO) | $\Delta G_{298,qh}$<br>((U)M06-2X/<br>def2-TZVP)<br>[kJ/mol] | $\Delta G_{298,qh,sol}$<br>((U)M06-2X/<br>def2-TZVP) <sup>a</sup><br>[kJ/mol] |
|----------------|----------------------------------------|------------------------------------------------------|-------------------------------------------|------------------------------------------------------|------------|--------------------------------------------------------------|-------------------------------------------------------------------------------|
| <b>Ac-I</b>    |                                        |                                                      |                                           |                                                      |            |                                                              |                                                                               |
| aco_024f       | <b>-574.2128353</b>                    | <b>-574.0239376</b>                                  | <b>-574.0727460</b>                       | <b>-574.2270709</b>                                  | -0.3035    | 0.0                                                          | 0.0                                                                           |
| aco_005        | -574.2093757                           | -574.0206377                                         | -574.0698982                              | -574.2250949                                         | -0.3089    | +7.5                                                         | +3.6                                                                          |
| aco_002        | -574.2055086                           | -574.0168421                                         | -574.0663809                              | -574.2236632                                         | -0.2949    | +16.7                                                        | +6.4                                                                          |
| aco_006        | -574.2042959                           | -574.0156706                                         | -574.0649547                              | -574.2207620                                         | -0.3100    | +20.5                                                        | +14.6                                                                         |
| aco_003        | -574.2033567                           | -574.0148340                                         | -574.0641671                              | -574.2204886                                         | -0.2943    | +22.5                                                        | +14.9                                                                         |
|                |                                        |                                                      |                                           |                                                      |            |                                                              |                                                                               |
| <b>Ac-TS1a</b> |                                        |                                                      |                                           |                                                      |            |                                                              |                                                                               |
| aco_014        | <b>-574.1615865</b>                    | <b>-573.9752299</b><br>(imag=-950 cm <sup>-1</sup> ) | <b>-574.0221055</b>                       | <b>-574.1770666</b>                                  | -0.4693    | <b>+133.0</b>                                                | <b>+129.7</b>                                                                 |
| aco_025        | -574.1610416                           | -573.9747270<br>(imag=-937 cm <sup>-1</sup> )        | -574.0215835                              | -574.1761851                                         | -0.5020    | +134.3                                                       | +131.9                                                                        |
|                |                                        |                                                      |                                           |                                                      |            |                                                              |                                                                               |
| <b>Ac-II</b>   |                                        |                                                      |                                           |                                                      |            |                                                              |                                                                               |
| aco_015r       | <b>-574.1965273</b>                    | <b>-574.0072482</b>                                  | <b>-574.0532410</b>                       | -574.2099272                                         | -0.5516    | +51.2                                                        | +53.4                                                                         |
| aco_012        | -574.1962317                           | -574.0069472                                         | -574.0529055                              | <b>-574.2101639</b>                                  | -0.5502    | +52.1                                                        | +52.9                                                                         |
| aco_008        | -574.1954873                           | -574.0063332                                         | -574.0526034                              | -574.2099443                                         | -0.5350    | +52.9                                                        | <b>+52.3</b>                                                                  |
| aco_026r       | -574.1944476                           | -574.0053106                                         | -574.0515740                              | -574.2094460                                         | -0.5353    | +55.6                                                        | +53.6                                                                         |
| aco_013        | -574.1908903                           | -574.0018311                                         | -574.0484196                              | -574.2072539                                         |            | +63.9                                                        | +58.3                                                                         |
| aco_027        | -574.1900824                           | -574.0011160                                         | -574.0478958                              | -574.2062771                                         |            | +65.2                                                        | +60.1                                                                         |
|                |                                        |                                                      |                                           |                                                      |            |                                                              |                                                                               |
| <b>Ac-TS1b</b> |                                        |                                                      |                                           |                                                      |            |                                                              |                                                                               |
| aco_015        | -574.1619790                           | -573.9761218<br>(imag=-950 cm <sup>-1</sup> )        | -574.0224481                              | -574.1761732                                         | -0.4250    | <b>+132.1</b>                                                | <b>+132.2</b>                                                                 |
| aco_026        | -574.1596395                           | -573.9739862<br>(imag=-1033 cm <sup>-1</sup> )       | -574.0205680                              | -574.1752776                                         | -0.4072    | +137.0                                                       | +133.3                                                                        |

|               |                     |                                                      |                     |                     |         |              |              |
|---------------|---------------------|------------------------------------------------------|---------------------|---------------------|---------|--------------|--------------|
| <b>Ac-III</b> |                     |                                                      |                     |                     |         |              |              |
| aco_016       | <b>-574.2110687</b> | <b>-574.0238378</b>                                  | <b>-574.0725182</b> | -574.2253361        | -0.3484 | +0.6         | <b>+0.5</b>  |
| aco_021f      | -574.2092998        | -574.0221980                                         | -574.0709712        | -574.2234206        | -0.3556 | +4.7         | +5.0         |
| aco_004       | -574.2040081        | -574.0171445                                         | -574.0662997        | -574.2214907        | -0.3308 | +16.9        | +8.4         |
| aco_023r      | -574.2017108        | -574.0146827                                         | -574.0641254        | -574.2176988        |         | +22.6        | +18.0        |
| aco_011r      | -574.2006972        | -574.0137314                                         | -574.0631133        | -574.2163413        |         | +25.3        | +21.6        |
| aco_028f      | -574.1979759        | -574.0111355                                         | -574.0604803        | -574.2150130        |         | +32.2        | +24.8        |
|               |                     |                                                      |                     |                     |         |              |              |
| <b>Ac-TS2</b> |                     |                                                      |                     |                     |         |              |              |
| aco_010       | <b>-574.1769633</b> | <b>-573.9909321</b><br>(imag=-278 cm <sup>-1</sup> ) | <b>-574.0398695</b> | <b>-574.1946458</b> | -0.5509 | <b>+86.3</b> | <b>+77.3</b> |
| aco_028       | -574.1726703        | -573.9867366<br>(imag=-297 cm <sup>-1</sup> )        | -574.0358433        | -574.1911628        | -0.5159 | +96.9        | +85.7        |
|               |                     |                                                      |                     |                     |         |              |              |
| <b>Ac-TS3</b> |                     |                                                      |                     |                     |         |              |              |
|               |                     |                                                      |                     |                     |         |              |              |
| aco_023       | -574.1738495        | <b>-573.9883179</b><br>(imag=-157 cm <sup>-1</sup> ) | <b>-574.0384235</b> | <b>-574.1935054</b> | -0.5589 | <b>+90.1</b> | <b>+75.9</b> |
| aco_011       | -574.1714675        | -573.9854670<br>(imag=-55 cm <sup>-1</sup> )         | -574.0352964        | -574.1928538        | -0.5063 | +98.3        | +79.5        |
|               |                     |                                                      |                     |                     |         |              |              |
| <b>Ac-TS4</b> |                     |                                                      |                     |                     |         |              |              |
| aco_022       | -574.1795821        | -573.9936341<br>(imag=-205 cm <sup>-1</sup> )        | -574.0430295        | -574.1966063        | -0.6923 | +78.0        | +70.7        |
|               |                     |                                                      |                     |                     |         |              |              |
| <b>Ac-TS5</b> |                     |                                                      |                     |                     |         |              |              |
| aco_024       | <b>-574.1989292</b> | <b>-574.0134021</b><br>(imag=-193 cm <sup>-1</sup> ) | <b>-574.0619162</b> | <b>-574.2137499</b> | -0.5242 | +28.4        | +26.9        |
|               |                     |                                                      |                     |                     |         |              |              |
| <b>Ac-TS6</b> |                     |                                                      |                     |                     |         |              |              |

|                     |                     |                                               |                     |                     |         |              |              |
|---------------------|---------------------|-----------------------------------------------|---------------------|---------------------|---------|--------------|--------------|
| aco_021             | -574.1906569        | -574.0074599<br>(imag=-452 cm <sup>-1</sup> ) | -574.0557474        | -574.2060893        | -0.5766 | +44.6        | +41.5        |
| <b>Ac-IV</b>        |                     |                                               |                     |                     |         |              |              |
| aco_021r            | <b>-574.2224544</b> | <b>-574.0358361</b>                           | -574.0878664        | <b>-574.2386047</b> | -0.5518 | <b>-39.7</b> | <b>-44.7</b> |
| aco_022f            | -574.2223135        | -574.0356896                                  | <b>-574.0882660</b> | -574.2384912        | -0.5507 | -40.7        | -45.8        |
| <b>V</b>            |                     |                                               |                     |                     |         |              |              |
| aco_007             | -345.1158220        | -344.9975398                                  | -345.0354352        | -345.1303555        | -       |              |              |
| <b>Ac-VI</b>        |                     |                                               |                     |                     |         |              |              |
| aco_009             | -229.0887384        | -229.0226012                                  | -229.0549932        | -229.0982225        | -0.4923 |              |              |
| <b>V + AcVI</b>     | -574.2045604        | -574.020141                                   | -574.0904284        | -574.228578         | -       | <b>-46.4</b> | <b>-72.1</b> |
| <b>VII</b>          |                     |                                               |                     |                     |         |              |              |
| aco_019             | -345.4496196        | -345.3188634                                  | -345.3569734        | -345.5527916        | -       |              |              |
| <b>Ac-VIII</b>      |                     |                                               |                     |                     |         |              |              |
| aco_018             | -228.5209366        | -228.4683132                                  | -228.5009275        | -228.6165958        | -1.0000 |              |              |
| <b>VII + AcVIII</b> | -573.9705562        | -573.7871766                                  | -573.8579009        | -574.1693874        | -       | +564.1       | +79.4        |

[a] Using gas phase M06-2X/def2-TZVP geometries.

**Table S03.** Energy values for the species shown in Scheme S01 at the SMD(AcCN)/(U)M06-2X/def2-TZVP level of theory.

| System | $E_{tot}$<br>(SMD(AcCN)/ | $H_{298}$<br>(SMD(AcCN)/ | $G_{298,qh}$<br>(SMD(AcCN)/ | $\Delta G_{298,qh}$<br>(SMD(AcCN)/ |
|--------|--------------------------|--------------------------|-----------------------------|------------------------------------|
|--------|--------------------------|--------------------------|-----------------------------|------------------------------------|

|                | (U)M06-2X/<br>def2-TZVP) | (U)M06-2X/<br>def2-TZVP)                              | (U)M06-2X/<br>def2-TZVP) | (U)M06-2X/<br>def2-TZVP)<br>[kJ/mol] |
|----------------|--------------------------|-------------------------------------------------------|--------------------------|--------------------------------------|
| <b>Ac-I</b>    |                          |                                                       |                          |                                      |
| aco_024fsol    | <b>-574.2272928</b>      | <b>-574.0390635</b>                                   | <b>-574.0848058</b>      | 0.0                                  |
| aco_023sol     | -574.2211109             | -574.0331646                                          | -574.0794205             | +14.1                                |
| aco_022solr    | -574.2210470             | -574.0330286                                          | -574.0792833             | +14.5                                |
| aco_014solr    | -574.2208350             | -574.0327621                                          | -574.0790434             | +15.1                                |
| aco_028solr    | -574.2201426             | -574.0322116                                          | -574.0785821             | +16.3                                |
|                |                          |                                                       |                          |                                      |
| <b>Ac-TS1a</b> |                          |                                                       |                          |                                      |
| aco_014sol     | <b>-574.1772364</b>      | <b>-573.9914380</b><br>(imag=-985 cm <sup>-1</sup> )  | <b>-574.0353714</b>      | <b>+129.8</b>                        |
| aco_025sol     | -574.1764948             | -573.9908689<br>(imag=-992 cm <sup>-1</sup> )         | -574.0347166             | +131.5                               |
|                |                          |                                                       |                          |                                      |
| <b>Ac-II</b>   |                          |                                                       |                          |                                      |
| aco_025sol     | -574.2103614             | -574.0216902                                          | -574.0645866             | +53.1                                |
| aco_014sol     | -574.2102243             | -574.0215528                                          | -574.0646078             | <b>+53.0</b>                         |
| aco_015solr    | -574.2101209             | -574.0213791                                          | -574.0644223             | +53.5                                |
| aco_026solr    | -574.2099147             | -574.0212272                                          | -574.0642907             | +53.9                                |
|                |                          |                                                       |                          |                                      |
| <b>Ac-TS1b</b> |                          |                                                       |                          |                                      |
| aco_015sol     | <b>-574.1763449</b>      | <b>-573.9910110</b><br>(imag=-1103 cm <sup>-1</sup> ) | <b>-574.0345308</b>      | <b>132.0</b>                         |
| aco_026sol     | -574.1756222             | -573.9903400<br>(imag=-1116 cm <sup>-1</sup> )        | -574.0339111             | +133.6                               |
|                |                          |                                                       |                          |                                      |
| <b>Ac-III</b>  |                          |                                                       |                          |                                      |
| aco_015sol     | <b>-574.2255370</b>      | <b>-574.0390585</b>                                   | <b>-574.0849449</b>      | -0.4                                 |



|               |                     |                                                      |                     |              |
|---------------|---------------------|------------------------------------------------------|---------------------|--------------|
| aco_021solf   | -574.2236443        | -574.0372876                                         | -574.0830968        | +4.5         |
| aco_010solf   | -574.2218053        | -574.0354739                                         | -574.0818405        | +7.8         |
| aco_011solr   | -574.2168136        | -574.0306418                                         | -574.0771707        | +20.0        |
| aco_028solf   | -574.2155529        | -574.0293511                                         | -574.0758827        | +23.4        |
|               |                     |                                                      |                     |              |
| <b>Ac-TS2</b> |                     |                                                      |                     |              |
| aco_010sol    | <b>-574.1967379</b> | <b>-574.0115294</b><br>(imag=-189 cm <sup>-1</sup> ) | <b>-574.0583923</b> | <b>+69.4</b> |
| aco_028sol    | -574.1943482        | -574.0092215<br>(imag=-155 cm <sup>-1</sup> )        | -574.0563277        | +74.8        |
|               |                     |                                                      |                     |              |
| <b>Ac-TS3</b> |                     |                                                      |                     |              |
| aco_023sol    | <b>-574.1953412</b> | <b>-574.0105058</b><br>(imag=-58 cm <sup>-1</sup> )  | <b>-574.0580900</b> | <b>+70.1</b> |
| aco_011sol    | -574.1945222        | -574.0094768<br>(imag=-58 cm <sup>-1</sup> )         | -574.0568769        | +73.3        |
|               |                     |                                                      |                     |              |
| <b>Ac-TS4</b> |                     |                                                      |                     |              |
| aco_022sol    | -574.1976621        | -574.0122772<br>(imag=-161 cm <sup>-1</sup> )        | -574.0590799        | <b>+67.5</b> |
|               |                     |                                                      |                     |              |
| <b>Ac-TS5</b> |                     |                                                      |                     |              |
| aco_024sol    | <b>-574.2139489</b> | <b>-574.0286752</b><br>(imag=-217 cm <sup>-1</sup> ) | <b>-574.0741509</b> | <b>+28.0</b> |
|               |                     |                                                      |                     |              |
| <b>Ac-TS6</b> |                     |                                                      |                     |              |
| aco_021sol    | -574.2065578        | -574.0234399<br>(imag=-352 cm <sup>-1</sup> )        | -574.0689469        | <b>+41.6</b> |
|               |                     |                                                      |                     |              |
| <b>Ac-IV</b>  |                     |                                                      |                     |              |
| aco_021solr   | <b>-574.2407610</b> | <b>-574.0549576</b>                                  | -574.1045295        | -51.8        |

|                     |                     |                     |                     |              |
|---------------------|---------------------|---------------------|---------------------|--------------|
| aco_022sol          | -574.2404534        | -574.0546750        | <b>-574.1048372</b> | <b>-52.6</b> |
| aco_024solr         | -574.2404462        | -574.0546345        | -574.1045980        | -52.0        |
|                     |                     |                     |                     |              |
| <b>V</b>            |                     |                     |                     |              |
| aco_007sol          | -345.1305303        | -345.0124047        | -345.0472302        |              |
|                     |                     |                     |                     |              |
| <b>Ac-VI</b>        |                     |                     |                     |              |
| aco_009sol          | -229.0984248        | -229.0327659        | -229.0621870        |              |
|                     |                     |                     |                     |              |
| <b>V + Ac-VI</b>    |                     |                     | -574.1094172        | -64.6        |
|                     |                     |                     |                     |              |
| <b>VII</b>          |                     |                     |                     |              |
| aco_019sol          | <b>-345.5531468</b> | <b>-345.4224408</b> | <b>-345.4574849</b> |              |
| aco_020sol          | -345.5523892        | -345.4216836        | -345.4567290        |              |
|                     |                     |                     |                     |              |
| <b>Ac-VIII</b>      |                     |                     |                     |              |
| aco_018sol          | -228.6170295        | -228.5641993        | -228.5933670        |              |
|                     |                     |                     |                     |              |
| <b>VII +Ac-VIII</b> |                     |                     | -574.0508519        | +89.2        |

**Table S04.** Energy values for the species shown in Scheme S01 at ROB2PLYP-D3/cc-pVTZ level.<sup>[a]</sup>

| System      | $E_{tot}$<br>(ROB2PLYP-D3/<br>cc-pVTZ) | $H_{298}$<br>(ROB2PLYP-D3/<br>cc-pVTZ) | $G_{298}$<br>(ROB2PLYP-D3/<br>cc-pVTZ) | $\Delta G_{298}$<br>(ROB2PLYP-D3/<br>cc-pVTZ)<br>[kJ/mol] |
|-------------|----------------------------------------|----------------------------------------|----------------------------------------|-----------------------------------------------------------|
| <b>Ac-I</b> |                                        |                                        |                                        |                                                           |
| aco_024f    | <b>-574.0024571</b>                    | <b>-573.8135594</b>                    | <b>-573.8623678</b>                    | <b>0.0</b>                                                |
| aco_005     | -573.9981015                           | -573.8092277                           | -573.858624                            | +9.8                                                      |
| aco_002     | -573.9943647                           | -573.8056982                           | -573.855237                            | +18.7                                                     |

|                |                     |                     |                     |               |
|----------------|---------------------|---------------------|---------------------|---------------|
| aco_006        | -573.9927087        | -573.8040834        | -573.8533675        | +23.6         |
| aco_003        | -573.9914839        | -573.8029612        | -573.8522943        | +26.4         |
|                |                     |                     |                     |               |
| <b>Ac-TS1a</b> |                     |                     |                     |               |
| aco_014        | <b>-573.9532856</b> | <b>-573.766929</b>  | <b>-573.8138046</b> | <b>+127.5</b> |
| aco_025        | -573.9529734        | -573.7666588        | -573.8135153        | +128.3        |
|                |                     |                     |                     |               |
| <b>Ac-II</b>   |                     |                     |                     |               |
| aco_015r       | <b>-573.9805221</b> | <b>-573.791243</b>  | <b>-573.8372358</b> | <b>+66.0</b>  |
| aco_012        | -573.980322         | -573.7910375        | -573.8369958        | +66.6         |
| aco_008        | -573.9797084        | -573.7905543        | -573.8368245        | +67.1         |
| aco_026r       |                     |                     |                     |               |
| aco_013        | <b>-573.975017</b>  | <b>-573.7859578</b> | <b>-573.8325463</b> | <b>+78.3</b>  |
| aco_027        | -573.9745344        | -573.785568         | -573.8323478        | +78.8         |
|                |                     |                     |                     |               |
| <b>Ac-TS1b</b> |                     |                     |                     |               |
| aco_015        | <b>-573.952666</b>  | <b>-573.76184</b>   | <b>-573.808042</b>  | <b>+129.3</b> |
| aco_026        | -573.9504625        | -573.7598495        | -573.8062985        | +133.8        |
|                |                     |                     |                     |               |
| <b>Ac-III</b>  |                     |                     |                     |               |
| aco_016        | <b>-573.9989888</b> | <b>-573.8117579</b> | <b>-573.8604383</b> | <b>+5.1</b>   |
| aco_021f       | -573.9972895        | -573.8101877        | -573.8589609        | +8.9          |
| aco_004        | -573.9920242        | -573.8051606        | -573.8543158        | +21.1         |
| aco_023r       | -573.9892405        | -573.8022124        | -573.8514551        | +28.7         |
| aco_011r       | -573.9883327        | -573.8013369        | -573.8507488        | +30.5         |
| aco_028f       | -573.9862239        | -573.7993835        | -573.8487283        | +35.8         |
|                |                     |                     |                     |               |
| <b>Ac-TS2</b>  |                     |                     |                     |               |
| aco_010        | <b>-573.9757419</b> | <b>-573.7897107</b> | <b>-573.8386481</b> | <b>+62.3</b>  |
| aco_028        | -573.9719098        | -573.7859761        | -573.8350828        | +71.6         |

|                 |                     |                     |                     |              |
|-----------------|---------------------|---------------------|---------------------|--------------|
| <b>Ac-TS3</b>   |                     |                     |                     |              |
| aco_029         | <b>-573.9714725</b> | -573.7854156        | -573.8353949        | +70.8        |
| aco_023         | -573.9713799        | <b>-573.7858483</b> | <b>-573.8359539</b> | <b>+69.3</b> |
| aco_011         | -573.9699425        | -573.783942         | -573.8337714        | +75.1        |
|                 |                     |                     |                     |              |
| <b>Ac-TS4</b>   |                     |                     |                     |              |
| aco_022         | -573.9762456        | -573.7902976        | -573.839693         | <b>+59.5</b> |
|                 |                     |                     |                     |              |
| <b>Ac-TS5</b>   |                     |                     |                     |              |
| aco_024         | -573.9957751        | -573.810248         | -573.8587621        | <b>+9.5</b>  |
|                 |                     |                     |                     |              |
| <b>Ac-TS6</b>   |                     |                     |                     |              |
| aco_021         | -573.9853675        | -573.8021705        | -573.850458         | <b>+31.3</b> |
|                 |                     |                     |                     |              |
| <b>Ac-IV</b>    |                     |                     |                     |              |
| aco_021r        | <b>-574.0165365</b> | <b>-573.8299182</b> | <b>-573.8819485</b> | <b>-51.4</b> |
| aco_022f        | -574.0164979        | -573.829874         | -573.8824504        | -52.7        |
|                 |                     |                     |                     |              |
| <b>V</b>        |                     |                     |                     |              |
| aco_007         | -344.9842656        | -344.8659834        | -344.9038788        |              |
|                 |                     |                     |                     |              |
| <b>Ac-VI</b>    |                     |                     |                     |              |
| aco_009         | -229.0141332        | -229.007996         | -228.980388         |              |
|                 |                     |                     |                     |              |
| <b>V + AcVI</b> |                     |                     | -573.8842856        | <b>-57.5</b> |
|                 |                     |                     |                     |              |
| <b>VII</b>      |                     |                     |                     |              |
| aco_019         | -345.32368          | -345.1929238        | -345.2310338        |              |
|                 |                     |                     |                     |              |

|                     |              |              |              |               |
|---------------------|--------------|--------------|--------------|---------------|
| <b>Ac-VIII</b>      |              |              |              |               |
| aco_018             | -228.4395757 | -228.3869523 | -228.4195748 |               |
| <b>VII + AcVIII</b> |              |              | -573.6506086 | <b>+556.0</b> |

[a] Using gas phase (U)M06-2X/def2-TZVP geometries.

**Table S05.** Energy values for the species shown in Scheme S01 at DLPNO-CCSD(T)/CBS level.<sup>[a]</sup>

| System         | $E_{tot}$<br>(DLPNO-<br>CCSD(T)/CBS) | $H_{298}$<br>(DLPNO-<br>CCSD(T)/CBS) | $G_{298}$<br>(DLPNO-<br>CCSD(T)/CBS) | $\Delta G_{298}$<br>(DLPNO-<br>CCSD(T)/CBS)<br>[kJ/mol] | $\Delta G_{298, qh, sol}$<br>(DLPNO-<br>CCSD(T)/CBS)<br>[kJ/mol] |
|----------------|--------------------------------------|--------------------------------------|--------------------------------------|---------------------------------------------------------|------------------------------------------------------------------|
| <b>Ac-I</b>    |                                      |                                      |                                      |                                                         |                                                                  |
| aco_024f       | <b>-573.6027267</b>                  | <b>-573.413829</b>                   | <b>-573.4626374</b>                  | <b>0.0</b>                                              | <b>0.0</b>                                                       |
| aco_005        | -573.5993231                         | -573.4104493                         | -573.4598456                         | +7.3                                                    | +3.4                                                             |
| aco_002        | -573.5957068                         | -573.4070403                         | -573.4565791                         | +15.9                                                   | +5.6                                                             |
| aco_006        | -573.5935945                         | -573.4049692                         | -573.4542533                         | +22.0                                                   | +16.2                                                            |
| aco_003        | -573.5925121                         | -573.4039894                         | -573.4533225                         | +24.5                                                   | +16.9                                                            |
| <b>Ac-TS1a</b> |                                      |                                      |                                      |                                                         |                                                                  |
| aco_014        | <b>-573.5526571</b>                  | <b>-573.3663005</b>                  | <b>-573.4131761</b>                  | <b>+129.9</b>                                           | <b>+126.6</b>                                                    |
| aco_025        | -573.5523974                         | -573.3660828                         | -573.4129393                         | +130.5                                                  | +128.1                                                           |
| <b>Ac-II</b>   |                                      |                                      |                                      |                                                         |                                                                  |
| aco_015r       | <b>-573.5866482</b>                  | <b>-573.3973691</b>                  | <b>-573.4433619</b>                  | <b>+50.6</b>                                            | +52.8                                                            |
| aco_012        | -573.5862836                         | -573.3969991                         | -573.4429574                         | +51.7                                                   | +52.5                                                            |
| aco_008        | -573.5854133                         | -573.3962592                         | -573.4425294                         | +52.8                                                   | <b>+52.2</b>                                                     |
| aco_026r       | -573.5845233                         | -573.3953863                         | -573.4416497                         | +55.1                                                   | +53.1                                                            |
| aco_013        | -573.581099                          | -573.3920398                         | -573.4386283                         | +63.0                                                   | +57.4                                                            |
| aco_027        | -573.5797266                         | -573.3907602                         | -573.43754                           | +65.9                                                   | +60.7                                                            |

|                |                     |                     |                     |               |               |
|----------------|---------------------|---------------------|---------------------|---------------|---------------|
| <b>Ac-TS1b</b> |                     |                     |                     |               |               |
| aco_015        | <b>-573.5537356</b> | <b>-573.3678784</b> | <b>-573.4142047</b> | <b>+127.2</b> | <b>+127.3</b> |
| aco_026        | -573.5512673        | -573.365614         | -573.4121958        | +132.4        | +128.8        |
|                |                     |                     |                     |               |               |
| <b>Ac-III</b>  |                     |                     |                     |               |               |
| aco_016        | <b>-573.6010316</b> | <b>-573.4138007</b> | <b>-573.4624811</b> | <b>+0.4</b>   | <b>+0.3</b>   |
| aco_021f       | -573.5993607        | -573.4122589        | -573.4610321        | +4.2          | +4.5          |
| aco_004        | -573.5940455        | -573.4071819        | -573.4563371        | +16.5         | +8.0          |
| aco_023r       | -573.5914636        | -573.4044355        | -573.4536782        | +23.5         | +18.4         |
| aco_011r       | -573.5903847        | -573.4033889        | -573.4528008        | +25.8         | +22.1         |
| aco_028f       | -573.5880906        | -573.4012502        | -573.450595         | +31.6         | +24.3         |
|                |                     |                     |                     |               |               |
| <b>Ac-TS2</b>  |                     |                     |                     |               |               |
| aco_010        | <b>-573.5670426</b> | <b>-573.3810114</b> | <b>-573.4299488</b> | <b>+85.8</b>  | <b>+76.8</b>  |
| aco_028        | -573.5631769        | -573.3772432        | -573.4263499        | +95.3         | +84.1         |
|                |                     |                     |                     |               |               |
| <b>Ac-TS3</b>  |                     |                     |                     |               |               |
| aco_029        |                     |                     |                     |               |               |
| aco_023        | <b>-573.5625897</b> | <b>-573.3770581</b> | <b>-573.4271637</b> | <b>+93.1</b>  | <b>+78.9</b>  |
| aco_011        | -573.5587237        | -573.3727232        | -573.4225526        | +105.2        | +86.5         |
|                |                     |                     |                     |               |               |
| <b>Ac-TS4</b>  |                     |                     |                     |               |               |
| aco_022        | -573.5667764        | -573.3808284        | -573.4302238        | <b>+85.1</b>  | <b>+77.8</b>  |
|                |                     |                     |                     |               |               |
| <b>Ac-TS5</b>  |                     |                     |                     |               |               |
| aco_024        | -573.5870526        | -573.4015255        | -573.4500396        | <b>+33.1</b>  | <b>+31.5</b>  |
|                |                     |                     |                     |               |               |
| <b>Ac-TS6</b>  |                     |                     |                     |               |               |
| aco_021        | -573.5788909        | -573.3956939        | -573.4439814        | <b>+49.0</b>  | <b>+45.8</b>  |

|                     |                     |                     |                     |               |              |
|---------------------|---------------------|---------------------|---------------------|---------------|--------------|
| <b>Ac-IV</b>        |                     |                     |                     |               |              |
| aco_021r            | <b>-573.6131139</b> | <b>-573.4264956</b> | <b>-573.4785259</b> | <b>-41.7</b>  | <b>-46.7</b> |
| aco_022f            | -573.6124497        | -573.4258258        | -573.4784022        | -41.4         | -46.5        |
|                     |                     |                     |                     |               |              |
| <b>V</b>            |                     |                     |                     |               |              |
| aco_007             | -344.7313273        | -344.6130451        | -344.6509405        |               |              |
|                     |                     |                     |                     |               |              |
| <b>Ac-VI</b>        |                     |                     |                     |               |              |
| aco_009             | -228.8664334        | -228.8602962        | -228.8326882        |               |              |
|                     |                     |                     |                     |               |              |
| <b>V + AcVI</b>     |                     |                     | -573.4836475        | <b>-55.2</b>  | <b>-80.8</b> |
|                     |                     |                     |                     |               |              |
| <b>VII</b>          |                     |                     |                     |               |              |
| aco_019             | -345.0628669        | -344.9321107        | -344.9702207        |               |              |
|                     |                     |                     |                     |               |              |
| <b>Ac-VIII</b>      |                     |                     |                     |               |              |
| aco_018             | -228.2980208        | -228.2453974        | -228.2780199        |               |              |
|                     |                     |                     |                     |               |              |
| <b>VII + AcVIII</b> |                     |                     | -573.2482323        | <b>+562.9</b> | <b>+78.3</b> |
|                     |                     |                     |                     |               |              |

[a] Using gas phase (U)M06-2X/def2-TZVP geometries.

**Table S06.** Energy values for the species shown in Scheme S01 at G3B3 level.<sup>[a]</sup>

| <b>System</b>   | <b><math>E_{tot}</math><br/>(G3B3)</b> | <b><math>H_{298}</math><br/>(G3B3)</b> | <b><math>G_{298}</math><br/>(G3B3)</b> | <b><math>\Delta G_{298}</math><br/>(G3B3) [kJ/mol]</b> |
|-----------------|----------------------------------------|----------------------------------------|----------------------------------------|--------------------------------------------------------|
| <b>Ac-I</b>     |                                        |                                        |                                        |                                                        |
| <b>aco_024f</b> | -574.0055819                           | -573.81668                             | -573.86549                             | <b>0.0</b>                                             |
| aco_005         | -574.0023254                           | -573.81345                             | -573.86285                             | <b>+6.9</b>                                            |
| aco_002         | -573.9984928                           | -573.80983                             | -573.85937                             | <b>+16.1</b>                                           |

|                |              |            |            |        |
|----------------|--------------|------------|------------|--------|
| aco_006        | -573.9970527 | -573.80843 | -573.85771 | +20.4  |
| aco_003        | -573.996128  | -573.80761 | -573.85694 | +22.5  |
|                |              |            |            |        |
| <b>Ac-TS1a</b> |              |            |            |        |
| aco_014        | -573.9583971 | -573.77204 | -573.81892 | +122.3 |
| aco_025        | -573.9581932 | -573.77188 | -573.81874 | +122.8 |
|                |              |            |            |        |
| <b>Ac-II</b>   |              |            |            |        |
| aco_015r       | -573.9908544 | -573.80158 | -573.84757 | +47.1  |
| aco_012        | -573.9905827 | -573.8013  | -573.84726 | +47.9  |
| aco_008        | -573.9896809 | -573.80053 | -573.8468  | +49.1  |
| aco_026r       | -573.9886182 | -573.79948 | -573.84574 | +51.8  |
| aco_013        | -573.9851772 | -573.79612 | -573.84271 | +59.8  |
| aco_027        | -573.9840734 | -573.79511 | -573.84189 | +62.0  |
|                |              |            |            |        |
| <b>Ac-TS1b</b> |              |            |            |        |
| aco_015        | -573.9594506 | -573.77359 | -573.81992 | +119.7 |
| aco_026        | -573.9569883 | -573.77134 | -573.81792 | +124.9 |
|                |              |            |            |        |
| <b>Ac-III</b>  |              |            |            |        |
| aco_016        | -574.0052918 | -573.81806 | -573.86674 | -3.3   |
| aco_021f       | -574.0033269 | -573.81623 | -573.865   | +1.3   |
| aco_004        | -573.9986142 | -573.81175 | -573.86091 | +12.0  |
| aco_023r       | -573.9954238 | -573.8084  | -573.85764 | +20.6  |
| aco_011r       | -573.9942018 | -573.80721 | -573.85662 | +23.3  |
| aco_028f       | -573.9924977 | -573.80566 | -573.855   | +27.5  |
|                |              |            |            |        |
| <b>Ac-TS2</b>  |              |            |            |        |
| aco_010        | -573.9743744 | -573.78834 | -573.83728 | +74.1  |
| aco_028        | -573.9700306 | -573.7841  | -573.8332  | +84.8  |



|                  |              |            |            |               |
|------------------|--------------|------------|------------|---------------|
| <b>Ac-TS3</b>    |              |            |            |               |
| aco_029          | -573.9657565 | -573.7797  | -573.82968 | <b>+94.0</b>  |
| aco_023          | -573.9678518 | -573.78232 | -573.83243 | <b>+86.8</b>  |
| aco_011          | -573.9633045 | -573.7773  | -573.82713 | <b>+100.7</b> |
|                  |              |            |            |               |
| <b>Ac-TS4</b>    |              |            |            |               |
| aco_022          | -573.9737462 | -573.7878  | -573.83719 | <b>+74.3</b>  |
|                  |              |            |            |               |
| <b>Ac-TS5</b>    |              |            |            |               |
| aco_024          | -573.9914608 | -573.80593 | -573.85445 | <b>+29.0</b>  |
|                  |              |            |            |               |
| <b>Ac-TS6</b>    |              |            |            |               |
| aco_021          | -573.9840421 | -573.80085 | -573.84913 | <b>+43.0</b>  |
|                  |              |            |            |               |
| <b>Ac-IV</b>     |              |            |            |               |
| aco_021r         | -574.0162405 | -573.82962 | -573.88165 | <b>-42.4</b>  |
| aco_022f         | -574.0158263 | -573.8292  | -573.88178 | <b>-42.8</b>  |
|                  |              |            |            |               |
| <b>V</b>         |              |            |            |               |
| aco_007          | -344.8623419 | -344.74406 | -344.78196 |               |
|                  |              |            |            |               |
| <b>Ac-VI</b>     |              |            |            |               |
| aco_009          | -228.9233183 | -228.91718 | -228.88957 |               |
|                  |              |            |            |               |
| <b>V + Ac-VI</b> | -573.9984532 | -573.81403 | -573.88434 | <b>-49.5</b>  |
|                  |              |            |            |               |
| <b>VII</b>       |              |            |            |               |
| aco_019          | -345.1917599 | -345.061   | -345.09911 |               |
|                  |              |            |            |               |

|                     |              |            |            |               |
|---------------------|--------------|------------|------------|---------------|
| <b>Ac-VIII</b>      |              |            |            |               |
| aco_018             | -228.3576195 | -228.305   | -228.33762 |               |
|                     |              |            |            |               |
| <b>VI + Ac-VIII</b> | -573.7621724 | -573.57879 | -573.64952 | <b>+567.0</b> |

[a] Using gas phase (U)M06-2X/def2-TZVP geometries.

## 4.0 Evaluation of Leaving groups

### 4.1 Pivaloyl

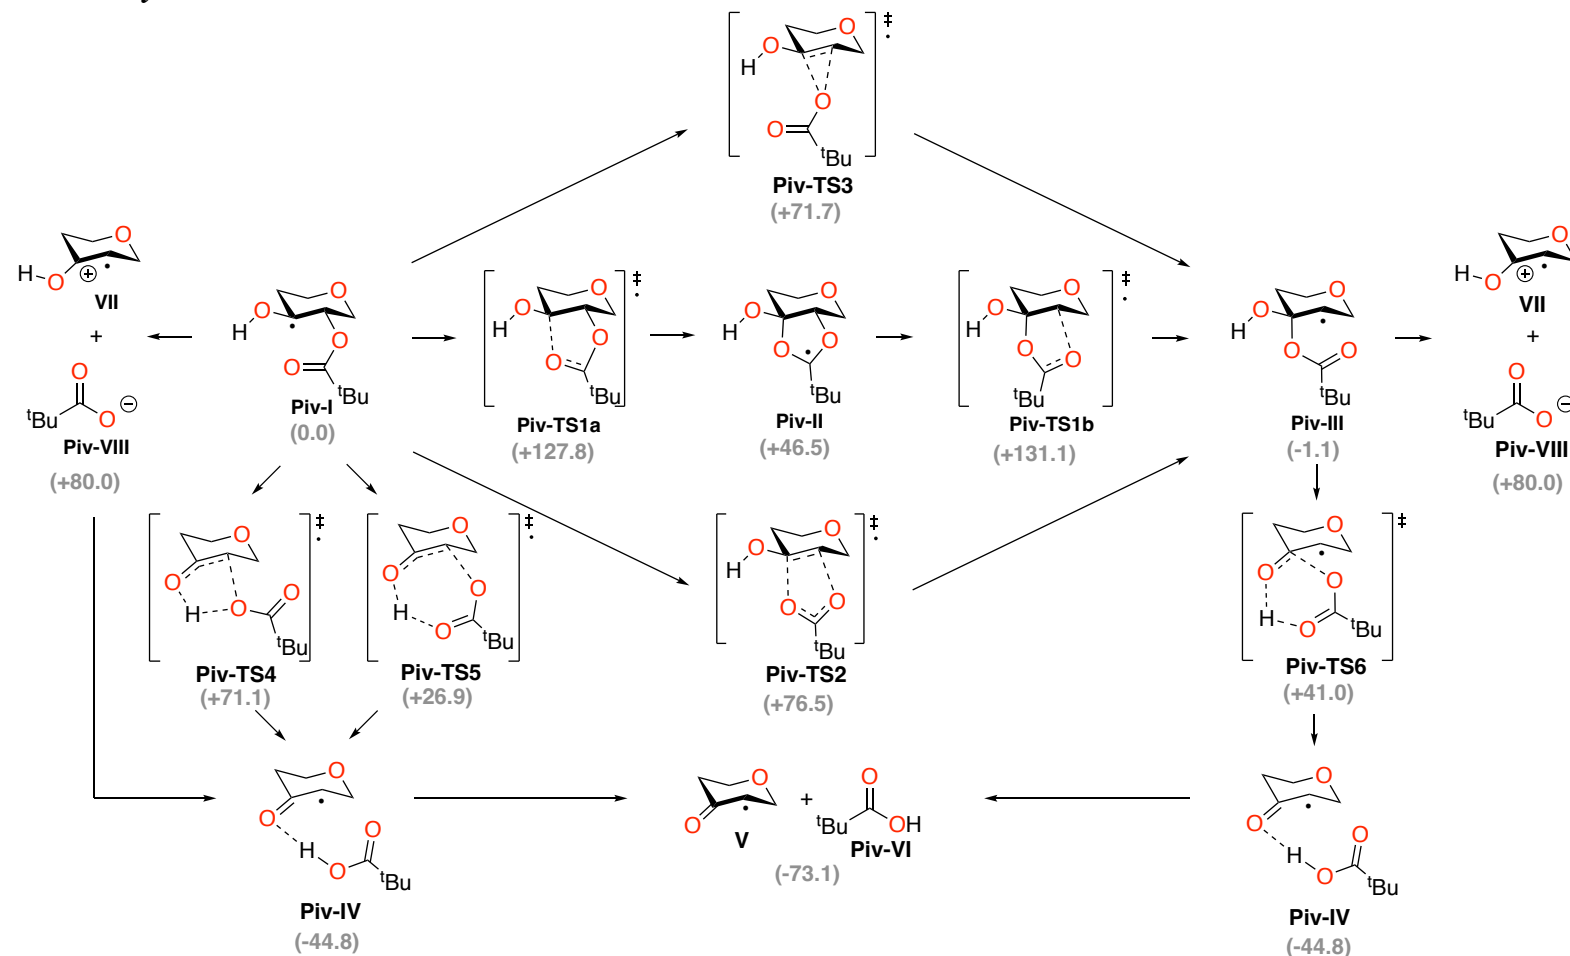

**Scheme S03.** Pivaloxy group migration and elimination pathways for model substrate **Piv-I**. Gibbs free energy differences ( $\Delta G_{298,gh,sol}$ ) relative to radical **Piv-I** ((U)M06-2X/def2-TZVP//SMD(acetonitrile) results in kJ/mol) are given in brackets.

**Table S07.** Reaction energies for the species shown in Scheme S03 (in kJ/mol).<sup>[a]</sup>

| System                | $\Delta H_{298}^{[b]}$<br>((U)M06-2X/<br>def2-TZVP) | $\Delta G_{298,qh}^{[b]}$<br>((U)M06-2X/<br>def2-TZVP) | $\Delta G_{298,qh,sol}^{[b]}$<br>((U)M06-2X/<br>def2-TZVP) |
|-----------------------|-----------------------------------------------------|--------------------------------------------------------|------------------------------------------------------------|
| <b>Piv-I</b>          | 0.0                                                 | 0.0                                                    | 0.0                                                        |
| <b>Piv-TS1a</b>       | +123.3                                              | +130.2                                                 | +127.8                                                     |
| <b>Piv-II</b>         | +37.3                                               | +45.4                                                  | +46.5                                                      |
| <b>Piv-TS1b</b>       | +123.8                                              | +131.4                                                 | +131.1                                                     |
| <b>Piv-III</b>        | -1.1                                                | -1.0                                                   | -1.1                                                       |
|                       |                                                     |                                                        |                                                            |
| <b>Piv-TS2</b>        | +85.3                                               | +85.1                                                  | +76.5                                                      |
| <b>Piv-TS3</b>        | +93.1                                               | +90.2                                                  | +71.7                                                      |
|                       |                                                     |                                                        |                                                            |
| <b>Piv-TS4</b>        | +77.8                                               | +77.4                                                  | +71.1                                                      |
| <b>Piv-TS5</b>        | <b>+27.7</b>                                        | <b>+28.3</b>                                           | <b>+26.9</b>                                               |
| <b>Piv-TS6</b>        | +43.1                                               | +44.2                                                  | +41.0                                                      |
| <b>Piv-IV</b>         | -30.9                                               | -39.4                                                  | -44.8                                                      |
| <b>V + Piv-VI</b>     | +10.4                                               | -47.4                                                  | -73.1                                                      |
|                       |                                                     |                                                        |                                                            |
| <b>VII + Piv-VIII</b> | +605.1                                              | +547.6                                                 | +80.0                                                      |
|                       |                                                     |                                                        |                                                            |

[a] Calculated with reference to the best conformer of each species. [b] Using gas phase (U)M06-2X/def2-TZVP geometries.

**Table S08.** Energy values for the species shown in Scheme S03.

| System           | $E_{tot}$<br>((U)M06-2X/<br>def2-TZVP) | $H_{298}$<br>((U)M06-2X/<br>def2-TZVP) | $G_{298,qh}$<br>((U)M06-2X/<br>def2-TZVP) | $E_{tot}$<br>(SMD(AcCN)/<br>(U)M06-2X/<br>def2-TZVP) <sup>a</sup> |
|------------------|----------------------------------------|----------------------------------------|-------------------------------------------|-------------------------------------------------------------------|
| <b>Piv-I</b>     |                                        |                                        |                                           |                                                                   |
| <b>pivo_024f</b> | -692.1378245                           | -691.8623286                           | -691.9193282                              | -692.152686                                                       |

|                 |              |                                               |              |              |
|-----------------|--------------|-----------------------------------------------|--------------|--------------|
| pivo_005        | -692.1345645 | -691.8591817                                  | -691.9163862 | -692.1510244 |
| pivo_002        | -692.1306495 | -691.8554489                                  | -691.9131089 | -692.1492834 |
| pivo_006        | -692.1299528 | -691.8547468                                  | -691.911963  | -692.1469051 |
| pivo_003        | -692.1284874 | -691.8533197                                  | -691.9106593 | -692.1462119 |
|                 |              |                                               |              |              |
| <b>Piv-TS1a</b> |              |                                               |              |              |
| <b>pivo_014</b> | -692.0873726 | -691.8143261<br>(imag=-982 cm <sup>-1</sup> ) | -691.8692363 | -692.1036378 |
| pivo_025        | -692.0884449 | -691.8153778<br>(imag=-945cm <sup>-1</sup> )  | -691.8697205 | -692.1038399 |
|                 |              |                                               |              |              |
| <b>Piv-II</b>   |              |                                               |              |              |
| pivo_015r       | -692.1232578 | -691.8473452                                  | -691.9014022 | -692.1373992 |
| pivo_012        | -692.1240628 | -691.8481277                                  | -691.9020402 | -692.1384856 |
| pivo_008        | -692.1223452 | -691.8465518                                  | -691.9009082 | -692.1376208 |
| pivo_026r       | -692.1210242 | -691.8452497                                  | -691.8996284 | -692.1368019 |
| pivo_013        | -692.117978  | -691.8423385                                  | -691.8973139 | -692.1347778 |
| pivo_027        | -692.116933  | -691.8414128                                  | -691.8965329 | -692.1341568 |
|                 |              |                                               |              |              |
| <b>Piv-TS1a</b> |              |                                               |              |              |
| pivo_015        | -692.0877439 | -691.8151613<br>(imag=-954 cm <sup>-1</sup> ) | -691.8692986 | -692.1027021 |
| pivo_026        | -692.0854672 | -691.8131097<br>(imag=-977cm <sup>-1</sup> )  | -691.8675308 | -692.1018074 |
|                 |              |                                               |              |              |
| <b>Piv-III</b>  |              |                                               |              |              |
| <b>pivo_016</b> | -692.1364834 | -691.8627483                                  | -691.9196954 | -692.1514009 |
| pivo_021f       | -692.1347582 | -691.8610261                                  | -691.9176746 | -692.1494821 |
| pivo_004        | -692.1292988 | -691.8558593                                  | -691.9132417 | -692.1474753 |
| pivo_023r       | -692.1267681 | -691.8531113                                  | -691.9107757 | -692.143399  |
| pivo_011r       | -692.1256486 | -691.8520699                                  | -691.9096095 | -692.1420397 |

|                 |              |                                               |              |              |
|-----------------|--------------|-----------------------------------------------|--------------|--------------|
| pivo_028f       | -692.1233047 | -691.8498356                                  | -691.9073656 | -692.1409952 |
|                 |              |                                               |              |              |
| <b>Piv-TS2</b>  |              |                                               |              |              |
| <b>pivo_010</b> | -692.1024191 | -691.8298437<br>(imag=-234 cm <sup>-1</sup> ) | -691.8869095 | -692.1205559 |
| pivo_028        | -692.0979952 | -691.8264992<br>(imag=-259 cm <sup>-1</sup> ) | -691.8814736 |              |
|                 |              |                                               |              |              |
| <b>Piv-TS3</b>  |              |                                               |              |              |
| pivo_029        | -692.0993457 | -691.8268279<br>(imag=-84 cm <sup>-1</sup> )  | -691.8846353 | -692.1215944 |
| pivo_023        | -692.0989374 | -691.8268578<br>(imag=-146 cm <sup>-1</sup> ) | -691.8849716 | -692.1193044 |
| pivo_011        | -692.0966512 | -691.8241486<br>(imag=-53 cm <sup>-1</sup> )  | -691.8824554 | -692.1185544 |
|                 |              |                                               |              |              |
| <b>Piv-TS4</b>  |              |                                               |              |              |
| pivo_022        | -692.1051248 | -691.8326902<br>(imag=-181 cm <sup>-1</sup> ) | -691.8898428 | -692.1223861 |
|                 |              |                                               |              |              |
| <b>Piv-TS5</b>  |              |                                               |              |              |
| pivo_024        | -692.1238643 | -691.851784<br>(imag=-173 cm <sup>-1</sup> )  | -691.9085328 | -692.1392881 |
|                 |              |                                               |              |              |
| <b>Piv-TS6</b>  |              |                                               |              |              |
| pivo_021        | -692.1156835 | -691.8458952<br>(imag=-437 cm <sup>-1</sup> ) | -691.9025089 | -692.1317623 |
|                 |              |                                               |              |              |
| <b>Piv-IV</b>   |              |                                               |              |              |
| pivo_021r       | -692.1472291 | -691.8741067                                  | -691.9343485 | -692.1641491 |
| pivo_022f       | -692.1471    | -691.8738413                                  | -691.9341821 | -692.1639583 |

|                 |              |              |              |              |
|-----------------|--------------|--------------|--------------|--------------|
| <b>V</b>        |              |              |              |              |
| pivo_007        | -345.1158220 | -344.9975398 | -345.0354352 | -345.1303555 |
|                 |              |              |              |              |
| <b>Piv-VI</b>   |              |              |              |              |
| pivo_009        | -347.0136253 | -346.8608407 | -346.9019646 | -347.0237316 |
|                 |              |              |              |              |
| <b>VII</b>      |              |              |              |              |
| pivo_019        | -345.4496196 | -345.3188634 | -345.3569734 | -345.5527916 |
|                 |              |              |              |              |
| <b>Piv-VIII</b> |              |              |              |              |
| pivo_018        | -346.451875  | -346.313001  | -346.3537822 | -346.5416612 |
|                 |              |              |              |              |

[a] Using gas phase (U)M06-2X/def2-TZVP geometries.

## 4.2 Benzoyl

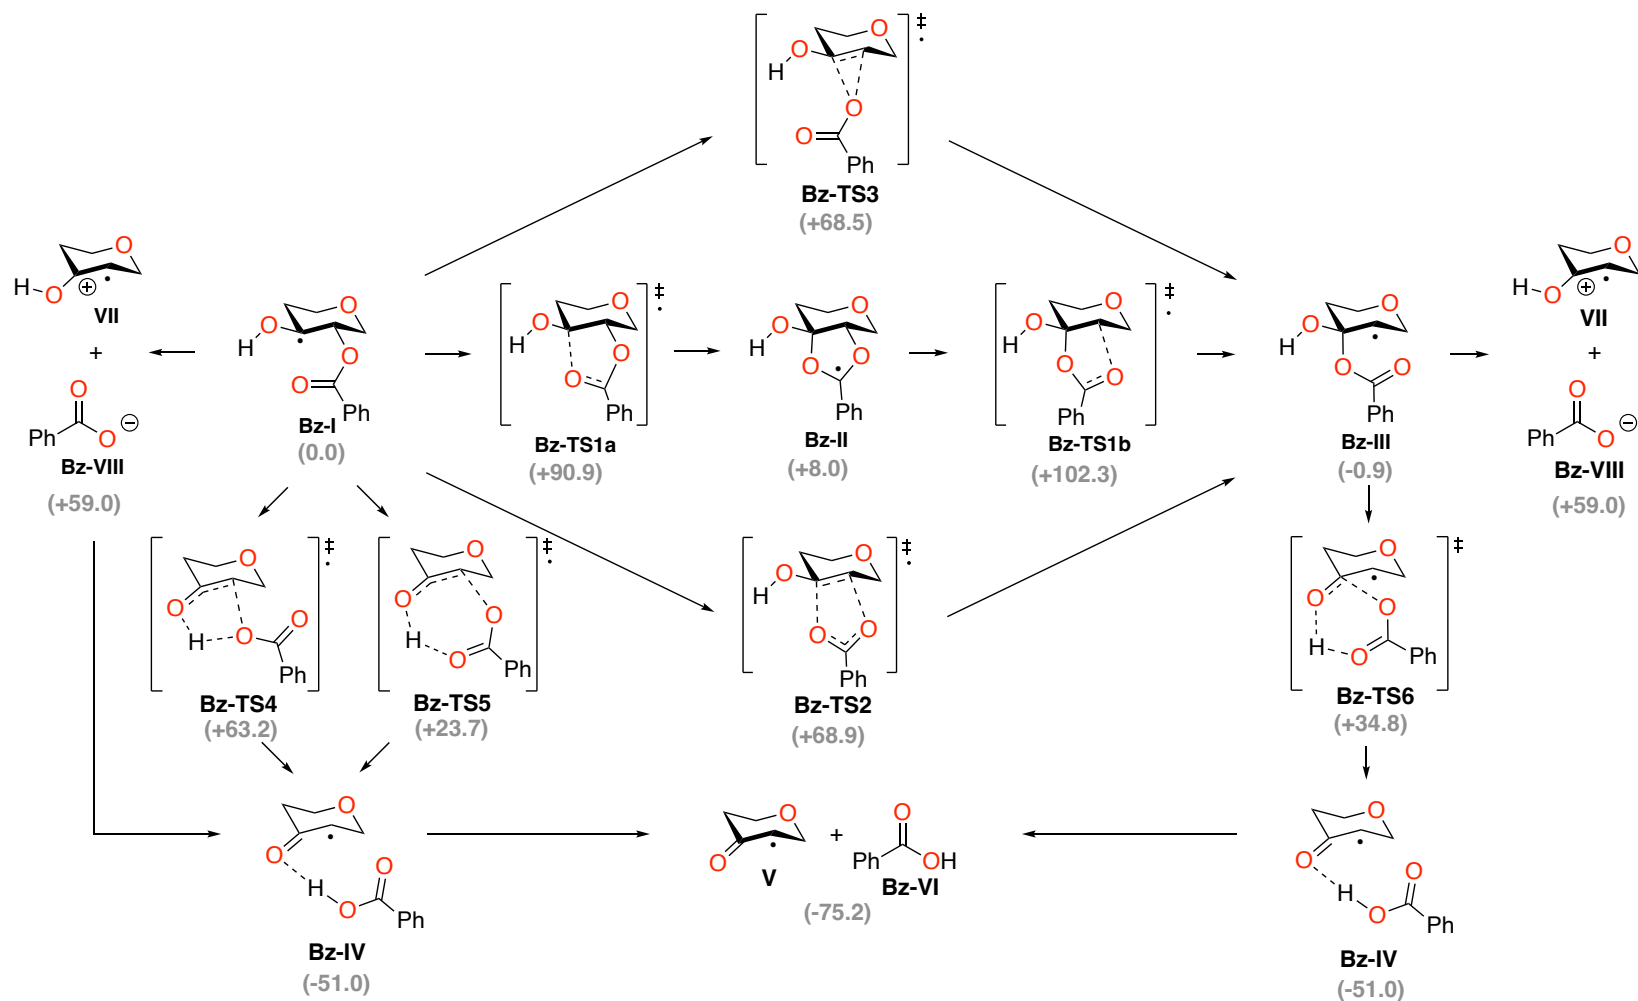

**Scheme S04.** Benzoyloxy group migration and elimination pathways for model substrate **Bz-I**. Gibbs free energy differences ( $\Delta G_{298, qh, sol}$ ) relative to radical **Bz-I** ((U)M06-2X/def2-TZVP//SMD(acetonitrile)) results in kJ/mol) are given in brackets.



**Table S09.** Reaction energies for the species shown in Scheme S04 (in kJ/mol).<sup>[a]</sup>

| System               | $\Delta H_{298}^{[b]}$<br>((U)M06-2X/<br>def2-TZVP) | $\Delta G_{298,qh}^{[b]}$<br>((U)M06-2X/<br>def2-TZVP) | $\Delta G_{298,qh,sol}^{[b]}$<br>((U)M06-2X/<br>def2-TZVP) |
|----------------------|-----------------------------------------------------|--------------------------------------------------------|------------------------------------------------------------|
| <b>Bz-I</b>          | 0.0                                                 | 0.0                                                    | 0.0                                                        |
| <b>Bz-TS1a</b>       | +100.2                                              | +104.9                                                 | +90.9                                                      |
| <b>Bz-II</b>         | +10.0                                               | +15.0                                                  | +8.0                                                       |
| <b>Bz-TS1b</b>       | +98.2                                               | +104.7                                                 | +102.3                                                     |
| <b>Bz-III</b>        | -0.2                                                | -0.4                                                   | -0.9                                                       |
|                      |                                                     |                                                        |                                                            |
| <b>Bz-TS2</b>        | +84.1                                               | +83.2                                                  | +68.9                                                      |
| <b>Bz-TS3</b>        | +96.0                                               | +88.4                                                  | +68.5                                                      |
|                      |                                                     |                                                        |                                                            |
| <b>Bz-TS4</b>        | +75.3                                               | +74.7                                                  | +63.2                                                      |
| <b>Bz-TS5</b>        | <b>+25.7</b>                                        | <b>+26.9</b>                                           | <b>+23.7</b>                                               |
| <b>Bz-TS6</b>        | +38.8                                               | +39.7                                                  | +34.8                                                      |
| <b>Bz-IV</b>         | -33.8                                               | -43.5                                                  | -51.0                                                      |
| <b>V + Bz-VI</b>     | +9.8                                                | -49.1                                                  | -75.2                                                      |
|                      |                                                     |                                                        |                                                            |
| <b>VII + Bz-VIII</b> | +585.3                                              | +526.5                                                 | +59.0                                                      |
|                      |                                                     |                                                        |                                                            |

<sup>[a]</sup> Calculated with reference to the best conformer of each species. <sup>[b]</sup> Using gas phase (U)M06-2X/def2-TZVP geometries.

**Table S10.** Energy values for the species shown in Scheme S04.

| System      | $E_{tot}$<br>((U)M06-2X/<br>def2-TZVP) | $H_{298}$<br>((U)M06-2X/<br>def2-TZVP) | $G_{298,qh}$<br>((U)M06-2X/<br>def2-TZVP) | $E_{tot}$<br>(SMD(AcCN)/<br>(U)M06-2X/<br>def2-TZVP) <sup>a</sup> |
|-------------|----------------------------------------|----------------------------------------|-------------------------------------------|-------------------------------------------------------------------|
| <b>Bz-I</b> |                                        |                                        |                                           |                                                                   |

|                |              |                                               |              |              |
|----------------|--------------|-----------------------------------------------|--------------|--------------|
| acob_024fx     | -765.9440732 | -765.6997800                                  | -765.7551451 | -765.9621550 |
| acob_005       | -765.9408350 | -765.6966932                                  | -765.7524975 | -765.9603275 |
| acob_022f      | -765.9359106 | -765.6918939                                  | -765.7478955 | -765.9560205 |
| acob_028r      | -765.9342066 | -765.6903396                                  | -765.7464355 | -765.9553574 |
| acob_010r      | -765.9338503 | -765.6899009                                  | -765.7463851 | -765.9537579 |
| acob_029f      | -765.9333355 | -765.6895186                                  | -765.7463312 | -765.9554004 |
|                |              |                                               |              |              |
| <b>Bz-TS1a</b> |              |                                               |              |              |
| acob_014       | -765.9032670 | -765.6616262<br>(imag=-867 cm <sup>-1</sup> ) | -765.7151871 | -765.9266752 |
| acob_025       | -765.9046970 | -765.6631017<br>(imag=-794 cm <sup>-1</sup> ) | -765.7166388 | -765.9254175 |
|                |              |                                               |              |              |
| <b>Bz-II</b>   |              |                                               |              |              |
| acob_015f      | -765.9399376 | -765.6959602                                  | -765.7494254 | -765.9606935 |
| acob_014f      | -765.9390733 | -765.6951097                                  | -765.7486223 | -765.9612714 |
|                |              |                                               |              |              |
| <b>Bz-TS1b</b> |              |                                               |              |              |
| acob_015       | -765.9035788 | -765.6623722<br>(imag=-967 cm <sup>-1</sup> ) | -765.7152649 | -765.9225759 |
| acob_026       | -765.9011302 | -765.6600780<br>(imag=-988 cm <sup>-1</sup> ) | -765.7132273 | -765.9218181 |
|                |              |                                               |              |              |
| <b>Bz-III</b>  |              |                                               |              |              |
| acob_015r      | -765.9424662 | -765.6998707                                  | -765.7552771 | -765.9607414 |
| aco0b_021f     | -765.9407028 | -765.6981030                                  | -765.7533507 | -765.9588192 |
| acob_010f      | -765.9353186 | -765.6930305                                  | -765.7488493 | -765.9570118 |
| acob_023f      | -765.9333348 | -765.6908637                                  | -765.7468646 | -765.9532113 |
| acob_011f      | -765.9320992 | -765.6897599                                  | -765.7458798 | -765.9519337 |
| acob_028f      | -765.9289920 | -765.6867795                                  | -765.7429219 | -765.9506040 |

|               |                     |                                                      |                     |                     |
|---------------|---------------------|------------------------------------------------------|---------------------|---------------------|
|               |                     |                                                      |                     |                     |
| <b>Bz-TS2</b> |                     |                                                      |                     |                     |
| acob_010      | -765.9091424        | -765.6677533<br>(imag=-247 cm <sup>-1</sup> )        | -765.7234517        | -765.9326739        |
| acob_028      | -765.9044520        | -765.6632199<br>(imag=-271 cm <sup>-1</sup> )        | -765.7190224        | -765.9290241        |
|               |                     |                                                      |                     |                     |
| <b>Bz-TS3</b> |                     |                                                      |                     |                     |
| acob_023      | <b>-765.9060200</b> | <b>-765.6650035</b><br>(imag=-119 cm <sup>-1</sup> ) | <b>-765.7214810</b> | -765.9316827        |
| acob_029      | -765.9057507        | -765.6643709<br>(imag=-97 cm <sup>-1</sup> )         | -765.7206672        | <b>-765.9334879</b> |
| acob_011      | -765.9036389        | -765.6621798<br>(imag=-62 cm <sup>-1</sup> )         | -765.7184788        | -765.9308943        |
|               |                     |                                                      |                     |                     |
| <b>Bz-TS4</b> |                     |                                                      |                     |                     |
| acob_022      | -765.9125327        | -765.6711196<br>(imag=-168 cm <sup>-1</sup> )        | -765.7266840        | -765.9350232        |
| acob_031      | -765.9065197        | -765.6662931<br>(imag=-251 cm <sup>-1</sup> )        | -765.7228686        | -765.9323352        |
|               |                     |                                                      |                     |                     |
| <b>Bz-TS5</b> |                     |                                                      |                     |                     |
| acob_024      | -765.9310681        | -765.6899828<br>(imag=-185 cm <sup>-1</sup> )        | -765.7448970        | -765.9503879        |
|               |                     |                                                      |                     |                     |
| <b>Bz-TS6</b> |                     |                                                      |                     |                     |
| acob_032      | -765.9242916        | -765.6850058<br>(imag=-316 cm <sup>-1</sup> )        | -765.7400154        | -765.9442450        |
| acob_021      | -765.9229836        | -765.6841752<br>(imag=-404 cm <sup>-1</sup> )        | -765.7389737        | -765.9431057        |
|               |                     |                                                      |                     |                     |

|                |                     |                     |                     |                     |
|----------------|---------------------|---------------------|---------------------|---------------------|
| <b>Bz-IV</b>   |                     |                     |                     |                     |
| acob_031r      | <b>-765.9546494</b> | <b>-765.7126471</b> | <b>-765.7717267</b> | <b>-765.9755767</b> |
| acob_021r      | -765.9541307        | -765.7121530        | -765.7706226        | -765.9745463        |
| acob_022r      | -765.9540757        | -765.7121078        | -765.7708915        | -765.9745663        |
| acob_024f      | -765.9540757        | -                   | -                   | -                   |
| acob_032f      | -765.9540757        | -                   | -                   | -                   |
|                |                     |                     |                     |                     |
| <b>V</b>       |                     |                     |                     |                     |
| aco_007        | -345.1158220        | -344.9975398        | -345.0354352        | -345.1303555        |
|                |                     |                     |                     |                     |
| <b>Bz-VI</b>   |                     |                     |                     |                     |
| acob_009       | -420.8199897        | -420.6984864        | -420.7384047        | -420.8334702        |
|                |                     |                     |                     |                     |
| <b>VII</b>     |                     |                     |                     |                     |
| aco_019        | -345.4496196        | -345.3188634        | -345.3569734        | -345.5527916        |
| aco_020        | -345.4473655        | -345.3167618        | -345.3549276        | -345.5519952        |
|                |                     |                     |                     |                     |
| <b>Bz-VIII</b> |                     |                     |                     |                     |
| acob_018       | -420.2657923        | -420.1579989        | -420.1976276        | -420.3587779        |
|                |                     |                     |                     |                     |

<sup>[a]</sup> Using gas phase (U)M06-2X/def2-TZVP geometries.

### 4.3 Chloromethyl

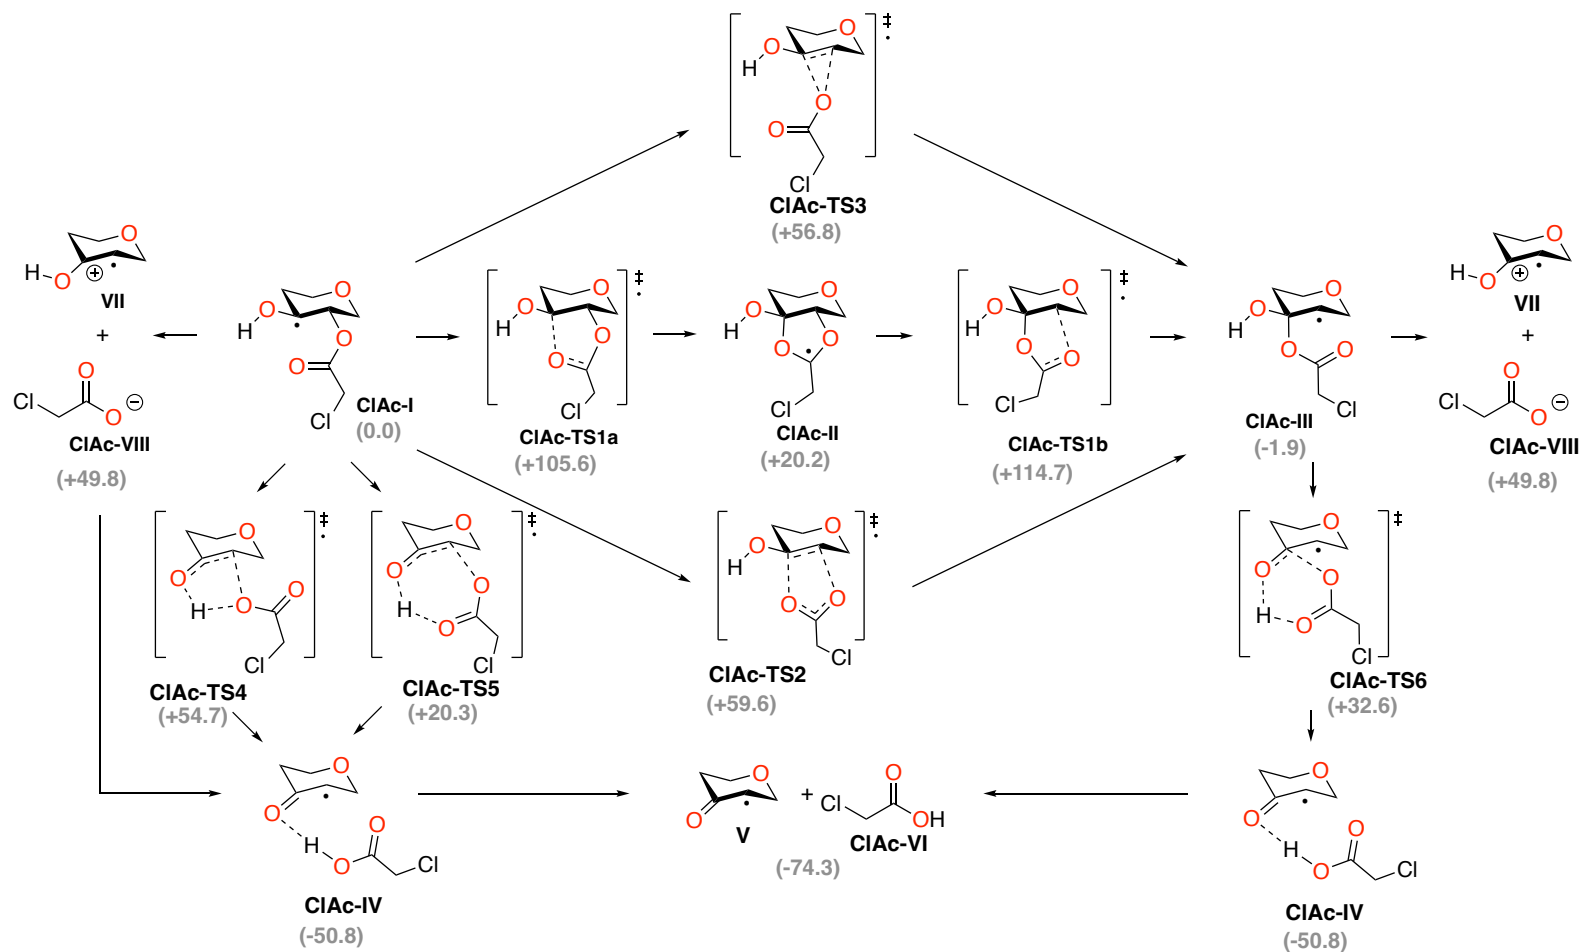

**Scheme S05.** Chloroacetyloxy group migration and elimination pathways for model substrate **ClAc-I**. Gibbs free energy differences ( $\Delta G_{298,gh,sol}$ ) relative to radical **ClAc-I** ((U)M06-2X/def2-TZVP//SMD(acetonitrile) results in kJ/mol) are given in brackets.

**Table S11.** Reaction energies for the species shown in Scheme S05 (in kJ/mol).<sup>[a]</sup>

| System                 | $\Delta H_{298}^{[b]}$<br>((U)M06-2X/<br>def2-TZVP) | $\Delta G_{298,qh}^{[b]}$<br>((U)M06-2X/<br>def2-TZVP) | $\Delta G_{298,qh,sol}^{[b]}$<br>((U)M06-2X/<br>def2-TZVP) |
|------------------------|-----------------------------------------------------|--------------------------------------------------------|------------------------------------------------------------|
| <b>ClAc-I</b>          | 0.0                                                 | 0.0                                                    | 0.0                                                        |
| <b>ClAc-TS1a</b>       | +105.1                                              | +110.4                                                 | +105.6                                                     |
| <b>ClAc-II</b>         | +7.4                                                | +15.4                                                  | +20.2                                                      |
| <b>ClAc-TS1b</b>       | +103.6                                              | +111.4                                                 | +114.7                                                     |
| <b>ClAc-III</b>        | -2.6                                                | -1.8                                                   | -1.9                                                       |
|                        |                                                     |                                                        |                                                            |
| <b>ClAc-TS2</b>        | +73.1                                               | +72.7                                                  | +59.6                                                      |
| <b>ClAc-TS3</b>        | +80.3                                               | +77.8                                                  | +56.8                                                      |
|                        |                                                     |                                                        |                                                            |
| <b>ClAc-TS4</b>        | +65.7                                               | +65.6                                                  | +54.7                                                      |
| <b>ClAc-TS5</b>        | <b>+20.8</b>                                        | <b>+21.8</b>                                           | <b>+20.3</b>                                               |
| <b>ClAc-TS6</b>        | +34.6                                               | +36.5                                                  | +32.6                                                      |
| <b>ClAc-IV</b>         | -37.1                                               | -45.3                                                  | -50.8                                                      |
| <b>V + ClAc-VI</b>     | +9.3                                                | -47.6                                                  | -74.3                                                      |
|                        |                                                     |                                                        |                                                            |
| <b>VII + ClAc-VIII</b> | +991.2                                              | +932.9                                                 | +49.8                                                      |
|                        |                                                     |                                                        |                                                            |

<sup>[a]</sup> Calculated with reference to the best conformer of each species. <sup>[b]</sup> Using gas phase (U)M06-2X/def2-TZVP geometries.

**Table S12.** Energy values for the species shown in Scheme S05.

| System        | $E_{tot}$<br>((U)M06-2X/<br>def2-TZVP) | $H_{298}$<br>((U)M06-2X/<br>def2-TZVP) | $G_{298,qh}$<br>((U)M06-2X/<br>def2-TZVP) | $E_{tot}$<br>(SMD(AcCN)/<br>(U)M06-2X/<br>def2-TZVP) <sup>a</sup> |
|---------------|----------------------------------------|----------------------------------------|-------------------------------------------|-------------------------------------------------------------------|
| <b>ClAc-I</b> |                                        |                                        |                                           |                                                                   |

|                  |              |                                               |              |              |
|------------------|--------------|-----------------------------------------------|--------------|--------------|
| mcl_024f-b       | -1033.805972 | -1033.624257                                  | -1033.676031 | -1033.822682 |
| mcl_024f-c       | -1033.805971 | -1033.624255                                  | -1033.676047 |              |
| mcl_024f-a       | -1033.806229 | -1033.624818                                  | -1033.676468 | -1033.824326 |
| mcl_005-a        | -1033.802851 | -1033.621641                                  | -1033.673794 | -1033.822904 |
| mcl_005-b        | -1033.804418 | -1033.622863                                  | -1033.674621 | -1033.821635 |
| mcl_005-c        | -1033.802557 | -1033.622034                                  | -1033.671916 | -1033.821139 |
| mcl_002-a        | -1033.800046 | -1033.618838                                  | -1033.671005 | -1033.822039 |
| mcl_002-b        | -1033.798806 | -1033.617264                                  | -1033.669834 | -1033.820219 |
| mcl_002-c        | -1033.7997   | -1033.618191                                  | -1033.670663 | -1033.82044  |
| mcl_006-a        | -1033.798201 | -1033.617051                                  | -1033.668949 | -1033.819023 |
| mcl_006-b        | -1033.797886 | -1033.616432                                  | -1033.668537 | -1033.81733  |
| mcl_006-c        | -1033.80066  | -1033.619155                                  | -1033.67056  | -1033.817783 |
| mcl_003-a        | -1033.798407 | -1033.617305                                  | -1033.669239 | -1033.819298 |
| mcl_003-b        | -1033.797077 | -1033.615749                                  | -1033.66807  | -1033.817517 |
| mcl_003-c        | -1033.797651 | -1033.616245                                  | -1033.668588 | -1033.817566 |
|                  |              |                                               |              |              |
| <b>CIAc-TS1a</b> |              |                                               |              |              |
| mcl_014-a        | -1033.760861 | -1033.581755<br>(imag=-868 cm <sup>-1</sup> ) | -1033.631436 | -1033.781923 |
| mcl_014-b        | -1033.763964 | -1033.584795<br>(imag=-886 cm <sup>-1</sup> ) | -1033.634415 | -1033.783889 |
|                  |              |                                               |              |              |
| <b>CIAc-II</b>   |              |                                               |              |              |
| mcl_015r-a       | -1033.801725 | -1033.619704                                  | -1033.668605 | -1033.81904  |
| mcl_015r-b       | -1033.793112 | -1033.611246                                  | -1033.660343 | -1033.810989 |
| mcl_015r-c       | -1033.793178 | -1033.611349                                  | -1033.660528 | -1033.810983 |
| mcl_012-a        | -1033.793083 | -1033.611142                                  | -1033.660187 | -1033.811364 |
| mcl_012-b        | -1033.792753 | -1033.61081                                   | -1033.659874 | -1033.811272 |
| mcl_012-c        | -1033.803953 | -1033.622012                                  | -1033.670598 | -1033.819929 |

|                  |              |                                                |              |              |
|------------------|--------------|------------------------------------------------|--------------|--------------|
| mcl_008-a        | -1033.803953 | -1033.622013                                   | -1033.6706   | -1033.819932 |
| mcl_008-b        | -1033.793346 | -1033.611477                                   | -1033.660581 | -1033.811738 |
| mcl_008-c        | -1033.792847 | -1033.610992                                   | -1033.660168 | -1033.811684 |
| mcl_026r-a       | -1033.791122 | -1033.609319                                   | -1033.658602 | -1033.810912 |
| mcl_026r-b       | -1033.791996 | -1033.610195                                   | -1033.659381 | -1033.810997 |
| mcl_026r-c       | -1033.801106 | -1033.619185                                   | -1033.668262 | -1033.819697 |
| mcl_013-a        | -1033.793346 | -1033.611479                                   | -1033.660586 | -1033.811739 |
| mcl_013-b        | -1033.803953 | -1033.622012                                   | -1033.670597 | -1033.819932 |
| mcl_013-c        | -1033.788485 | -1033.606778                                   | -1033.656513 | -1033.808763 |
| mcl_027-a        | -1033.787473 | -1033.605808                                   | -1033.655632 | -1033.808306 |
| mcl_027-b        | -1033.787951 | -1033.60631                                    | -1033.656087 | -1033.808196 |
| mcl_027-c        | -1033.795349 | -1033.613766                                   | -1033.663813 | -1033.815462 |
|                  |              |                                                |              |              |
| <b>CIAc-TS1b</b> |              |                                                |              |              |
| mcl_015-a        | -1033.764165 | -1033.585345<br>(imag=-996 cm <sup>-1</sup> )  | -1033.63405  | -1033.78089  |
| mcl_015-b        | -1033.758696 | -1033.580329<br>(imag=-957 cm <sup>-1</sup> )  | -1033.62966  | -1033.774436 |
| mcl_015-c        | -1033.764165 | -1033.585343<br>(imag=-996 cm <sup>-1</sup> )  | -1033.634044 | -1033.780889 |
| mcl_026-a        | -1033.762649 | -1033.584018<br>(imag=-234 cm <sup>-1</sup> )  | -1033.632969 | -1033.780574 |
| mcl_026-c        | -1033.762649 | -1033.584019<br>(imag=-1011 cm <sup>-1</sup> ) | -1033.632966 | -1033.780569 |
|                  |              |                                                |              |              |
| <b>CIAc-III</b>  |              |                                                |              |              |
| mcl_016-a        | -1033.805169 | -1033.625533                                   | -1033.676974 | -1033.823496 |
| mcl_016-b        | -1033.805857 | -1033.62582                                    | -1033.677138 | -1033.822376 |
| mcl_016-c        | -1033.805857 | -1033.62582                                    | -1033.67714  | -1033.822375 |



|                  |              |                                               |              |              |
|------------------|--------------|-----------------------------------------------|--------------|--------------|
| mcl_021f-a       | -1033.804073 | -1033.624983                                  | -1033.674161 | -1033.820344 |
| mcl_021f-b       | -1033.804073 | -1033.624984                                  | -1033.674163 | -1033.820344 |
| mcl_021f-c       | -1033.80347  | -1033.62382                                   | -1033.675391 | -1033.821568 |
| mcl_004-a        | -1033.79955  | -1033.61982                                   | -1033.671658 | -1033.819317 |
| mcl_004-b        | -1033.798804 | -1033.619109                                  | -1033.671206 | -1033.818567 |
| mcl_004-c        | -1033.798554 | -1033.619162                                  | -1033.671049 | -1033.820366 |
| mcl_023r-a       | -1033.796206 | -1033.616676                                  | -1033.668813 | -1033.816351 |
| mcl_023r-b       | -1033.795621 | -1033.615763                                  | -1033.667984 | -1033.814694 |
| mcl_023r-c       | -1033.796359 | -1033.61649                                   | -1033.668487 | -1033.814798 |
| mcl_011r-a       | -1033.79526  | -1033.615804                                  | -1033.668273 | -1033.815147 |
| mcl_011r-b       | -1033.795491 | -1033.615663                                  | -1033.667951 | -1033.813581 |
| mcl_011r-c       | -1033.794399 | -1033.615607                                  | -1033.665622 | -1033.81333  |
| mcl_028f-a       | -1033.792153 | -1033.61252                                   | -1033.664678 | -1033.812683 |
| mcl_028f-b       | -1033.793007 | -1033.613322                                  | -1033.665694 | -1033.812334 |
| mcl_028f-c       | -1033.79288  | -1033.613524                                  | -1033.665763 | -1033.814156 |
|                  |              |                                               |              |              |
| <b>ClAc-TS-2</b> |              |                                               |              |              |
| mcl_010-a        | -1033.774829 | -1033.596232<br>(imag=-247 cm <sup>-1</sup> ) | -1033.648196 | -1033.798504 |
| mcl_010-b        | -1033.775559 | -1033.596967<br>(imag=-246 cm <sup>-1</sup> ) | -1033.648779 | -1033.798539 |
| mcl_028-a        | -1033.770457 | -1033.591991<br>(imag=-266 cm <sup>-1</sup> ) | -1033.6438   | -1033.795121 |
| mcl_028-c        | -1033.77101  | -1033.592552<br>(imag=-268 cm <sup>-1</sup> ) | -1033.644383 | -1033.794901 |
|                  |              |                                               |              |              |
| <b>ClAc-TS3</b>  |              |                                               |              |              |
| mcl_029-a        | -1033.77288  | -1033.594191                                  | -1033.646658 | -1033.799005 |

|                 |              |                                               |              |              |
|-----------------|--------------|-----------------------------------------------|--------------|--------------|
|                 |              | (imag=-96 cm <sup>-1</sup> )                  |              |              |
| mcl_029-c       | -1033.771951 | -1033.593243<br>(imag=-94 cm <sup>-1</sup> )  | -1033.645391 | -1033.799495 |
| mcl_023-a       | -1033.771999 | -1033.593796<br>(imag=-120 cm <sup>-1</sup> ) | -1033.646407 | -1033.79756  |
| mcl_023-b       | -1033.772423 | -1033.594219<br>(imag=-125 cm <sup>-1</sup> ) | -1033.646854 | -1033.79664  |
| mcl_011-a       | -1033.769649 | -1033.590992<br>(imag=-66 cm <sup>-1</sup> )  | -1033.643266 | -1033.796995 |
| mcl_011-c       | -1033.768639 | -1033.589753<br>(imag=-65 cm <sup>-1</sup> )  | -1033.642278 | -1033.794983 |
|                 |              |                                               |              |              |
| <b>CIAc-TS4</b> |              |                                               |              |              |
| mcl_022-a       | -1033.777839 | -1033.598824<br>(imag=-181 cm <sup>-1</sup> ) | -1033.650755 | -1033.798793 |
| mcl_022-b       | -1033.778523 | -1033.5998<br>(imag=-162 cm <sup>-1</sup> )   | -1033.651475 | -1033.800788 |
| mcl_022-c       | -1033.778162 | -1033.599202<br>(imag=-156 cm <sup>-1</sup> ) | -1033.651096 | -1033.79934  |
|                 |              |                                               |              |              |
| <b>CIAc-TS5</b> |              |                                               |              |              |
| mcl_024-a       | -1033.795231 | -1033.616628<br>(imag=-163 cm <sup>-1</sup> ) | -1033.667592 | -1033.814454 |
| mcl_024-b       | -1033.795539 | -1033.616879<br>(imag=-177 cm <sup>-1</sup> ) | -1033.668166 | -1033.813891 |
| mcl_024-c       | -1033.795539 | -1033.61688<br>(imag=-177 cm <sup>-1</sup> )  | -1033.668165 | -1033.813891 |
|                 |              |                                               |              |              |
| <b>CIAc-TS6</b> |              |                                               |              |              |
| mcl_021-a       | -1033.788067 | -1033.611653<br>(imag=-342 cm <sup>-1</sup> ) | -1033.662576 | -1033.807225 |

|                  |              |                                               |              |              |
|------------------|--------------|-----------------------------------------------|--------------|--------------|
| mcl_021-b        | -1033.787057 | -1033.610665<br>(imag=-343 cm <sup>-1</sup> ) | -1033.661939 | -1033.807283 |
| mcl_021-c        | -1033.786055 | -1033.609393<br>(imag=-356 cm <sup>-1</sup> ) | -1033.660559 | -1033.805435 |
|                  |              |                                               |              |              |
| <b>CIAc-IV</b>   |              |                                               |              |              |
| mcl_021r-a       | -1033.817873 | -1033.638959                                  | -1033.6936   | -1033.83775  |
| mcl_021r-b       | -1033.816961 | -1033.637605                                  | -1033.691974 | -1033.836226 |
| mcl_021r-c       | -1033.816201 | -1033.637855                                  | -1033.690433 | -1033.835767 |
| mcl_022f-a       | -1033.817791 | -1033.638834                                  | -1033.693718 | -1033.83797  |
| mcl_022f-b       | -1033.816033 | -1033.636749                                  | -1033.69223  | -1033.836133 |
| mcl_022f-c       | -1033.817253 | -1033.638846                                  | -1033.691056 | -1033.835619 |
|                  |              |                                               |              |              |
| <b>V</b>         |              |                                               |              |              |
| mcl_007          | -345.1158220 | -344.9975398                                  | -345.0354352 | -345.1303555 |
|                  |              |                                               |              |              |
| <b>CIAc-VI</b>   |              |                                               |              |              |
| (mcl_009)-a      | -688.6816379 | -688.6236986                                  | -688.6574387 | -688.6941852 |
| (mcl_009)-b      | -688.6816379 | -688.6236986                                  | -688.6574387 | -688.6941852 |
| (mcl_009)-c      | -688.6823292 | -688.6237543                                  | -688.6591453 | -688.6960723 |
|                  |              |                                               |              |              |
| <b>VII</b>       |              |                                               |              |              |
| mcl_019          | -345.4496196 | -345.3188634                                  | -345.3569734 | -345.5527916 |
|                  |              |                                               |              |              |
| <b>CIAc-VIII</b> |              |                                               |              |              |
| mcl_018-a        | -687.9743041 | -687.9284094                                  | -687.9641289 | -688.2255878 |
| mcl_018-b        | -687.9743041 | -687.9284094                                  | -687.9641289 | -688.2255878 |
| mcl_018-c        | -687.9742846 | -687.9284096                                  | -687.9641609 | -688.2255755 |

<sup>[a]</sup> Using gas phase (U)M06-2X/def2-TZVP geometries.

#### 4.4 Trichloromethyl

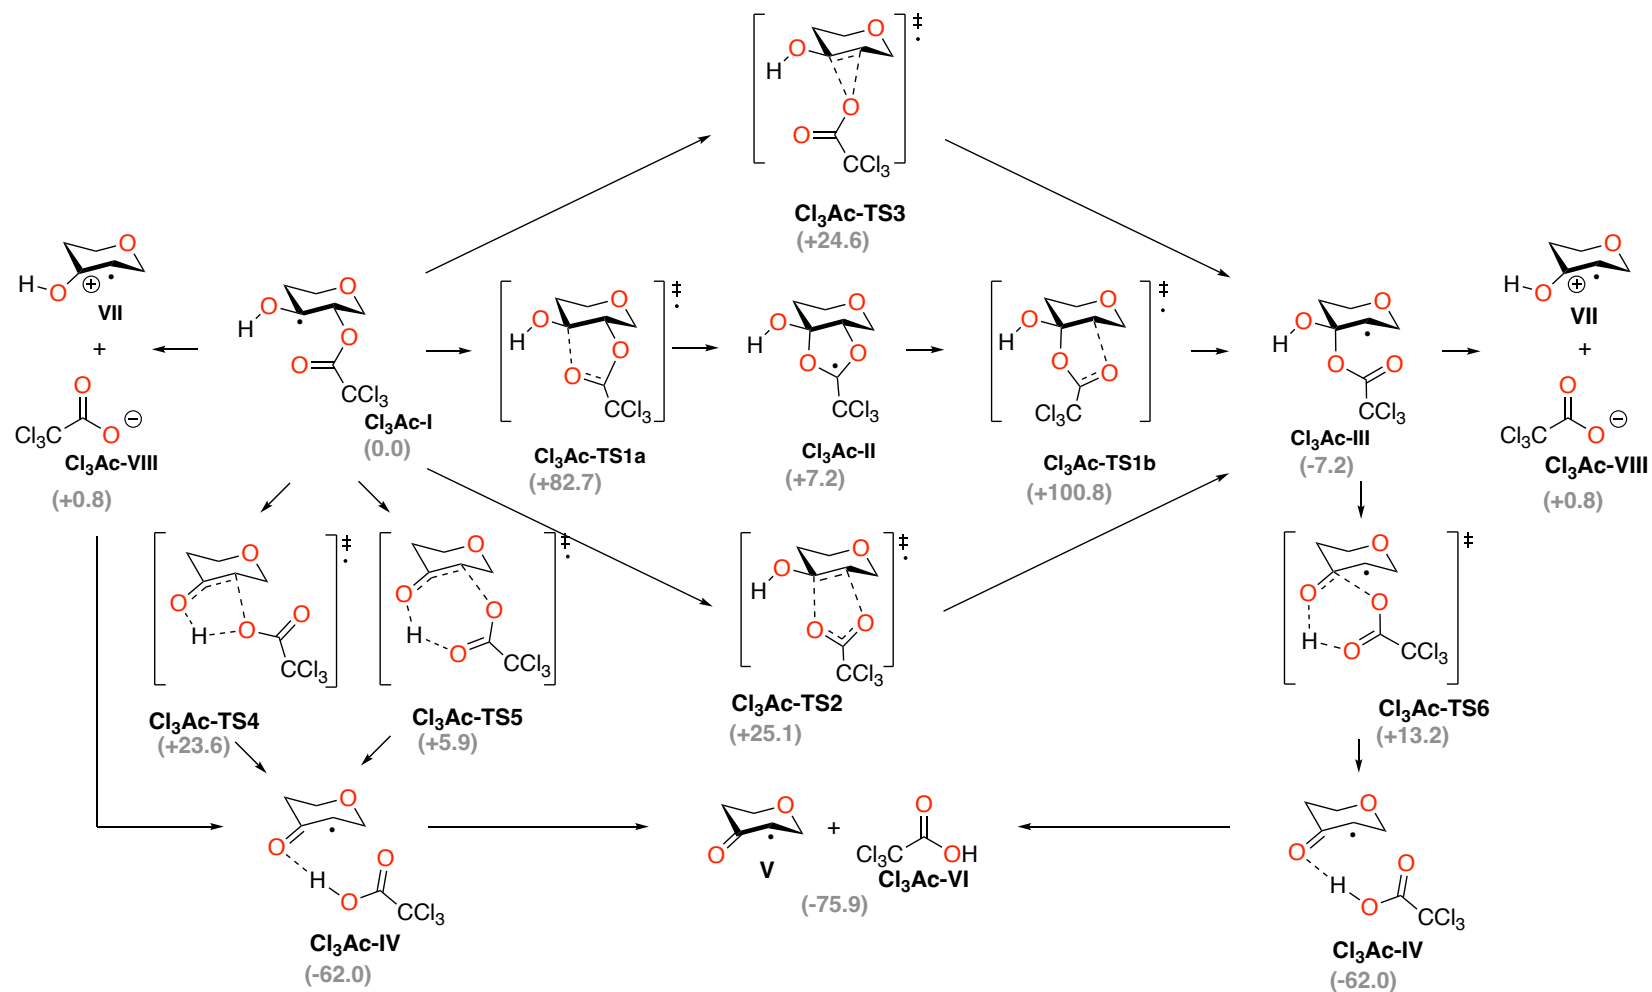

**Scheme S06.** Trichloroacetyloxy group migration and elimination pathways for model substrate **Cl<sub>3</sub>Ac-I**. Gibbs free energy differences ( $\Delta G_{298,qh,sol}$ ) relative to radical **Cl<sub>3</sub>Ac-I** ((U)M06-2X/def2-TZVP//SMD(acetonitrile) results in kJ/mol) are given in brackets.

**Table S13.** Reaction energies for the species shown in Scheme S06 (in kJ/mol).<sup>[a]</sup>

| System                             | $\Delta H_{298}^{[b]}$<br>((U)M06-2X/<br>def2-TZVP) | $\Delta G_{298,qh}^{[b]}$<br>((U)M06-2X/<br>def2-TZVP) | $\Delta G_{298,qh,sol}^{[b]}$<br>((U)M06-2X/<br>def2-TZVP) |
|------------------------------------|-----------------------------------------------------|--------------------------------------------------------|------------------------------------------------------------|
| <b>Cl<sub>3</sub>Ac-I</b>          | 0.0                                                 | 0.0                                                    | 0.0                                                        |
| <b>Cl<sub>3</sub>Ac-TS1a</b>       | +92.5                                               | +97.8                                                  | +82.7                                                      |
| <b>Cl<sub>3</sub>Ac-II</b>         | +0.1                                                | +8.3                                                   | +7.2                                                       |
| <b>Cl<sub>3</sub>Ac-TS1b</b>       | +97.3                                               | +104.7                                                 | +100.8                                                     |
| <b>Cl<sub>3</sub>Ac-III</b>        | -9.5                                                | -8.6                                                   | -7.2                                                       |
|                                    |                                                     |                                                        |                                                            |
| <b>Cl<sub>3</sub>Ac-TS2</b>        | +54.5                                               | +54.1                                                  | +25.1                                                      |
| <b>Cl<sub>3</sub>Ac-TS3</b>        | +59.6                                               | +58.3                                                  | +24.6                                                      |
|                                    |                                                     |                                                        |                                                            |
| <b>Cl<sub>3</sub>Ac-TS4</b>        | +45.4                                               | +45.2                                                  | +23.6                                                      |
| <b>Cl<sub>3</sub>Ac-TS5</b>        | <b>+11.0</b>                                        | <b>+11.9</b>                                           | <b>+5.9</b>                                                |
| <b>Cl<sub>3</sub>Ac-TS6</b>        | +21.8                                               | +24.0                                                  | +13.2                                                      |
| <b>Cl<sub>3</sub>Ac-IV</b>         | -44.4                                               | -53.0                                                  | -62.0                                                      |
| <b>V + Cl<sub>3</sub>Ac-VI</b>     | +6.8                                                | -51.0                                                  | -75.9                                                      |
|                                    |                                                     |                                                        |                                                            |
| <b>VII + Cl<sub>3</sub>Ac-VIII</b> | +986.7                                              | +927.6                                                 | +0.8                                                       |
|                                    |                                                     |                                                        |                                                            |

<sup>[a]</sup> Calculated with reference to the best conformer of each species. <sup>[b]</sup> Using gas phase (U)M06-2X/def2-TZVP geometries.

**Table S14.** Energy values for the species shown in Scheme S06.

| System                    | $E_{tot}$<br>((U)M06-2X/<br>def2-TZVP) | $H_{298}$<br>((U)M06-2X/<br>def2-TZVP) | $G_{298,qh}$<br>((U)M06-2X/<br>def2-TZVP) | $E_{tot}$<br>(SMD(AcCN)/<br>(U)M06-2X/<br>def2-TZVP) <sup>a</sup> |
|---------------------------|----------------------------------------|----------------------------------------|-------------------------------------------|-------------------------------------------------------------------|
| <b>Cl<sub>3</sub>Ac-I</b> |                                        |                                        |                                           |                                                                   |

|                              |              |                                                |              |              |
|------------------------------|--------------|------------------------------------------------|--------------|--------------|
| <b>ccl3o_024f</b>            | -1952.981988 | -1952.818536                                   | -1952.874048 | -1952.996947 |
| ccl3o_005                    | -1952.986414 | -1952.821939                                   | -1952.879142 | -1953.001933 |
| ccl3o_002                    | -1952.982276 | -1952.817857                                   | -1952.875514 | -1953.001664 |
| ccl3o_006                    | -1952.982818 | -1952.818432                                   | -1952.875465 | -1952.998119 |
| ccl3o_003                    | -1952.980907 | -1952.81659                                    | -1952.874225 | -1952.999716 |
|                              |              |                                                |              |              |
| <b>Cl<sub>3</sub>Ac-TS1a</b> |              |                                                |              |              |
| <b>ccl3o_014</b>             | -1952.94886  | -1952.78669<br>(imag=-861 cm <sup>-1</sup> )   | -1952.841888 | -1952.970391 |
|                              |              |                                                |              |              |
| <b>Cl<sub>3</sub>Ac-II</b>   |              |                                                |              |              |
| ccl3o_015r                   | -1952.984732 | -1952.819636                                   | -1952.873959 | -1953.0018   |
| ccl3o_012                    | -1952.98697  | -1952.821919                                   | -1952.875985 | -1953.002762 |
| ccl3o_008                    | -1952.984194 | -1952.819211                                   | -1952.873673 | -1953.002695 |
| ccl3o_026r                   | -1952.984439 | -1952.819377                                   | -1952.873803 | -1953.002716 |
| ccl3o_013                    | -1952.984194 | -1952.819211                                   | -1952.873673 | -1953.002692 |
| ccl3o_027                    | -1952.980062 | -1952.815321                                   | -1952.870575 | -1953.000562 |
|                              |              |                                                |              |              |
| <b>Cl<sub>3</sub>Ac-TS1b</b> |              |                                                |              |              |
| ccl3o_015                    | -1952.946547 | -1952.784871<br>(imag=-970 cm <sup>-1</sup> )  | -1952.839277 | -1952.963312 |
| ccl3o_026                    | -1952.945265 | -1952.783763<br>(imag=-1005 cm <sup>-1</sup> ) | -1952.838597 | -1952.963163 |
|                              |              |                                                |              |              |
| <b>Cl<sub>3</sub>Ac-III</b>  |              |                                                |              |              |
| <b>ccl3o_016</b>             | -1952.988426 | -1952.82556                                    | -1952.882424 | -1953.003649 |
| ccl3o_021f                   | -1952.986579 | -1952.823746                                   | -1952.880699 | -1953.001583 |
| ccl3o_004                    | -1952.983312 | -1952.820645                                   | -1952.877835 | -1953.001733 |
| ccl3o_023r                   | -1952.979296 | -1952.816562                                   | -1952.8742   | -1952.996642 |

|                             |              |                                               |              |              |
|-----------------------------|--------------|-----------------------------------------------|--------------|--------------|
| ccl3o_011r                  | -1952.978478 | -1952.815888                                  | -1952.873931 | -1952.995559 |
| ccl3o_028f                  | -1952.976545 | -1952.814001                                  | -1952.871644 | -1952.995369 |
|                             |              |                                               |              |              |
| <b>Cl<sub>3</sub>Ac-TS2</b> |              |                                               |              |              |
| <b>ccl3o_010</b>            | -1952.962914 | -1952.801182<br>(imag=-195 cm <sup>-1</sup> ) | -1952.858526 | -1952.989716 |
| ccl3o_028                   | -1952.957438 | -1952.795899<br>(imag=-219 cm <sup>-1</sup> ) | -1952.854013 | -1952.985641 |
|                             |              |                                               |              |              |
| <b>Cl<sub>3</sub>Ac-TS3</b> |              |                                               |              |              |
| ccl3o_029                   | -1952.960897 | -1952.79902<br>(imag=-95 cm <sup>-1</sup> )   | -1952.856485 | -1952.989925 |
| ccl3o_023                   | -1952.960585 | -1952.799231<br>(imag=-50 cm <sup>-1</sup> )  | -1952.856922 | -1952.987971 |
| ccl3o_011                   | -1952.958766 | -1952.79676<br>(imag=-42 cm <sup>-1</sup> )   | -1952.853821 | -1952.987459 |
|                             |              |                                               |              |              |
| <b>Cl<sub>3</sub>Ac-TS4</b> |              |                                               |              |              |
| ccl3o_022                   | -1952.96669  | -1952.804659<br>(imag=-115 cm <sup>-1</sup> ) | -1952.861914 | -1952.990705 |
|                             |              |                                               |              |              |
| <b>Cl<sub>3</sub>Ac-TS5</b> |              |                                               |              |              |
| ccl3o_024                   | -1952.98004  | -1952.81775<br>(imag=-152 cm <sup>-1</sup> )  | -1952.874613 | -1952.998082 |
|                             |              |                                               |              |              |
| <b>Cl<sub>3</sub>Ac-TS6</b> |              |                                               |              |              |
| ccl3o_021                   | -1952.973926 | -1952.813626<br>(imag=-256 cm <sup>-1</sup> ) | -1952.870014 | -1952.993804 |
|                             |              |                                               |              |              |
| <b>Cl<sub>3</sub>Ac-IV</b>  |              |                                               |              |              |

|                              |              |              |              |              |
|------------------------------|--------------|--------------|--------------|--------------|
| ccl3o_022f                   | -1953.000732 | -1952.838844 | -1952.899331 | -1953.019908 |
|                              |              |              |              |              |
| <b>V</b>                     |              |              |              |              |
| ccl3o_007                    | -345.1158220 | -344.9975398 | -345.0354352 | -345.1303555 |
|                              |              |              |              |              |
| <b>Cl<sub>3</sub>Ac-VI</b>   |              |              |              |              |
| ccl3o_009                    | -1607.863585 | -1607.821802 | -1607.863141 | -1607.874287 |
|                              |              |              |              |              |
| <b>VII</b>                   |              |              |              |              |
| ccl3o_019                    | -345.4496196 | -345.3188634 | -345.3569734 | -345.5527916 |
|                              |              |              |              |              |
| <b>Cl<sub>3</sub>Ac-VIII</b> |              |              |              |              |
| ccl3o_018                    | -1607.156186 | -1607.127257 | -1607.168872 | -1607.421771 |

<sup>[a]</sup> Using gas phase (U)M06-2X/def2-TZVP geometries.



#### 4.5 Trifluoromethyl

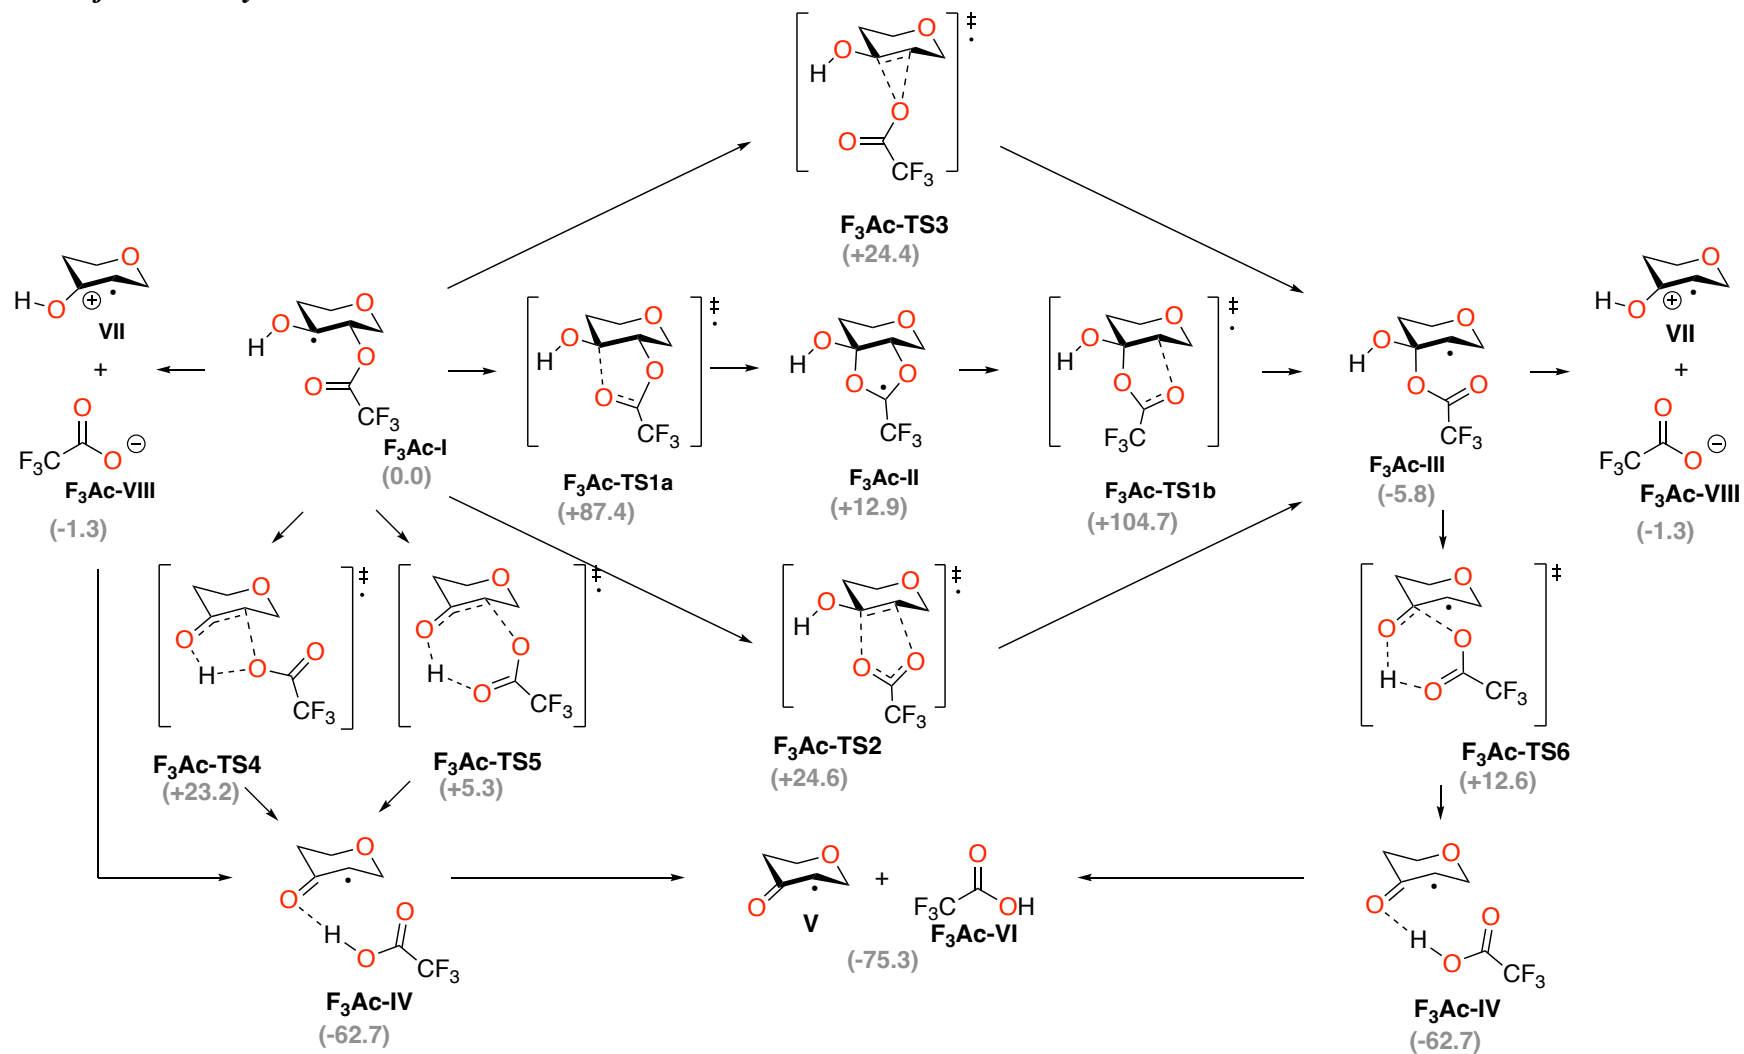

**Scheme S07.** Trifluoroacetyloxy group migration and elimination pathways for model substrate **F<sub>3</sub>Ac-I**. Gibbs free energy differences ( $\Delta G_{298,gh,sol}$ ) relative to radical **F<sub>3</sub>Ac-I** ((U)M06-2X/def2-TZVP//SMD(acetonitrile) results in kJ/mol) are given in brackets.

**Table S15.** Reaction energies for the species shown in Scheme S07 (in kJ/mol).<sup>[a]</sup>

| System                            | $\Delta H_{298}^{[b]}$<br>((U)M06-2X/<br>def2-TZVP) | $\Delta G_{298,qh}^{[b]}$<br>((U)M06-2X/<br>def2-TZVP) | $\Delta G_{298,qh,sol}^{[b]}$<br>((U)M06-2X/<br>def2-TZVP) |
|-----------------------------------|-----------------------------------------------------|--------------------------------------------------------|------------------------------------------------------------|
| <b>F<sub>3</sub>Ac-I</b>          | 0.0                                                 | 0.0                                                    | 0.0                                                        |
| <b>F<sub>3</sub>Ac-TS1a</b>       | +96.2                                               | +98.0                                                  | +87.4                                                      |
| <b>F<sub>3</sub>Ac-II</b>         | +9.8                                                | +17.8                                                  | +12.9                                                      |
| <b>F<sub>3</sub>Ac-TS1b</b>       | +101.9                                              | +108.9                                                 | +104.7                                                     |
| <b>F<sub>3</sub>Ac-III</b>        | -5.3                                                | -5.0                                                   | -5.8                                                       |
|                                   |                                                     |                                                        |                                                            |
| <b>F<sub>3</sub>Ac-TS2</b>        | +55.6                                               | +54.5                                                  | +24.6                                                      |
| <b>F<sub>3</sub>Ac-TS3</b>        | +61.9                                               | +59.2                                                  | +24.4                                                      |
|                                   |                                                     |                                                        |                                                            |
| <b>F<sub>3</sub>Ac-TS4</b>        | +47.0                                               | +46.6                                                  | +23.2                                                      |
| <b>F<sub>3</sub>Ac-TS5</b>        | <b>+12.1</b>                                        | <b>+12.0</b>                                           | <b>+5.3</b>                                                |
| <b>F<sub>3</sub>Ac-TS6</b>        | +25.1                                               | +26.0                                                  | +12.6                                                      |
| <b>F<sub>3</sub>Ac-IV</b>         | -42.9                                               | -51.8                                                  | -62.7                                                      |
| <b>V + F<sub>3</sub>Ac-VI</b>     | +9.3                                                | -48.3                                                  | -75.3                                                      |
|                                   |                                                     |                                                        |                                                            |
| <b>VII + F<sub>3</sub>Ac-VIII</b> | +516.7                                              | +458.8                                                 | -1.3                                                       |
|                                   |                                                     |                                                        |                                                            |

<sup>[a]</sup> Calculated with reference to the best conformer of each species. <sup>[b]</sup> Using gas phase (U)M06-2X/def2-TZVP geometries.

**Table S16.** Energy values for the species shown in Scheme S07.

| System | $E_{tot}$<br>((U)M06-2X/<br>def2-TZVP) | $H_{298}$<br>((U)M06-2X/<br>def2-TZVP) | $G_{298,qh}$<br>((U)M06-2X/<br>def2-TZVP) | $E_{tot}$<br>(SMD(AcCN)/<br>(U)M06-2X/<br>def2-TZVP) <sup>a</sup> |
|--------|----------------------------------------|----------------------------------------|-------------------------------------------|-------------------------------------------------------------------|
|--------|----------------------------------------|----------------------------------------|-------------------------------------------|-------------------------------------------------------------------|

|                             |              |                                              |              |              |
|-----------------------------|--------------|----------------------------------------------|--------------|--------------|
| <b>F<sub>3</sub>Ac-I</b>    |              |                                              |              |              |
| <b>cf3o_024f</b>            | -871.9754764 | -871.8066551                                 | -871.8603783 | -871.9866529 |
| cf3o_005                    | -871.9737848 | -871.8050774                                 | -871.858999  | -871.9863961 |
| cf3o_002                    | -871.9705136 | -871.8018975                                 | -871.8561909 | -871.9862664 |
| cf3o_006                    | -871.9698767 | -871.8012146                                 | -871.8551244 | -871.9832658 |
| cf3o_003                    | -871.9692225 | -871.8006447                                 | -871.8548174 | -871.9844424 |
|                             |              |                                              |              |              |
| <b>F<sub>3</sub>Ac-TS1a</b> |              |                                              |              |              |
| <b>cf3o_014</b>             | -871.936265  | -871.769774<br>(imag=-842 cm <sup>-1</sup> ) | -871.82138   | -871.9535418 |
| cf3o_025                    | -871.938213  | -871.771791<br>(imag=-780 cm <sup>-1</sup> ) | -871.823067  | -871.9519496 |
|                             |              |                                              |              |              |
| <b>F<sub>3</sub>Ac-II</b>   |              |                                              |              |              |
| cf3o_015r                   | -871.9712265 | -871.8018324                                 | -871.852589  | -871.9840268 |
| cf3o_012                    | -871.9722843 | -871.8029234                                 | -871.8535979 | -871.9843843 |
| cf3o_008                    | -871.9707019 | -871.8014352                                 | -871.8524888 | -871.9852363 |
| cf3o_026r                   | -871.970777  | -871.8014442                                 | -871.8522907 | -871.9848634 |
| cf3o_013                    | -871.9707018 | -871.8014345                                 | -871.852489  | -871.9852298 |
| cf3o_027                    | -871.9663774 | -871.7972922                                 | -871.8488439 | -871.9827735 |
|                             |              |                                              |              |              |
| <b>F<sub>3</sub>Ac-TS1b</b> |              |                                              |              |              |
| cf3o_015                    | -871.933739  | -871.767841<br>(imag=-950 cm <sup>-1</sup> ) | -871.818883  | -871.9468529 |
| cf3o_026                    | -871.932497  | -871.766688<br>(imag=-965 cm <sup>-1</sup> ) | -871.817776  | -871.9467982 |
|                             |              |                                              |              |              |
| <b>F<sub>3</sub>Ac-III</b>  |              |                                              |              |              |

|                            |              |                                              |              |              |
|----------------------------|--------------|----------------------------------------------|--------------|--------------|
| <b>cf3o_016</b>            | -871.9758084 | -871.8086579                                 | -871.8622656 | -871.9876934 |
| cf3o_021f                  | -871.9741279 | -871.8070165                                 | -871.8603714 | -871.9859001 |
| cf3o_004                   | -871.9708503 | -871.803983                                  | -871.8578137 | -871.9859393 |
| cf3o_023r                  | -871.9673148 | -871.8003222                                 | -871.854447  | -871.9812529 |
| cf3o_011r                  | -871.9666438 | -871.799835                                  | -871.8541202 | -871.9802929 |
| cf3o_028f                  | -871.9644219 | -871.797591                                  | -871.8517858 | -871.9797664 |
|                            |              |                                              |              |              |
| <b>F<sub>3</sub>Ac-TS2</b> |              |                                              |              |              |
| <b>cf3o_010</b>            | -871.951503  | -871.785469<br>(imag=-201 cm <sup>-1</sup> ) | -871.839631  | -871.9744422 |
| cf3o_028                   | -871.946562  | -871.780736<br>(imag=-219 cm <sup>-1</sup> ) | -871.834971  | -871.9708178 |
|                            |              |                                              |              |              |
| <b>F<sub>3</sub>Ac-TS3</b> |              |                                              |              |              |
| cf3o_029                   | -871.948998  | -871.782836<br>(imag=-99 cm <sup>-1</sup> )  | -871.837195  | -871.9744456 |
| cf3o_023                   | -871.948748  | -871.783077<br>(imag=-86 cm <sup>-1</sup> )  | -871.837839  | -871.9727427 |
| cf3o_011                   | -871.946156  | -871.780013<br>(imag=-70 cm <sup>-1</sup> )  | -871.834729  | -871.9721898 |
|                            |              |                                              |              |              |
| <b>F<sub>3</sub>Ac-TS4</b> |              |                                              |              |              |
| cf3o_022                   | -871.955057  | -871.788748<br>(imag=-127 cm <sup>-1</sup> ) | -871.842629  | -871.9755341 |
|                            |              |                                              |              |              |
| <b>F<sub>3</sub>Ac-TS5</b> |              |                                              |              |              |
| cf3o_024                   | -871.968618  | -871.802049<br>(imag=-153 cm <sup>-1</sup> ) | -871.855571  | -871.9829721 |
|                            |              |                                              |              |              |

|                             |              |                                              |              |              |
|-----------------------------|--------------|----------------------------------------------|--------------|--------------|
| <b>F<sub>3</sub>Ac-TS6</b>  |              |                                              |              |              |
| cf3o_021                    | -871.961688  | -871.797078<br>(imag=-263 cm <sup>-1</sup> ) | -871.850493  | -871.9783358 |
|                             |              |                                              |              |              |
| <b>F<sub>3</sub>Ac-IV</b>   |              |                                              |              |              |
| cf3o_021r                   | -871.9889742 | -871.8228224                                 | -871.8793383 | -872.0038835 |
| cf3o_022f                   | -871.9890951 | -871.8230136                                 | -871.8801027 | -872.0048235 |
|                             |              |                                              |              |              |
| <b>F<sub>3</sub>Ac-V</b>    |              |                                              |              |              |
| cf3o_007                    | -345.1158220 | -344.9975398                                 | -345.0354352 | -345.1303555 |
|                             |              |                                              |              |              |
| <b>F<sub>3</sub>Ac-VI</b>   |              |                                              |              |              |
| cf3o_009                    | -526.851572  | -526.805578                                  | -526.8433206 | -526.8589014 |
|                             |              |                                              |              |              |
| <b>F<sub>3</sub>Ac-VII</b>  |              |                                              |              |              |
| cf3o_019                    | -345.4496196 | -345.3188634                                 | -345.3569734 | -345.5527916 |
|                             |              |                                              |              |              |
| <b>F<sub>3</sub>Ac-VIII</b> |              |                                              |              |              |
| cf3o_018                    | -526.3238902 | -526.2910025                                 | -526.3286389 | -526.4075287 |

<sup>[a]</sup> Using gas phase (U)M06-2X/def2-TZVP geometries.

## 4.6 Tosyl

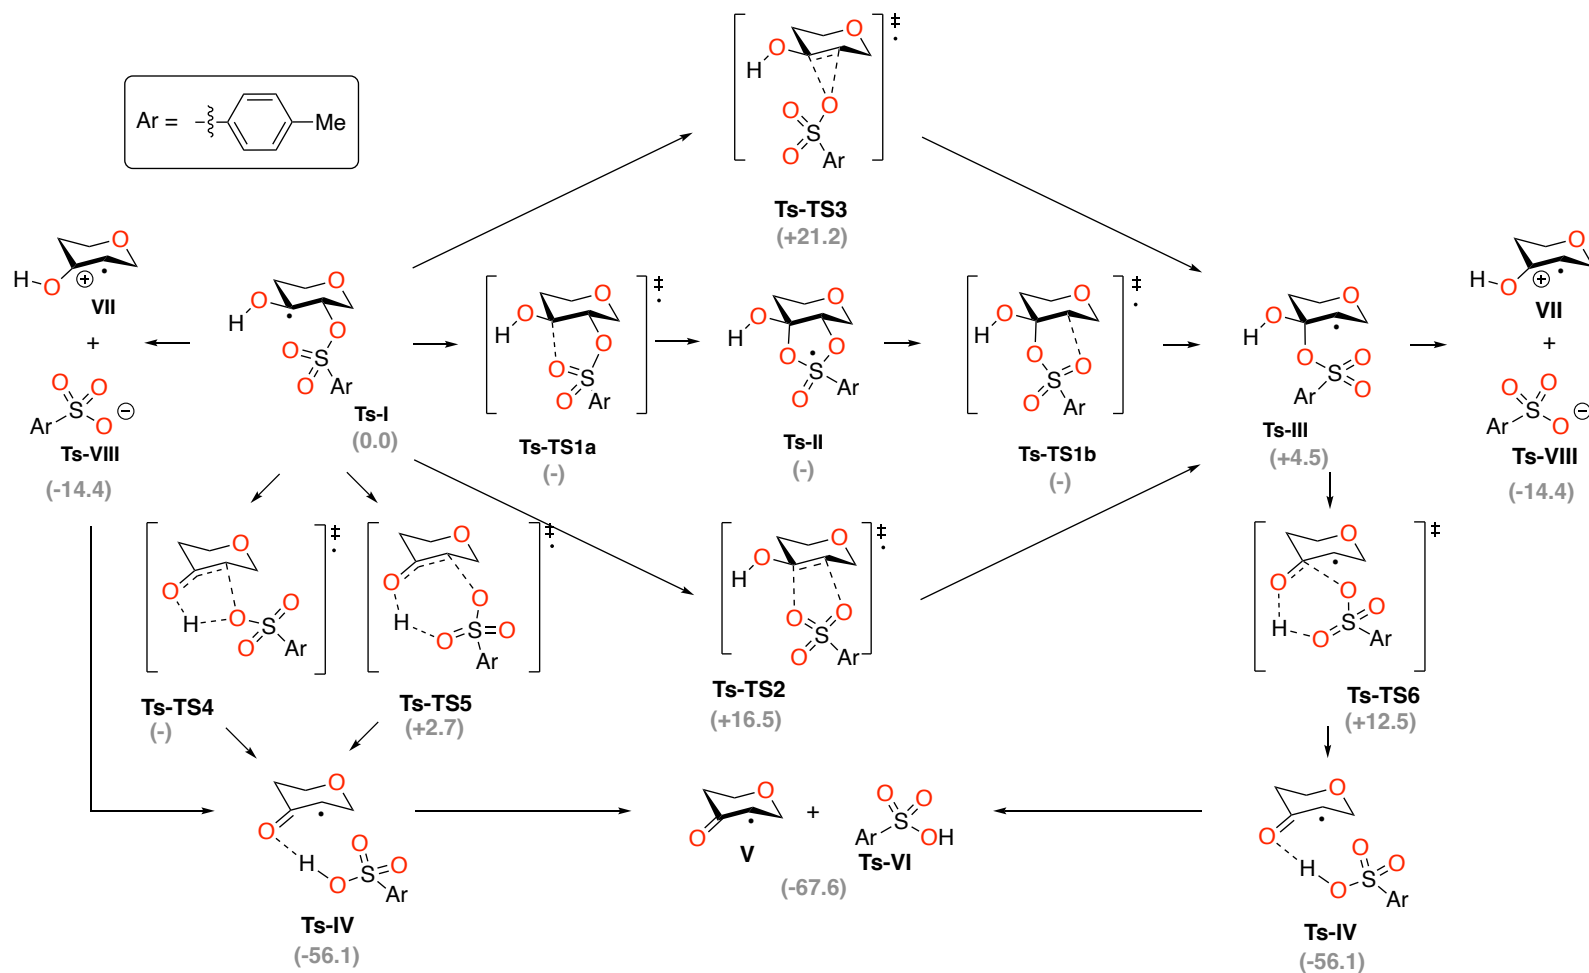

**Scheme S08.** Tosyl group migration and elimination pathways for model substrate **Ts-I**. Gibbs free energy differences ( $\Delta G_{298,qh,sol}$ ) relative to radical **Ts-I** ((U)M06-2X/def2-TZVP//SMD(acetonitrile) results in kJ/mol) are given in brackets.

**Table S17.** Reaction energies for the species shown in Scheme S08 (in kJ/mol).<sup>[a]</sup>

| System               | $\Delta H_{298}^{[b]}$<br>(M06-2X/<br>def2-TZVP) | $\Delta G_{298,qh}^{[b]}$<br>(M06-2X/<br>def2-TZVP) | $\Delta G_{298,qh,sol}^{[b]}$<br>(M06-2X/<br>def2-TZVP) | $\Delta G_{298,qh,sol}^{[c]}$<br>(M06-2X/<br>def2-TZVP) |
|----------------------|--------------------------------------------------|-----------------------------------------------------|---------------------------------------------------------|---------------------------------------------------------|
| <b>Ts-I</b>          | 0.0                                              | 0.0                                                 | 0.0                                                     | 0.0                                                     |
| <b>Ts-TS1a</b>       | -                                                | -                                                   | -                                                       | -                                                       |
| <b>Ts-II</b>         | -                                                | -                                                   | -                                                       | -                                                       |
| <b>Ts-TS1b</b>       | -                                                | -                                                   | -                                                       | -                                                       |
| <b>Ts-III</b>        | -0.4                                             | +1.2                                                | +4.5                                                    | +3.1                                                    |
|                      |                                                  |                                                     |                                                         |                                                         |
| <b>Ts-TS2</b>        | +48.4                                            | +49.0                                               | +16.5                                                   | -                                                       |
| <b>Ts-TS3</b>        | +54.0                                            | +54.2                                               | +21.2                                                   | -                                                       |
|                      |                                                  |                                                     |                                                         |                                                         |
| <b>Ts-TS4</b>        | -                                                | -                                                   | -                                                       | -                                                       |
| <b>Ts-TS5</b>        | +8.5                                             | +8.9                                                | <b>+2.7</b>                                             | +5.5                                                    |
| <b>Ts-TS6</b>        | +15.0                                            | +16.7                                               | +12.5                                                   | -                                                       |
| <b>Ts-IV</b>         | -39.3                                            | -46.1                                               | -56.1                                                   | -61.6                                                   |
| <b>V + Ts-VI</b>     | +20.9                                            | -39.5                                               | -64.5                                                   | -57.0                                                   |
|                      |                                                  |                                                     |                                                         |                                                         |
| <b>VII + Ts-VIII</b> | +496.2                                           | +436.4                                              | -14.4                                                   | -4.0                                                    |

<sup>[a]</sup> Calculated with reference to the best conformer of each species.

<sup>[b]</sup> Using gas phase (U)M06-2X/def2-TZVP geometries.

<sup>[c]</sup> Using solution phase SMD(AcCN)/(U)M06-2X/def2-TZVP geometries.

**Table S18.** Energy values for the species shown in Scheme S08.

| System | $E_{tot}$ | $H_{298}$ | $G_{298,qh}$ | $E_{tot}$ |
|--------|-----------|-----------|--------------|-----------|
|--------|-----------|-----------|--------------|-----------|

|                   | ((U)M06-2X/<br>def2-TZVP) | ((U)M06-2X/<br>def2-TZVP)                       | ((U)M06-2X/<br>def2-TZVP) | (SMD(AcCN)/<br>(U)M06-2X/<br>def2-TZVP) <sup>a</sup> |
|-------------------|---------------------------|-------------------------------------------------|---------------------------|------------------------------------------------------|
| <b>Ts-I</b>       |                           |                                                 |                           |                                                      |
| <b>acoc_034r</b>  | <b>-1240.5352481</b>      | -1240.2605480                                   | -1240.323089              | <b>-1240.5600523</b>                                 |
| acoc_025fo        | -1240.5351436             | -1240.2605516                                   | -1240.3232717             | -1240.5585967                                        |
| acoc_003r         | -1240.5339315             | -1240.2590468                                   | -1240.3211663             | -1240.5576437                                        |
| acoc_002          | -1240.5331516             | -1240.2583994                                   | -1240.3210744             | -1240.5559220                                        |
| acoc_001          | -1240.5331266             | -1240.2583542                                   | -1240.3213057             | -1240.5558915                                        |
| acoc_011          | -1240.5308510             | -1240.2565312                                   | -1240.3185414             | -1240.5541248                                        |
| acoc_020          | -1240.5279146             | -1240.2530400                                   | -1240.3157632             | -1240.5503152                                        |
| acoc_027fo        | -1240.5255547             | -1240.2510769                                   | -1240.3134502             | -1240.5514554                                        |
| acoc_022re        | -1240.5222934             | -1240.2479421                                   | -1240.3115957             | -1240.5463931                                        |
|                   |                           |                                                 |                           |                                                      |
| <b>Ts-III</b>     |                           |                                                 |                           |                                                      |
| <b>acoc_021re</b> | -1240.5338039             | -1240.2607124                                   | -1240.3223993             | -1240.5576006                                        |
| acoc_023fo        | -1240.5330710             | -1240.2600041                                   | -1240.3228110             | -1240.5551594                                        |
| acoc_013          | -1240.5330702             | -1240.2600046                                   | -1240.3225041             | -1240.5551609                                        |
| acoc_006fo        | -1240.5330702             | -                                               | -                         | -                                                    |
| acoc_014f         | -1240.5274505             | -1240.2545329                                   | -1240.3164226             | -1240.5543606                                        |
| acoc_022fo        | -1240.5257373             | -1240.2529527                                   | -1240.3160464             | -1240.5514617                                        |
| acoc_026re        | -1240.5233328             | -1240.2504399                                   | -1240.3129462             | -1240.5474182                                        |
| acoc_027re        | -1240.5205693             | -1240.2476380                                   | -1240.3100134             | -1240.5470817                                        |
|                   |                           |                                                 |                           |                                                      |
| <b>Ts-TS2</b>     |                           |                                                 |                           |                                                      |
| acoc_022          | -1240.5144494             | -1240.2421058<br>(imag=-45.8 cm <sup>-1</sup> ) | -1240.3045958             | -1240.5514798                                        |
|                   |                           |                                                 |                           |                                                      |
| <b>Ts-TS3</b>     |                           |                                                 |                           |                                                      |
| acoc_006          | -1240.5138515             | -1240.2416967<br>(imag=-46.2 cm <sup>-1</sup> ) | -1240.3047152             | -1240.5495724                                        |



|                  |               |                                                  |               |                |
|------------------|---------------|--------------------------------------------------|---------------|----------------|
| acoc_026         | -1240.5123341 | -1240.2399700<br>(imag=-54.2 cm <sup>-1</sup> )  | -1240.3026325 | -1240.5494994  |
| <b>acoc_027</b>  | -1240.5085114 | -1240.2362491<br>(imag=-31.1 cm <sup>-1</sup> )  | -1240.2981093 | -1240.5502042  |
|                  |               |                                                  |               |                |
| <b>Ts-TS4</b>    |               |                                                  |               |                |
|                  |               |                                                  |               |                |
| <b>Ts-TS5</b>    |               |                                                  |               |                |
| <b>acoc_025</b>  | -1240.5298253 | -1240.2573282<br>(imag=-217.2 cm <sup>-1</sup> ) | -1240.3198989 | -1240.55678292 |
| acoc_017         | -1240.5268295 | -1240.2547985<br>(imag=-221.7 cm <sup>-1</sup> ) | -1240.3154635 | -1240.55186437 |
| acoc_003         | -1240.5263289 | -1240.2532819<br>(imag=-217.9 cm <sup>-1</sup> ) | -1240.3157663 | -1240.55254363 |
| acoc_005         | -1240.5263290 | -                                                | -             | -              |
|                  |               |                                                  |               |                |
| <b>Ts-TS6</b>    |               |                                                  |               |                |
| acoc_023         | -1240.5264638 | -1240.2548314<br>(imag=-238.7 cm <sup>-1</sup> ) | -1240.3169205 | -1240.55139180 |
| <b>acoc_021</b>  | -1240.5250330 | -1240.2534681<br>(imag=-238.3 cm <sup>-1</sup> ) | -1240.3148276 | -1240.55333296 |
| acoc_014         | -1240.5105320 | -1240.2381849<br>(imag=-96.4 cm <sup>-1</sup> )  | -1240.3006414 | -1240.55159222 |
|                  |               |                                                  |               |                |
| <b>Ts-IV</b>     |               |                                                  |               |                |
| acoc_017re       | -1240.5476360 | -1240.2755302                                    | -1240.3404013 | -1240.5728096  |
| acoc_019         | -1240.5469262 | -1240.2753786                                    | -1240.3408385 | -1240.5705354  |
| <b>acoc_009r</b> | -1240.5468806 | -1240.2747918                                    | -1240.3386940 | -1240.5774564  |
| acoc_021fo       | -1240.5462133 | -1240.2740335                                    | -1240.3380161 | -1240.5720761  |
| acoc_025re       | -1240.5459560 | -1240.2743978                                    | -1240.3398376 | -1240.5728249  |
| acoc_014r        | -1240.5442376 | -1240.2725172                                    | -1240.3372786 | -1240.5723262  |

|                |              |              |              |               |
|----------------|--------------|--------------|--------------|---------------|
| <b>V</b>       |              |              |              |               |
| aco_007        | -345.1158220 | -344.9975398 | -345.0354352 | -345.1303555  |
|                |              |              |              |               |
| <b>Ts-VI</b>   |              |              |              |               |
| acoc_004       | -895.4067935 | -895.2550492 | -895.3028841 | -895.42640624 |
|                |              |              |              |               |
| <b>VII</b>     |              |              |              |               |
| aco_019        | -345.4496196 | -345.3188634 | -345.3569734 | -345.5527916  |
| aco_020        | -345.4473655 | -345.3167618 | -345.3549276 | -345.5519952  |
|                |              |              |              |               |
| <b>Ts-VIII</b> |              |              |              |               |
| acoc_018       | -894.8920480 | -894.7527043 | -894.8000807 | -894.98518355 |
|                |              |              |              |               |

<sup>[a]</sup> Using gas phase (U)M06-2X/def2-TZVP geometries.

The influence of solvation was assessed for tosyl group migration and elimination pathways through reoptimization of intermediates and transition states at the SMD(AcCN)/(U)M06-2X/def2-TZVP level of theory. These results show minimal deviation to those calculated with the gas phase geometries.

**Table S19.** Energy values for the species shown in Scheme S08.

| System              | $E_{tot}$<br>(SMD(AcCN)/<br>M06-2X/<br>def2-TZVP) <sup>[a]</sup> | $H_{298}$<br>(SMD(AcCN)/<br>M06-2X/<br>def2-TZVP) <sup>[a]</sup> | $G_{298,qh}$<br>(SMD(AcCN)/<br>M06-2X/<br>def2-TZVP) <sup>[a]</sup> |
|---------------------|------------------------------------------------------------------|------------------------------------------------------------------|---------------------------------------------------------------------|
| <b>Ts-I</b>         |                                                                  |                                                                  |                                                                     |
| <b>acocsol_034r</b> | <b>-1240.56074420</b>                                            | <b>-1240.286866</b>                                              | <b>-1240.346148</b>                                                 |
| acocsol_001         | -1240.55896252                                                   | -1240.285272                                                     | -1240.345063                                                        |
| acocsol_017         | -1240.55817853                                                   | -1240.284066                                                     | -1240.343187                                                        |
| acocsol_012r        | -1240.55817852                                                   | -1240.284067                                                     | -1240.343188                                                        |
| acocsol_019         | -1240.55627242                                                   | -1240.282272                                                     | -1240.341776                                                        |

|                     |                       |                                                      |                     |
|---------------------|-----------------------|------------------------------------------------------|---------------------|
| acocsol_018         | -1240.55626904        | -1240.282293                                         | -1240.342708        |
| acocsol_010f        | -1240.55626449        | -1240.282265                                         | -1240.341896        |
| acocsol_020         | -1240.55487658        | -1240.281557                                         | -1240.340964        |
| acocsol_021         | -1240.55152069        | -1240.277924                                         | -1240.338204        |
| acocsol_022         | -1240.55264485        | -1240.278721                                         | -1240.338167        |
| acocsol_023         | -1240.55262799        | -1240.278730                                         | -1240.338438        |
|                     |                       |                                                      |                     |
| <b>Ts-TS5</b>       |                       |                                                      |                     |
| <b>acocsol_034</b>  | <b>-1240.55758248</b> | <b>-1240.285218</b><br>(imag=-293 cm <sup>-1</sup> ) | <b>-1240.344068</b> |
| acocsol_035         | -1240.55758243        | -                                                    | -                   |
| acocsol_024         | -1240.55692210        | -1240.284675 (imag=-<br>284 cm <sup>-1</sup> )       | -1240.343864        |
| acocsol_012         | -1240.55290323        | -1240.280390<br>(imag=-271 cm <sup>-1</sup> )        | -1240.339776        |
| acocsol_011         | -1240.55290324        | -1240.280392<br>(imag=-270 cm <sup>-1</sup> )        | -1240.339786        |
| acocsol_010         | -1240.55203131        | -1240.279605<br>(imag=-242 cm <sup>-1</sup> )        | -1240.339011        |
|                     |                       |                                                      |                     |
| <b>Ts-IV</b>        |                       |                                                      |                     |
| <b>acocsol_034f</b> | <b>-1240.58038213</b> | <b>-1240.309560</b>                                  | <b>-1240.369608</b> |
| acocsol_007         | -1240.57967219        | -1240.308923                                         | -1240.369131        |
| acocsol_024r        | -1240.57639881        | -1240.305984                                         | -1240.368473        |
| acocsol_005         | -1240.57639634        | -1240.305971                                         | -1240.368466        |
| acocsol_033         | -1240.57635796        | -1240.306941                                         | -1240.367568        |
| acocsol_014f        | -1240.57631397        | -1240.305967                                         | -1240.368826        |
| acocsol_032         | -1240.57612064        | -1240.305610                                         | -1240.368187        |
| acocsol_013r        | -1240.57612054        | -1240.306556                                         | -1240.366685        |
| acocsol_015r        | -1240.57612057        | -1240.305614                                         | -1240.368240        |
|                     |                       |                                                      |                     |

|                |                       |                     |                     |
|----------------|-----------------------|---------------------|---------------------|
| <b>V</b>       |                       |                     |                     |
| aco_007sol     | -345.1305303          | -345.0124047        | -345.0472302        |
|                |                       |                     |                     |
| <b>Ts-VI</b>   |                       |                     |                     |
| acocsol_009    | <b>-895.427339880</b> | -895.276134         | <b>-895.320630</b>  |
| acocsol_016    | -895.427301315        | <b>-895.277122</b>  | -895.320010         |
|                |                       |                     |                     |
| <b>VII</b>     |                       |                     |                     |
| aco_019sol     | <b>-345.5531468</b>   | <b>-345.4224408</b> | <b>-345.4574849</b> |
| aco_020sol     | -345.5523892          | -345.4216836        | -345.4567290        |
|                |                       |                     |                     |
| <b>Ts-VIII</b> |                       |                     |                     |
| acocsol_008    | -894.985926190        | -894.846514         | -894.890176         |
|                |                       |                     |                     |

<sup>[a]</sup> Using solution phase SMD(AcCN)/M06-2X/def2-TZVP geometries.

## 5.0 Calculated Relative pK<sub>a</sub> Data

Relative pK<sub>a</sub> values in acetonitrile were calculated ((U)M06-2X/def2-TZVP//SMD(acetonitrile) level of theory) for acid leaving groups according to the proton exchange with acetonitrile solvent as depicted:

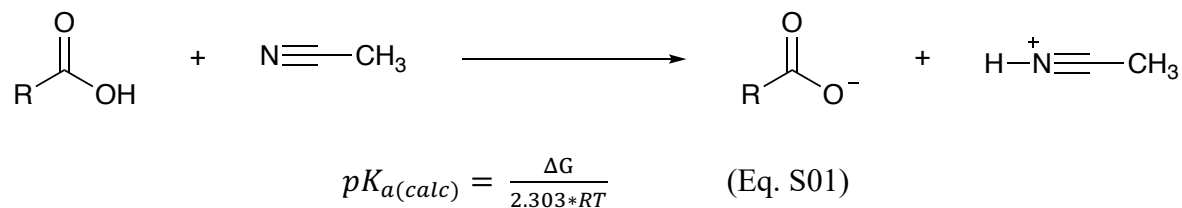

Calculated pK<sub>a</sub> values were adjusted by benchmarking against experimental pK<sub>a</sub> data in acetonitrile for acids where it was available (acetic acid, benzoic acid, toluenesulfonic acid).<sup>10</sup> The equation resulting from the linear relationship between calculated and experimental data for these acids (Equation S01) was then used to adjust the calculated values to obtain relative pK<sub>a</sub> data.

**Table S20.** Experimental and calculated ((U)M06-2X/def2-TZVP//SMD(acetonitrile) level of theory) pK<sub>a</sub> data for leaving groups in acetonitrile.

| Acid                               | Experimental pK <sub>a</sub><br>(acetonitrile) | Calculated pK <sub>a</sub><br>(unadjusted) | Calculated pK <sub>a</sub><br>(adjusted) |
|------------------------------------|------------------------------------------------|--------------------------------------------|------------------------------------------|
| AcOH                               | 23.5                                           | 34.3                                       | 23.8                                     |
| PivOH                              | –                                              | 34.5                                       | 24.0                                     |
| BzOH                               | 21.5                                           | 31.2                                       | 21.2                                     |
| Cl <sub>3</sub> CCO <sub>2</sub> H | –                                              | 21.1                                       | 12.6                                     |
| F <sub>3</sub> CCO <sub>2</sub> H  | –                                              | 20.7                                       | 12.2                                     |
| TsOH                               | 8.5                                            | 16.5                                       | 8.6                                      |

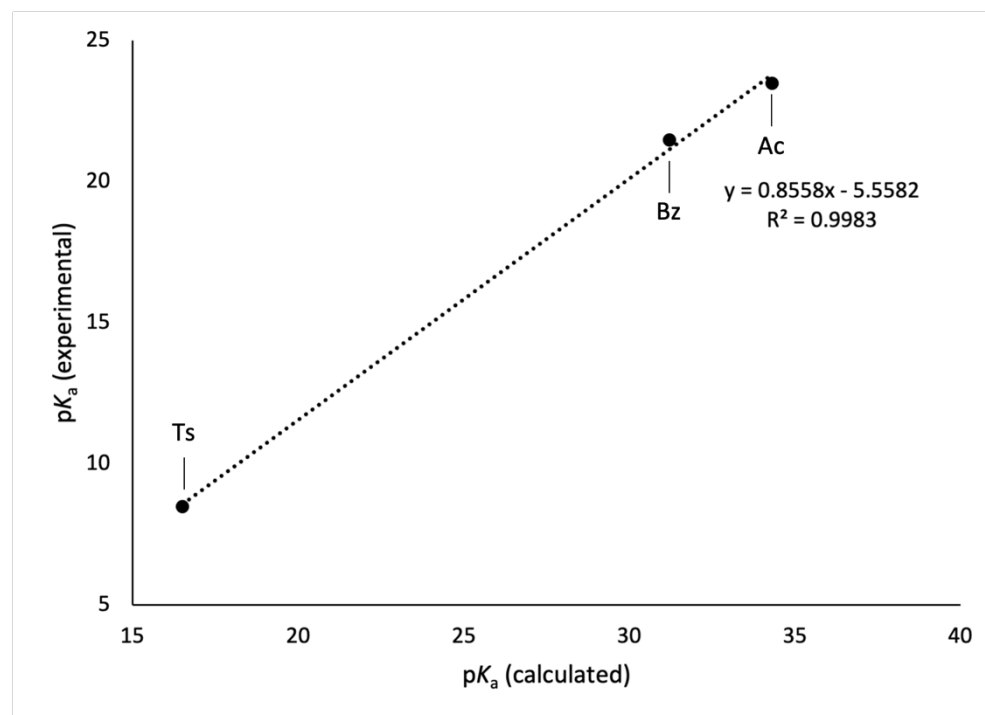

**Figure S04.** Calculated vs experimental  $pK_a$  for acetic acid, benzoic acid, and toluenesulfonic acid.

$$pK_{a(\text{calc,adjusted})} = 0.8558 * (pK_{a(\text{calc})}) - 5.5582 \quad (\text{Eq. S02})$$

A linear relationship between the free energy of activation of **TS5** and the calculated  $pK_a$  of the leaving group in acetonitrile was observed (Figure S05a.)

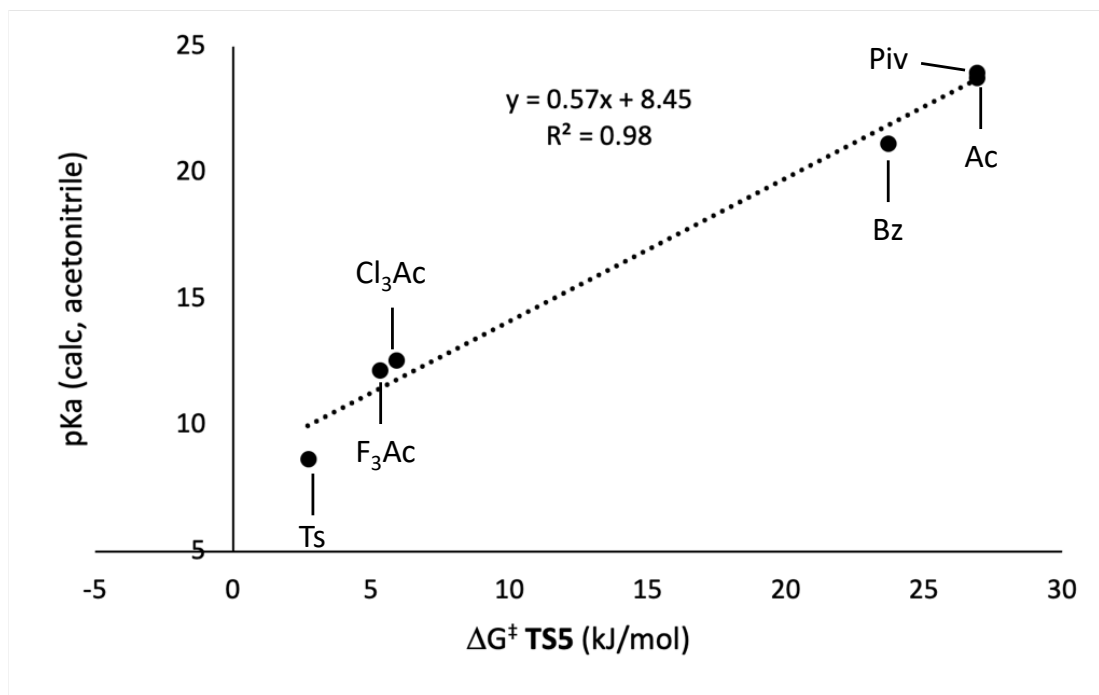

**Figure S05a.** Free energy of activation ( $\Delta G^\ddagger$ , kJ/mol) for **TS5** vs the calculated  $pK_a$  of the leaving group in acetonitrile for leaving groups acetyl, pivaloyl, benzoyl, trichloroacetyl, trifluoroacetyl, and tosyl.

A similarly good correlation is observed between the free energy of activation of **TS5** and the reaction energy for heterolytic dissociation  $\Delta G(\text{VII} + \text{VIII})$ , again in full support of the charge-separating character in the elimination transition state **TS5**.

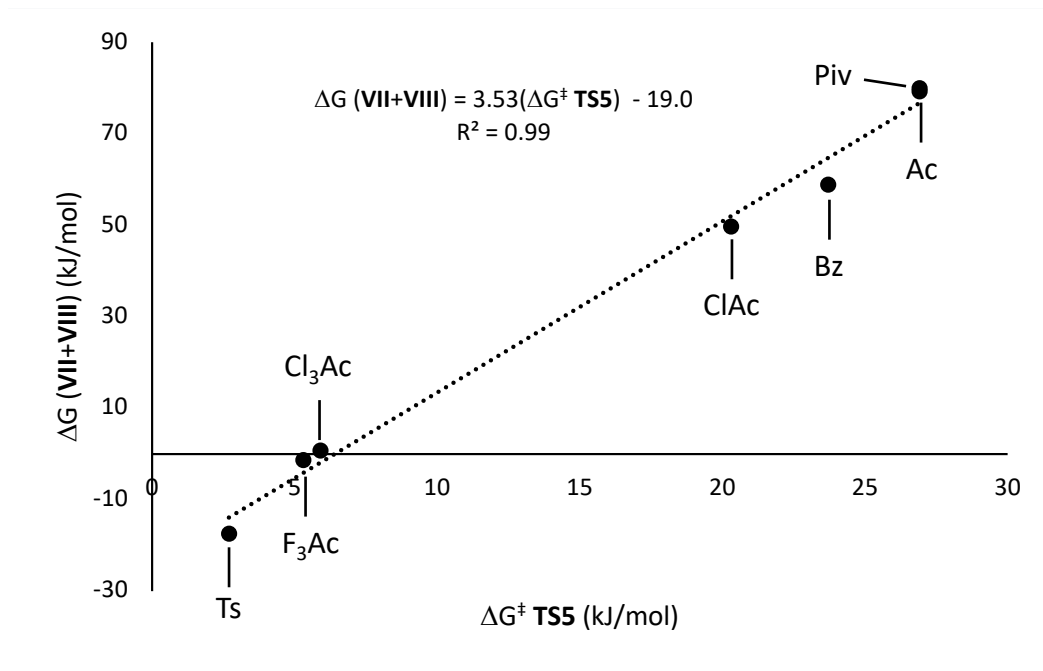

**Figure S05b.** Free energy of activation ( $\Delta G^\ddagger$ , kJ/mol) for **TS5** vs the reaction energy for heterolytic dissociation  $\Delta G(\text{VII} + \text{VIII})$  in acetonitrile for leaving groups acetyl, pivaloyl, benzoyl, trichloroacetyl, trifluoroacetyl, and tosyl.



## 6.0 Experimental Results

### 6.1 General Information

#### Materials

Stainless steel needles and syringes were used to transfer air and moisture sensitive liquids. Schlenk flasks and 4 Å molecular sieves were stored at 140 °C for at least 24 hours before use. Acetonitrile was HPLC grade and purified using a solvent purification system equipped with columns of activated alumina under nitrogen (Innovative Technology, Inc.). Other solvents and reagents were used without further purification. Flash column chromatography was performed using neutral silica gel (60 Å, 230 – 400 mesh, Silicycle). Thin-layer chromatography (TLC) was performed using aluminum backed silica gel plates (details), and compounds were visualized by UV irradiation at 254 nm and by staining with  $\text{KMnO}_4$  solution.

#### Instrumentation

Proton nuclear magnetic resonance ( $^1\text{H}$  NMR) spectra and carbon nuclear magnetic resonance ( $^{13}\text{C}$ ) spectra were recorded on a 500 MHz Agilent DD2 Spectrometer or a 400 MHz Bruker Spectrometer. Chemical shifts for protons are recorded in parts per million (ppm) relative to tetramethylsilane and are referenced to residual protium in the solvent ( $\text{CDCl}_3$ ;  $\delta$  7.26). Chemical shifts for carbons are recorded in parts per million (ppm) relative to tetramethylsilane and are referenced to residual carbon in the solvent ( $\text{CDCl}_3$ ;  $\delta$  77.16). Data are represented in the following order: chemical shift ( $\delta$ , ppm); multiplicity (s, singlet; d, doublet; t, triplet; q, quartet; m, multiplet; br s, broad singlet); coupling constant (J, Hz); number of protons; assignment. Proton assignments were made based on coupling constants and 2D NMR spectra. High-resolution mass spectra (HRMS) were obtained on a JEOL AccuTOF JMS- T1000LC mass spectrometer equipped with a DART (direct analysis in real time) ion source. Infrared (IR) spectra were obtained on a Perkin-Elmer Spectrum 100 instrument equipped with a singlebounce diamond/ZnSe ATR accessory as neat samples. Spectral features are tabulated as follows: wavenumber ( $\text{cm}^{-1}$ ); intensity (s-strong, m- medium, w-weak).

## 6.2 Preparation of Substrates

### General Preparation of Substrates

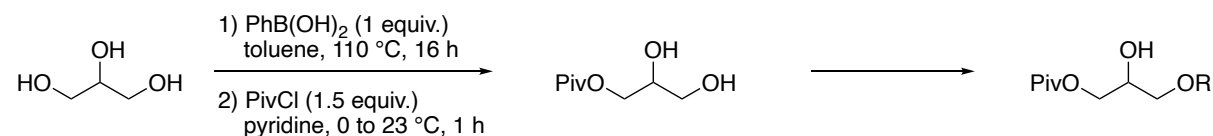

### (S1) – 1-O-(trimethylacetyl)glycerol

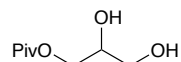

Prepared according to adapted literature procedures.<sup>11</sup>

Glycerol (1 equiv.) and phenylboronic acid (1 equiv.) in a round bottom flask equipped with a magnetic stir bar were dissolved in toluene (5 mL/mmol). The reaction flask was sealed and stirred at 110 °C for 16 hours. After 16 hours, the reaction mixture was cooled to room temperature then solvent was removed under reduced pressure, azeotroped three times with toluene, followed by drying under high vacuum to dryness. Boronic ester intermediate was dissolved in pyridine (2 mL/mmol) and cooled to 0 °C. Trimethylacetyl chloride (1.2 equiv.) was added and the reaction was warmed to room temperature and stirred for 1 hour. Reaction was diluted with toluene and filtered through Celite, then concentrated under reduced pressure. Crude reaction residue was dissolved in ethyl acetate (40 mL/mmol), poured into a separatory funnel containing 1M sorbitol:1M  $\text{Na}_2\text{CO}_3$  (40 mL/mmol) and shaken for 5 minutes. Aqueous layer was extracted with ethyl acetate (3 x 40 mL/mmol), combined organic layers dried over  $\text{MgSO}_4$ , filtered, and concentrated under reduced pressure. Crude residue was purified by flash column chromatography on silica (75% ethyl acetate in hexanes) to yield (S1) as a clear, colourless oil (77%).

Spectral data were in agreement with those previously reported.<sup>12</sup>

$^1\text{H NMR}$  (400 MHz,  $\text{CDCl}_3$ ):  $\delta$  (ppm) = 4.14 (dt,  $J$  = 5.4, 0.9 Hz, 2H), 3.94–3.87 (m, 1H), 3.72 – 3.63 (m, 1H), 3.61–3.53 (m, 1H), 1.20 (s, 9H).

## General Procedure A

Adapted according to literature procedures.<sup>13</sup>

To a solution of 1-O-(trimethylacetyl)glycerol (1 equiv.) and 2-aminoethyl diphenylborinate (10 mol%) in acetonitrile (5 mL/mmol) was added the acid chloride (1.2 equiv.) followed by DIPEA (1.2 equiv.). The reaction was stirred at room temperature for 4 hours (or until reaction was indicated complete by TLC) then dilute with ethyl acetate. Reaction mixture was extracted with water, then aqueous layer was extracted twice more with ethyl acetate. Combined organic layers were washed with brine, dried over MgSO<sub>4</sub>, filtered, and concentrated under reduced pressure. Crude residue was purified by flash column chromatography on silica.

### (1a) – 1-O-acetyl-3-O-pivaloylglycerol

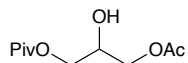

Prepared according to General Procedure A with acetyl chloride to yield (**1a**) as a clear oil (89%). Purified by flash column chromatography on silica (20% to 30% ethyl acetate in hexanes).

Spectral data were in agreement with those previously reported.<sup>14</sup>

**R<sub>f</sub>** = 0.36 (30% ethyl acetate in hexanes)

**<sup>1</sup>H NMR (500 MHz, CDCl<sub>3</sub>):** δ (ppm) = 4.26–4.06 (m, 5H), 2.10 (s, 3H), 1.22 (s, 9H).

### (1b) – 1-O-benzoyl-3-O-pivaloylglycerol

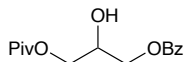

Prepared according to General Procedure A with benzoyl chloride to yield (**1b**) as a light yellow oil (59%). Purified by flash column chromatography on silica (20% to 30% ethyl acetate in hexanes).

$R_f = 0.30$  (30% ethyl acetate in hexanes)

$^1\text{H NMR}$  (500 MHz,  $\text{CDCl}_3$ ):  $\delta$  (ppm) = 8.06–8.02 (m, 2H, Ar-H), 7.59–7.53 (m, 1H, Ar-H), 7.46–7.44 (m, 2H, Ar-H), 4.46 – 4.36 (m, 2H, H-1), 4.28 – 4.21 (m, 3H, H-2, H-3), 1.22 (s, 9H,  $-\text{C}(\text{CH}_3)_3$ ).

$^{13}\text{C NMR}$  (126 MHz  $\text{CDCl}_3$ ):  $\delta$  (ppm) = 178.8, 166.7, 133.4, 129.8, 129.7, 128.6, 68.6, 65.8, 65.3, 39.0, 27.3.

$\text{IR}$  (neat,  $\text{cm}^{-1}$ ): 3472 (w), 2968 (w), 1716 (s), 1602 (w), 1481 (m), 1453 (m), 1268 (s), 1156 (s), 1109 (s), 1070 (s), 1027 (m), 710 (s).

$\text{HRMS}$  (DART $^+$ ,  $m/z$ ): calculated for  $\text{C}_{15}\text{H}_{21}\text{O}_5$   $[\text{M}+\text{H}]^+$ : 281.13835; found: 281. 13928.

### (1c) – 1-*O*-chloroacetyl-3-*O*-pivaloylglycerol

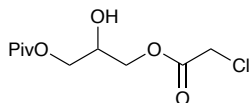

Prepared according to General Procedure A with chloroacetyl chloride to yield (**1c**) as a clear oil (69%). Purified by flash column chromatography on silica (20% to 30% ethyl acetate in hexanes).

$R_f = 0.35$  (30% ethyl acetate in hexanes)

$^1\text{H NMR}$  (500 MHz,  $\text{CDCl}_3$ ):  $\delta$  (ppm) = 4.31 – 4.09 (m, 7H),

$^{13}\text{C NMR}$  (126 MHz  $\text{CDCl}_3$ ):  $\delta$  (ppm) = 178.9, 167.4, 68.3, 66.7, 65.0, 40.8, 39.0, 27.2.

**IR (neat, cm<sup>-1</sup>):** 3461 (w), 2969 (w), 1727 (s), 1482 (m), 1396 (m), 1284 (m), 1152 (s), 1038 (m), 940 (w), 781 (m).

**HRMS (DART<sup>+</sup>, m/z):** calculated for C<sub>10</sub>H<sub>18</sub>O<sub>5</sub>Cl [M+H]<sup>+</sup>: 253.08373; found: 253.08424.

**(1d) – 1-*O*-trichloroacetyl-3-*O*-pivaloylglycerol**

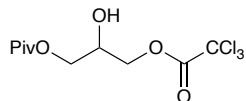

Prepared according to General Procedure A with trichloroacetyl chloride to yield **(1d)** as a colourless oil (48%).

Purified by flash column chromatography on silica (20% to 30% ethyl acetate in hexanes). Material was isolated as a 3:1 mixture of (#) and 2-trichloroacetoxy-1-pivaloyloxypropan-3-ol due to trichloroacetoxy migration.

**R<sub>f</sub>** = 0.45 (30% ethyl acetate in hexanes)

**<sup>1</sup>H NMR (500 MHz, CDCl<sub>3</sub>):** δ (ppm) = 4.47–4.37 (m, 2H, H-1), 4.25–4.19 (m, 3H, H2, H3), 1.22 (s, 9H, -C(CH<sub>3</sub>)<sub>3</sub>).

**<sup>13</sup>C NMR (126 MHz CDCl<sub>3</sub>):** δ (ppm) = 178.9, 162.0, 77.7, 69.2, 68.0, 64.8, 39.1, 27.3.

**IR (neat, cm<sup>-1</sup>):** 3459 (w), 2972 (w), 1768 (s), 1719 (m), 1481 (m), 1368 (w), 1236 (s), 1155 (s), 1003 (m), 826 (s), 679 (s).

**HRMS (DART<sup>+</sup>, m/z):** calculated for C<sub>10</sub>H<sub>16</sub>O<sub>5</sub>Cl<sub>3</sub> [M+H]<sup>+</sup>: 321.00578; found: 321.00636.

**NMR peaks for the acyl migrated product: 2-trichloroacetoxy-1-pivaloyloxypropan-3-ol:**

**<sup>1</sup>H NMR (500 MHz, CDCl<sub>3</sub>):** δ (ppm) = 5.28 – 5.24 (m, 1H), 4.55 – 4.53 (m, 1H), 4.31 (dd, *J* = 12.4, 6.5 Hz, 1H), 3.86 (d, *J* = 5.2 Hz, 2H), 3.81 – 3.77 (m, 1H), 1.20 (s, 9H).

**<sup>13</sup>C NMR (126 MHz CDCl<sub>3</sub>):** δ (ppm) = 178.5, 161.6, 66.7, 61.8, 60.9, 40.1, 39.0, 27.2.

**(1e) – 1-O-tosyl-3-O-pivaloylglycerol**

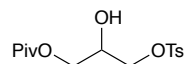

Prepared according to General Procedure A with tosyl chloride (1.5 equiv.) and DIPEA (1.5 equiv.) to yield **(1e)** as a white solid (34%). Purified by flash column chromatography on silica (20% to 30% ethyl acetate in hexanes).

**R<sub>f</sub>** = 0.15 (30% ethyl acetate in hexanes)

**<sup>1</sup>H NMR (500 MHz, CDCl<sub>3</sub>):** δ (ppm) = 7.82–7.78 (m, 2H, Ar-H), 7.38–7.34 (m, 2H, Ar-H), 4.13 (dd, *J* = 4.8, 1.7 Hz, 2H, H-1), 4.11–4.01 (m, 3H, H-2, H-3), 2.53 (d, *J* = 4.5 Hz, 1H, -OH), 2.45 (s, 3H, -CH<sub>3</sub>), 1.17 (s, 9H, -C(CH<sub>3</sub>)<sub>3</sub>).

**<sup>13</sup>C NMR (126 MHz CDCl<sub>3</sub>):** δ (ppm) = 178.8, 145.4, 132.6, 130.1, 128.2, 70.2, 68.2, 64.5, 39.0, 27.2, 21.8.

**IR (neat, cm<sup>-1</sup>):** 3497 (w), 2976 (w), 1717 (s), 1596 (m), 1458 (m), 1354 (s), 1290 (m), 1175 (s), 1162 (s), 1096 (m), 983 (s), 928 (s), 833 (s), 812 (s), 664 (s).

**HRMS (DART<sup>+</sup>, m/z):** calculated for C<sub>15</sub>H<sub>23</sub>O<sub>6</sub>S [M+H]<sup>+</sup>: 331.12194; found: 331.12099.

### 6.3 Intramolecular Competition Experiments

#### General Procedure B

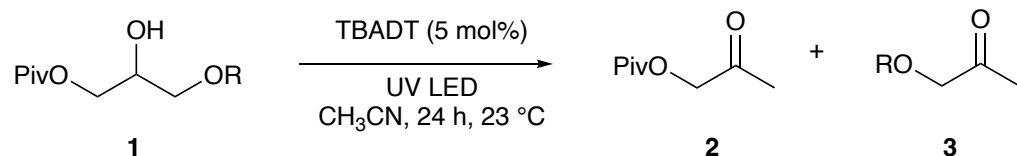

Substrate (**1**) (1 equiv.), tetrabutylammonium decatungstate (5 mol%) and a small magnetic stir bar were added to a 1 dram vial. A rubber septum was used to seal the vial, which was then evacuated and backfilled with argon three times on a Schlenk line. Dry, degassed acetonitrile (0.125 M) was added to the vial under a balloon of argon. The rubber septum was removed and quickly replaced with the vial cap which was sealed with Teflon tape and parafilm. The vial was placed 5 inches from a UV LED Kessil lamp and stirred at 1050 rpm for 24 hours at 25 °C. After 24 hours the crude reaction was concentrated under reduced pressure and analyzed by <sup>1</sup>H NMR spectroscopy.

### Competition experiment with 1-*O*-acetyl-3-*O*-pivaloylglycerol (**1a**)

1-*O*-acetyl-3-*O*-pivaloylglycerol (**1a**) was subjected to General Procedure B. <sup>1</sup>H NMR spectra analysis of the crude reaction mixture reveals the formation of products (**2**) and (**3a**) in a 1.1:1 ratio. <sup>1</sup>H NMR spectra for (**2**)<sup>15</sup> and (**3a**)<sup>16</sup> are consistent with literature reports.

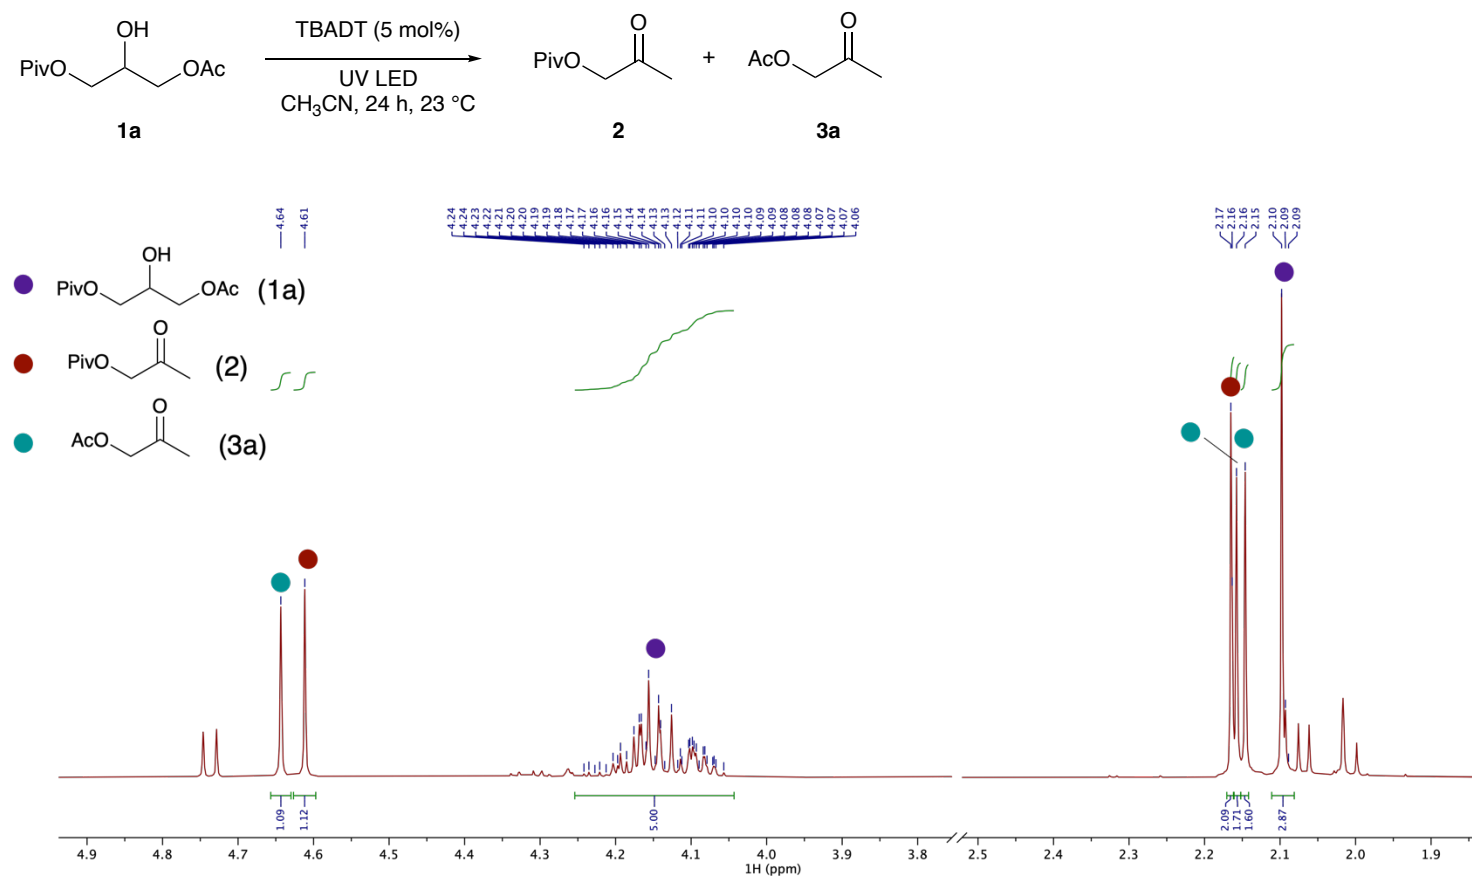

**Figure S06.** <sup>1</sup>H NMR spectra (prior to purification) of intramolecular competition experiment of 1-*O*-acetyl-3-*O*-pivaloylglycerol (**1a**) to form products (**2**) and (**3a**).



### Competition experiment with 1-*O*-benzyloxy-3-*O*-pivaloylglycerol (**1b**)

1-*O*-benzoyl-3-*O*-pivaloylglycerol (**1b**) was subjected to General Procedure B. <sup>1</sup>H NMR spectra analysis of the crude reaction mixture reveals the formation of products (**2**) and (**3b**) in a 1.7:1 ratio. <sup>1</sup>H NMR spectra for (**2**)<sup>15</sup> and (**3b**)<sup>17</sup> are consistent with literature reports.

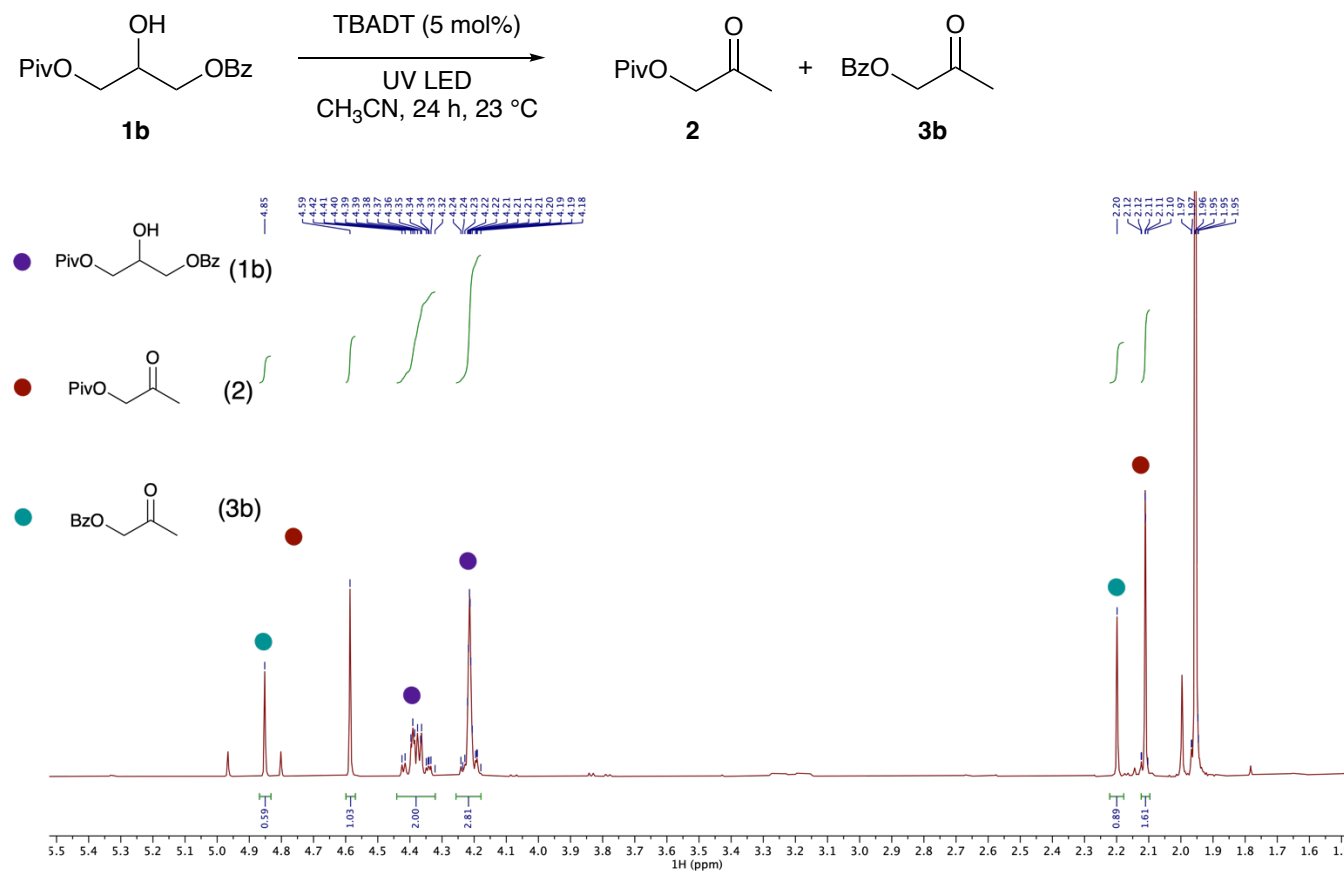

**Figure S07.** <sup>1</sup>H NMR spectra (prior to purification) of intramolecular competition experiment of 1-*O*-benzoyl-3-*O*-pivaloylglycerol (**1b**) to form products (**2**) and (**3b**).

### Competition experiment with 1-*O*-chloroacetyl-3-*O*-pivaloylglycerol (**1c**)

1-*O*-chloroacetyl-3-*O*-pivaloylglycerol (**1c**) was subjected to General Procedure B. <sup>1</sup>H NMR spectra analysis of the crude reaction mixture reveals the formation of products (**2**) and (**3c**) in a 5.4:1 ratio. <sup>1</sup>H NMR spectra for (**2**)<sup>15</sup> is consistent with literature reports.

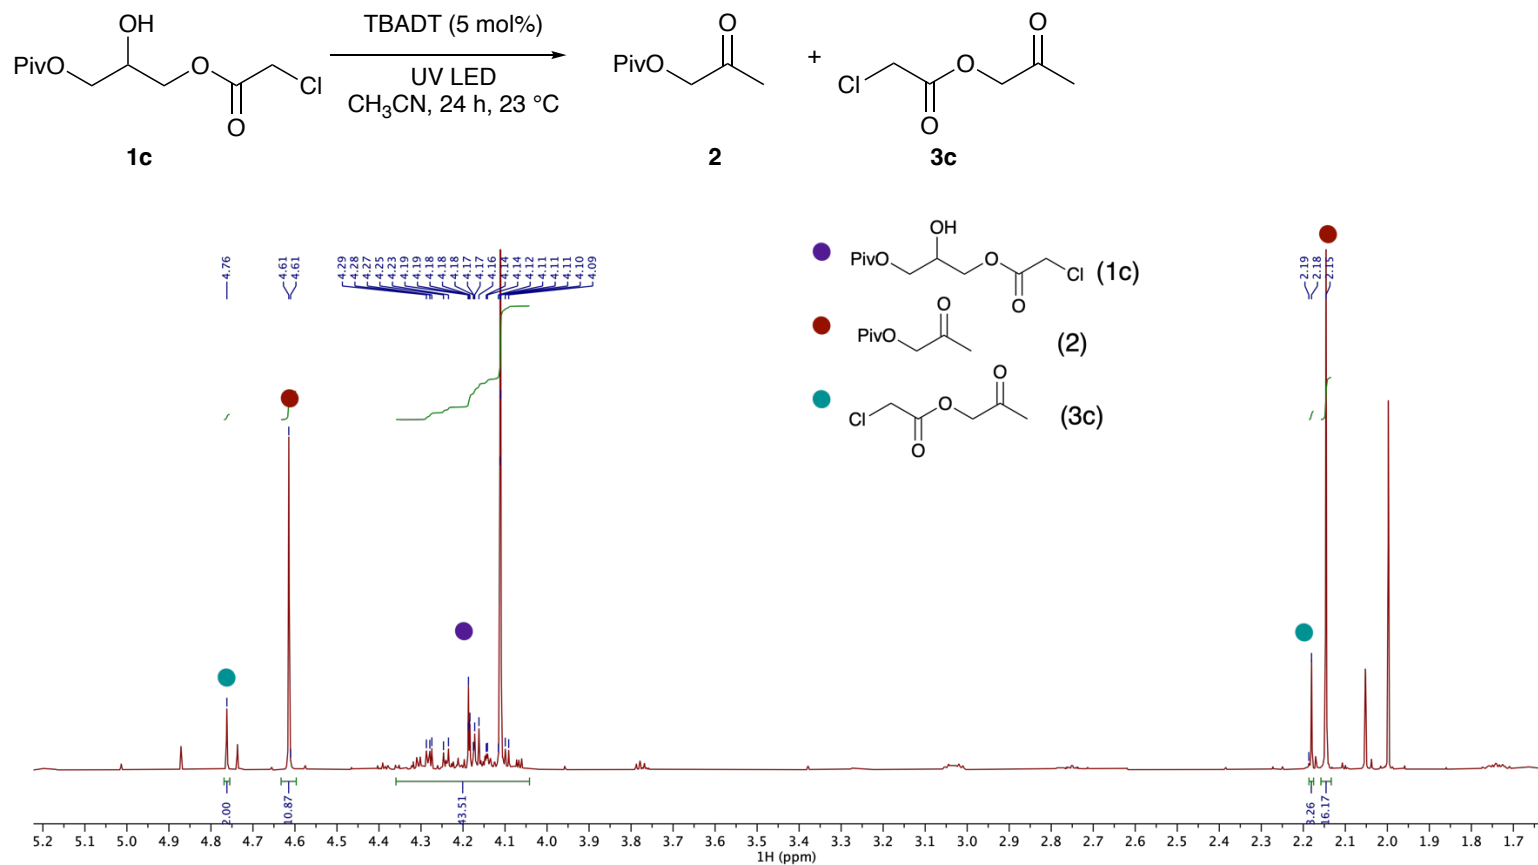

**Figure S08.** <sup>1</sup>H NMR spectra (prior to purification) of intramolecular competition experiment of 1-*O*-chloroacetyl-3-*O*-pivaloylglycerol (**1c**) to form products (**2**) and (**3c**).

### Competition experiment with 1-*O*-trichloroacetyl-3-*O*-pivaloylglycerol (**1d**)

1-*O*-trichloroacetyl-3-*O*-pivaloylglycerol (**1d**) was subjected to General Procedure B. <sup>1</sup>H NMR spectra analysis of the crude reaction mixture reveals the formation of product (**2**). Product (**3d**) was not observed. <sup>1</sup>H NMR spectra for (**2**)<sup>15</sup> is consistent with literature reports.

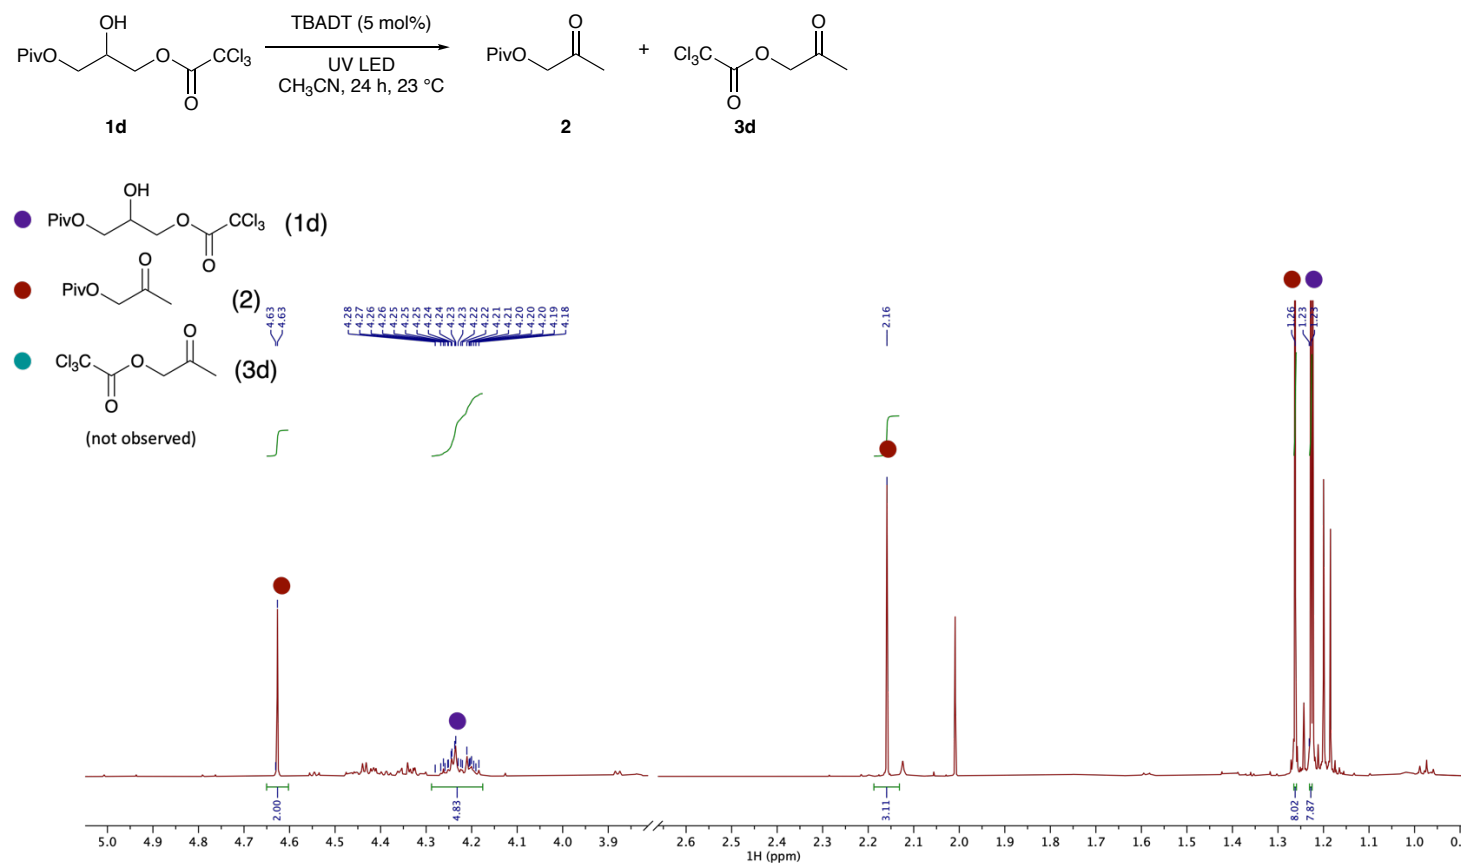

**Figure S09.** <sup>1</sup>H NMR spectra (prior to purification) of intramolecular competition experiment of 1-*O*-trichloroacetyl-3-*O*-pivaloylglycerol (**1d**) to form products (**2**) and (**3d**).

### Competition experiment with 1-*O*-tosyl-3-*O*-pivaloylglycerol (**1e**)

1-*O*-tosyl-3-*O*-pivaloylglycerol (**1e**) was subjected to General Procedure B. <sup>1</sup>H NMR spectra analysis of the crude reaction mixture reveals the formation of product (**2**). Product (**3e**) was not observed. <sup>1</sup>H NMR spectra for (**2**)<sup>15</sup> and (**3e**)<sup>18</sup> (not observed) are consistent with literature reports.

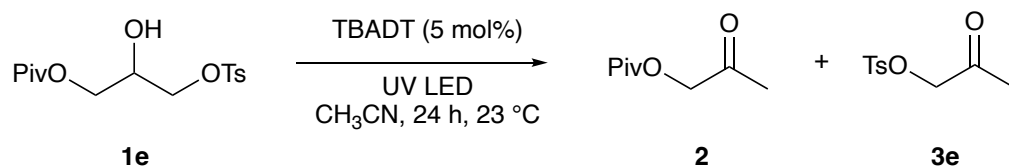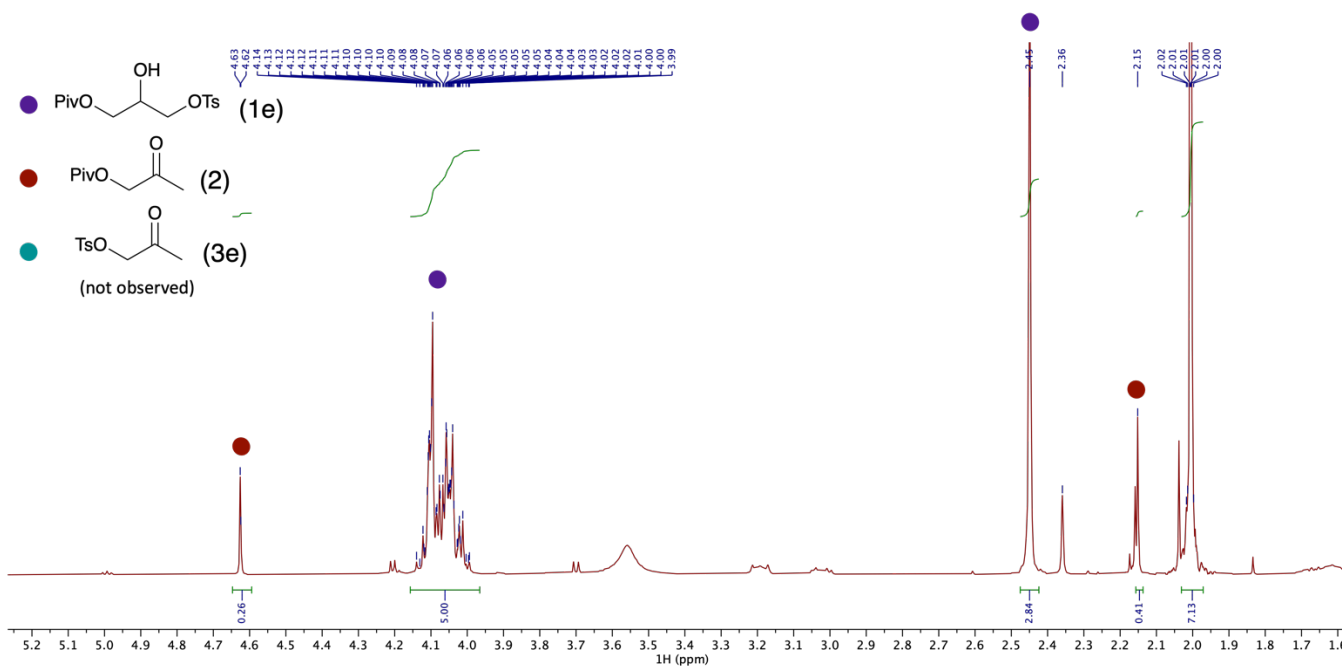

**Figure S10.** <sup>1</sup>H NMR spectra (prior to purification) of intramolecular competition experiment of 1-*O*-tosyl-3-*O*-pivaloylglycerol (**1e**) to form products (**2**) and (**3e**).

# 6.4 NMR Spectra (1b) – 1-O-benzoyl-3-O-pivaloylglycerol

<sup>1</sup>H NMR (500 MHz, CDCl<sub>3</sub>)

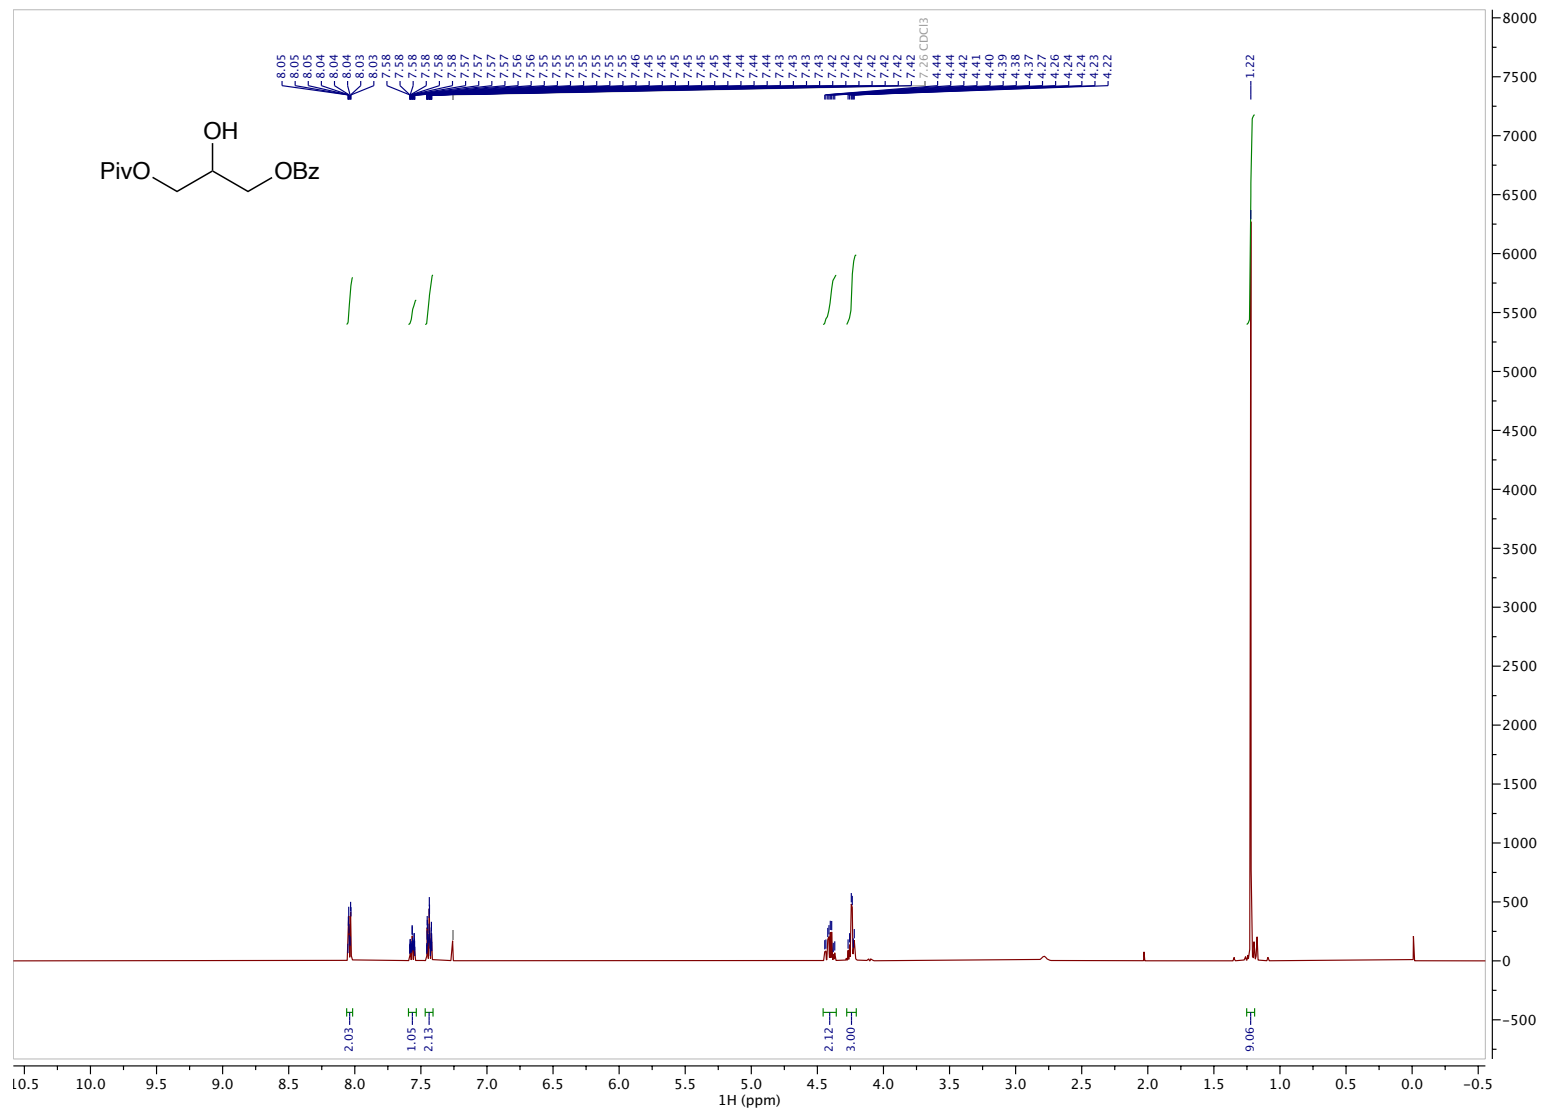

**(1b) – 1-*O*-benzoyl-3-*O*-pivaloylglycerol**

$^{13}\text{C}$  NMR (126 MHz,  $\text{CDCl}_3$ )

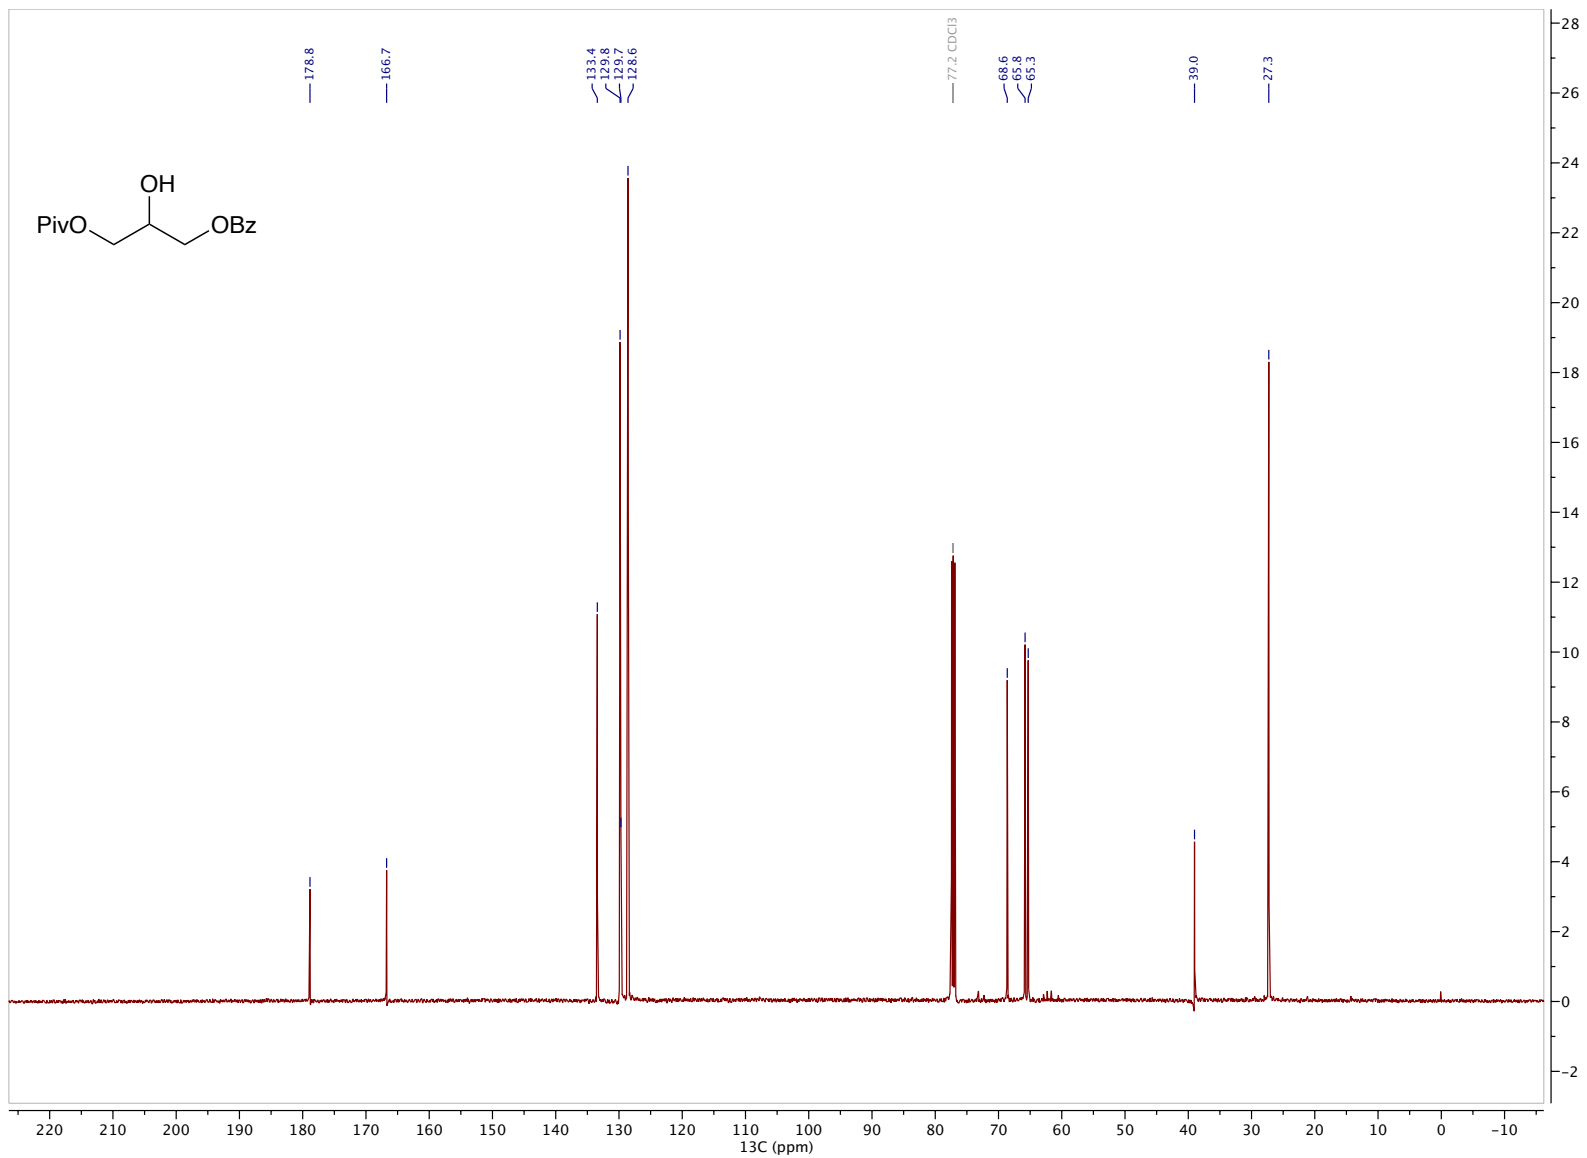

**(1b) – 1-*O*-benzoyl-3-*O*-pivaloylglycerol**  
COSY NMR (500 MHz, CDCl<sub>3</sub>)

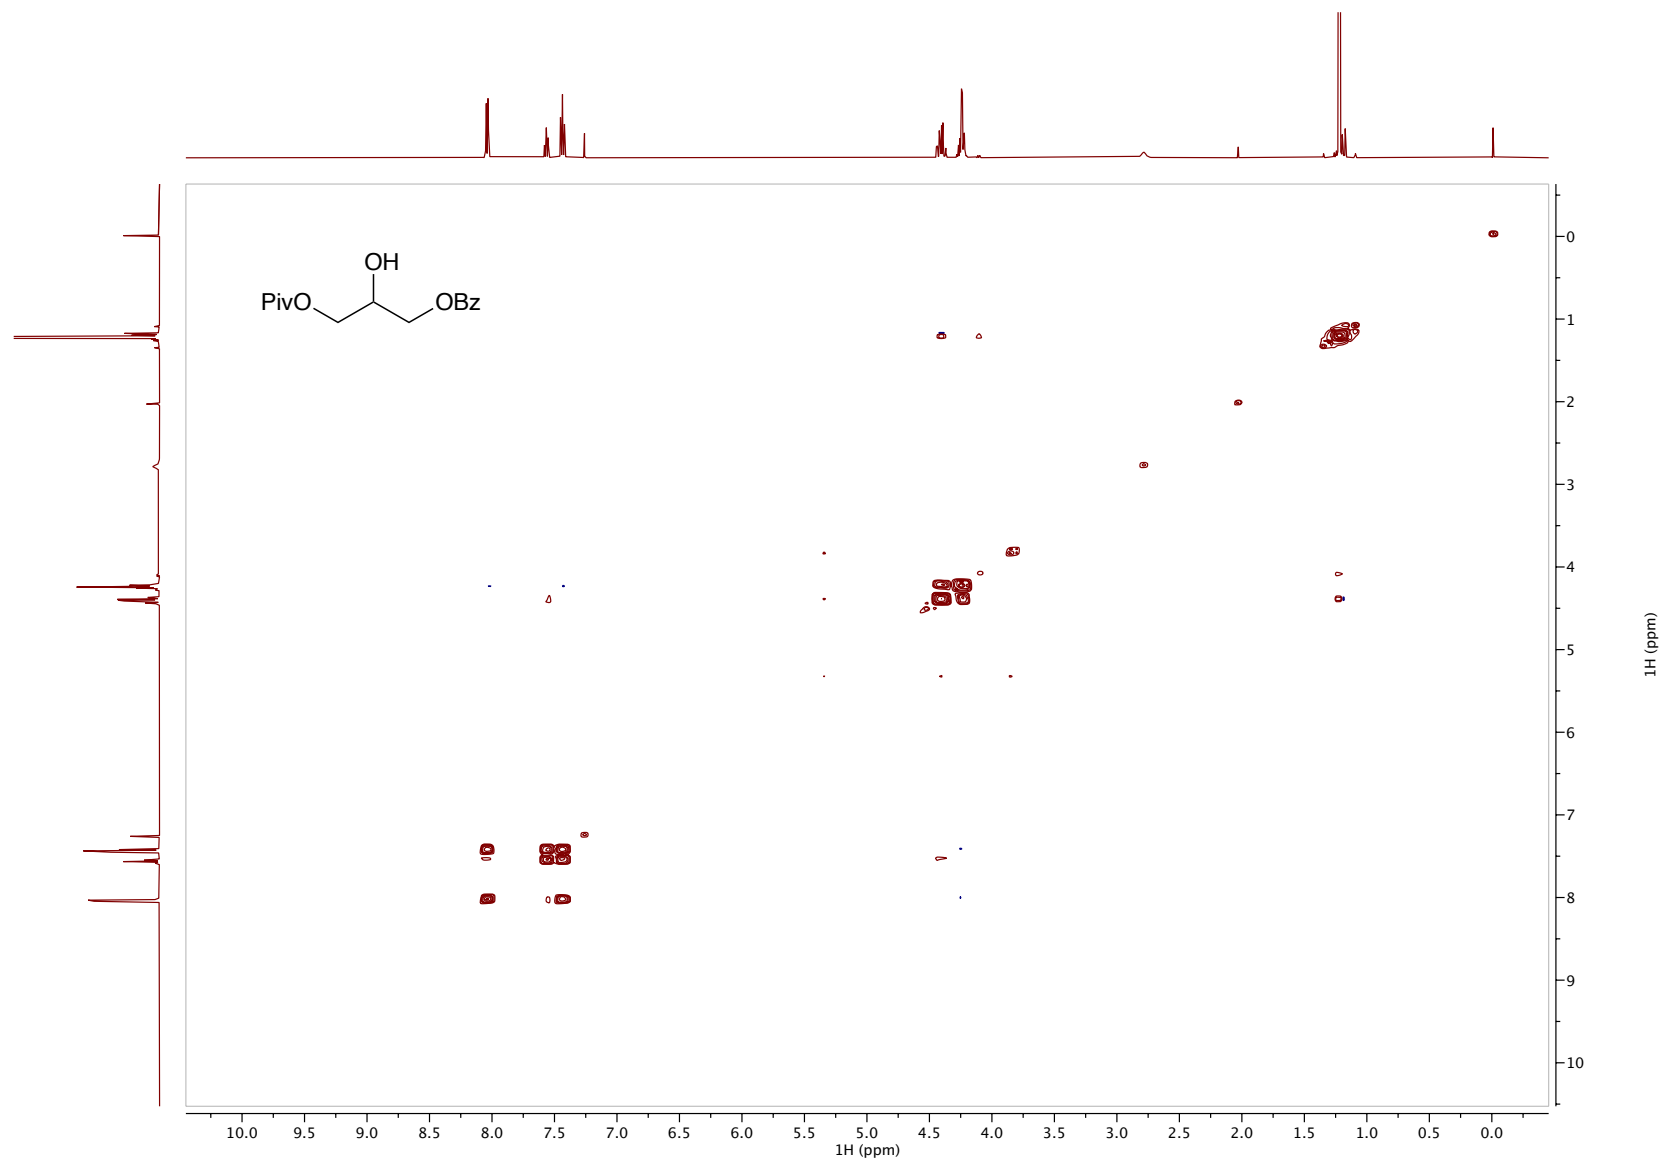

**(1c) – 1-*O*-chloroacetyl-3-*O*-pivaloylglycerol**

<sup>1</sup>H NMR (500 MHz, CDCl<sub>3</sub>)

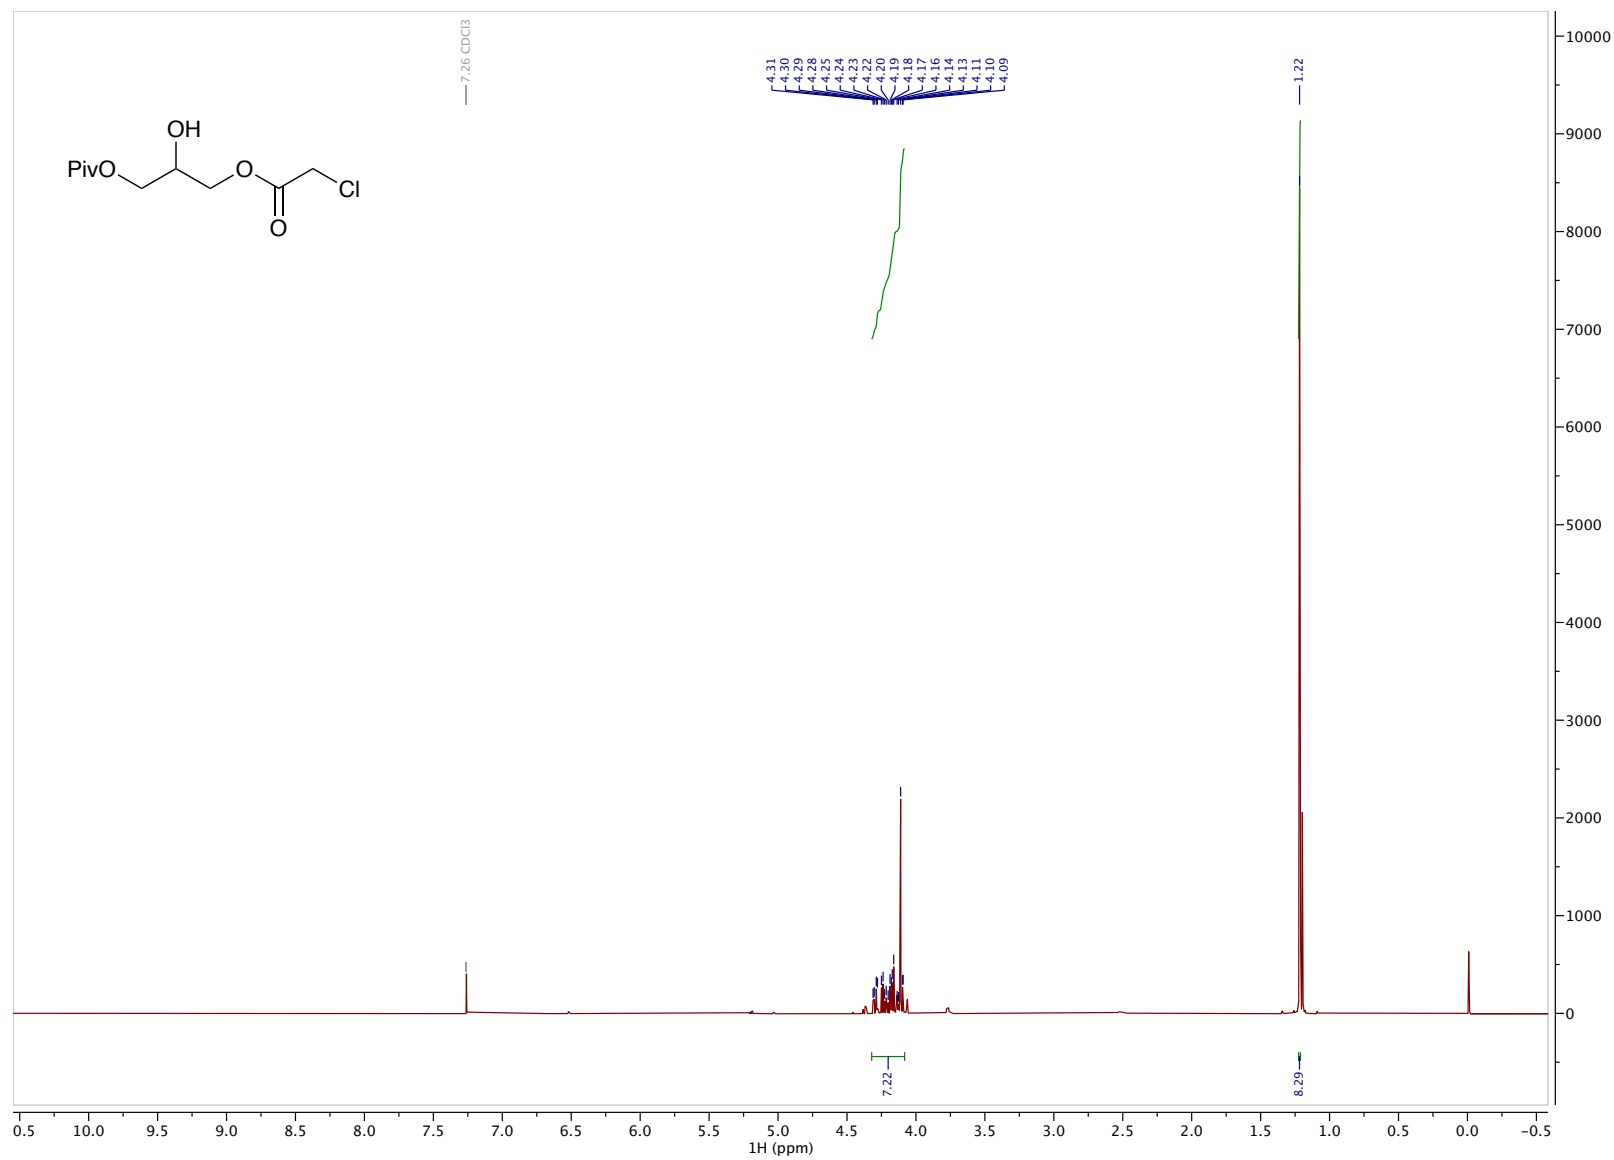



**(1c) – 1-*O*-chloroacetyl-3-*O*-pivaloylglycerol**  
<sup>13</sup>C NMR (126 MHz, CDCl<sub>3</sub>)

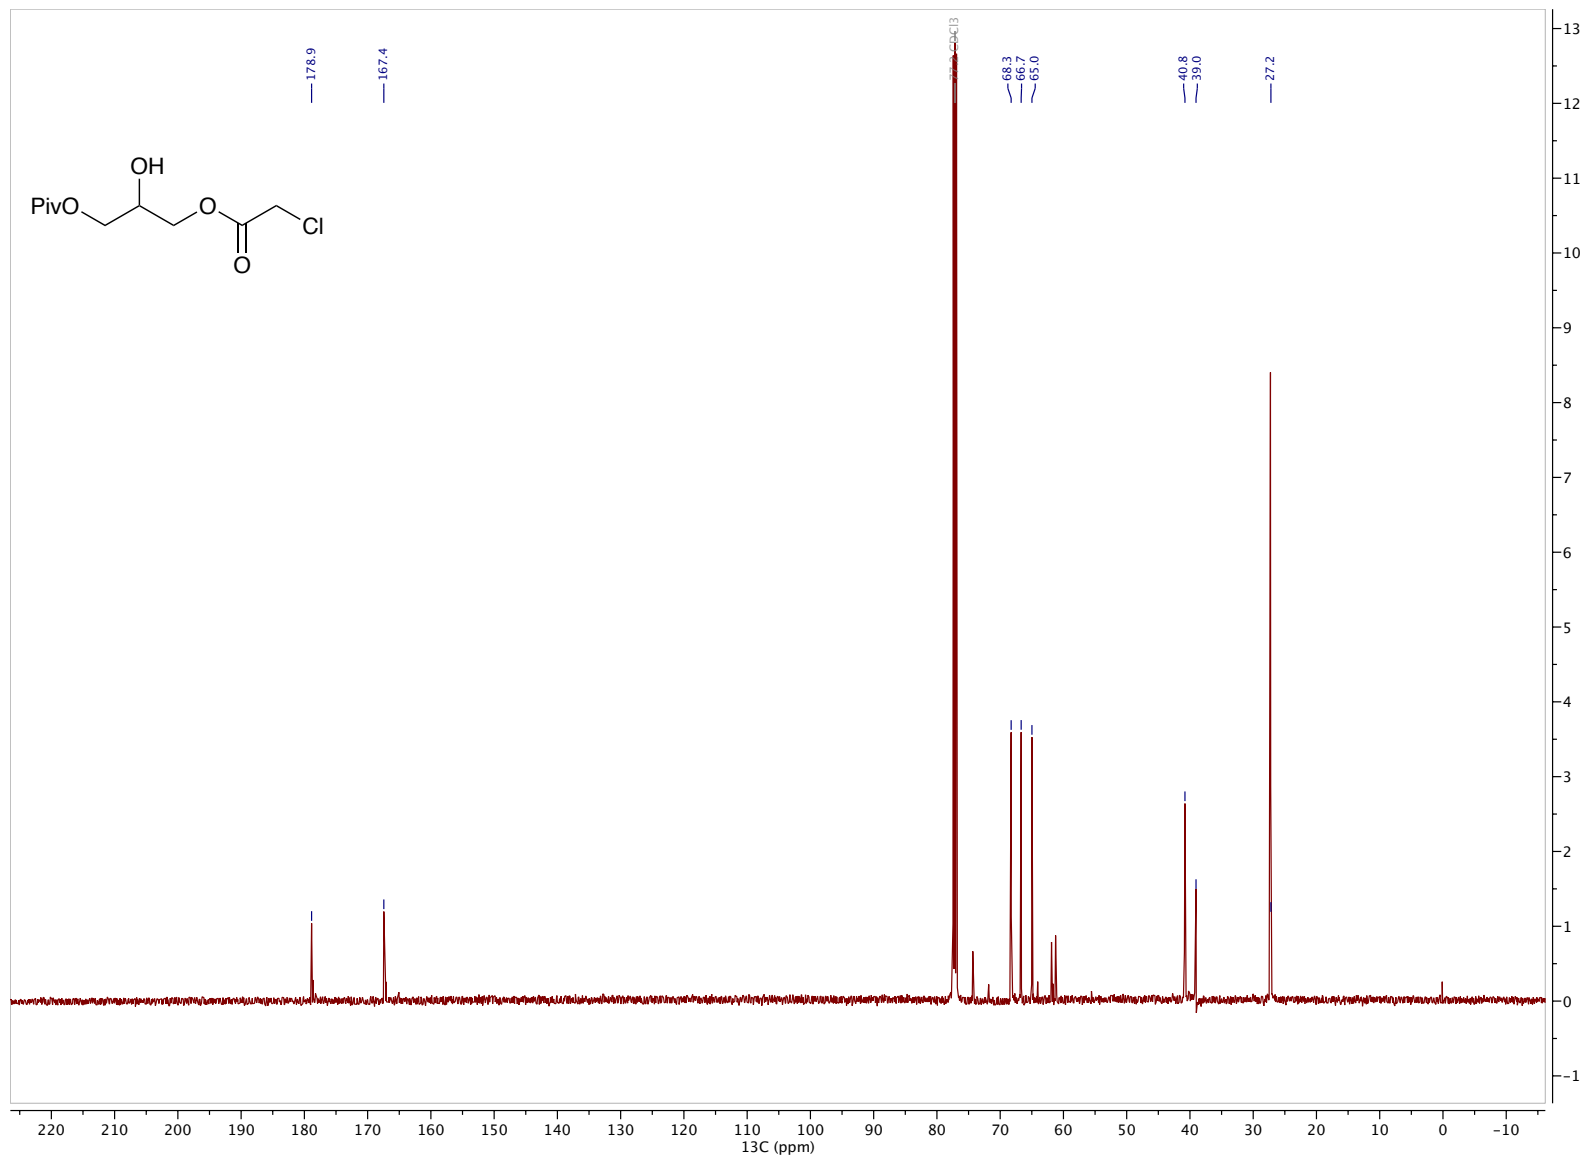

**(1c) – 1-*O*-chloroacetyl-3-*O*-pivaloylglycerol**  
COSY NMR (500 MHz, CDCl<sub>3</sub>)

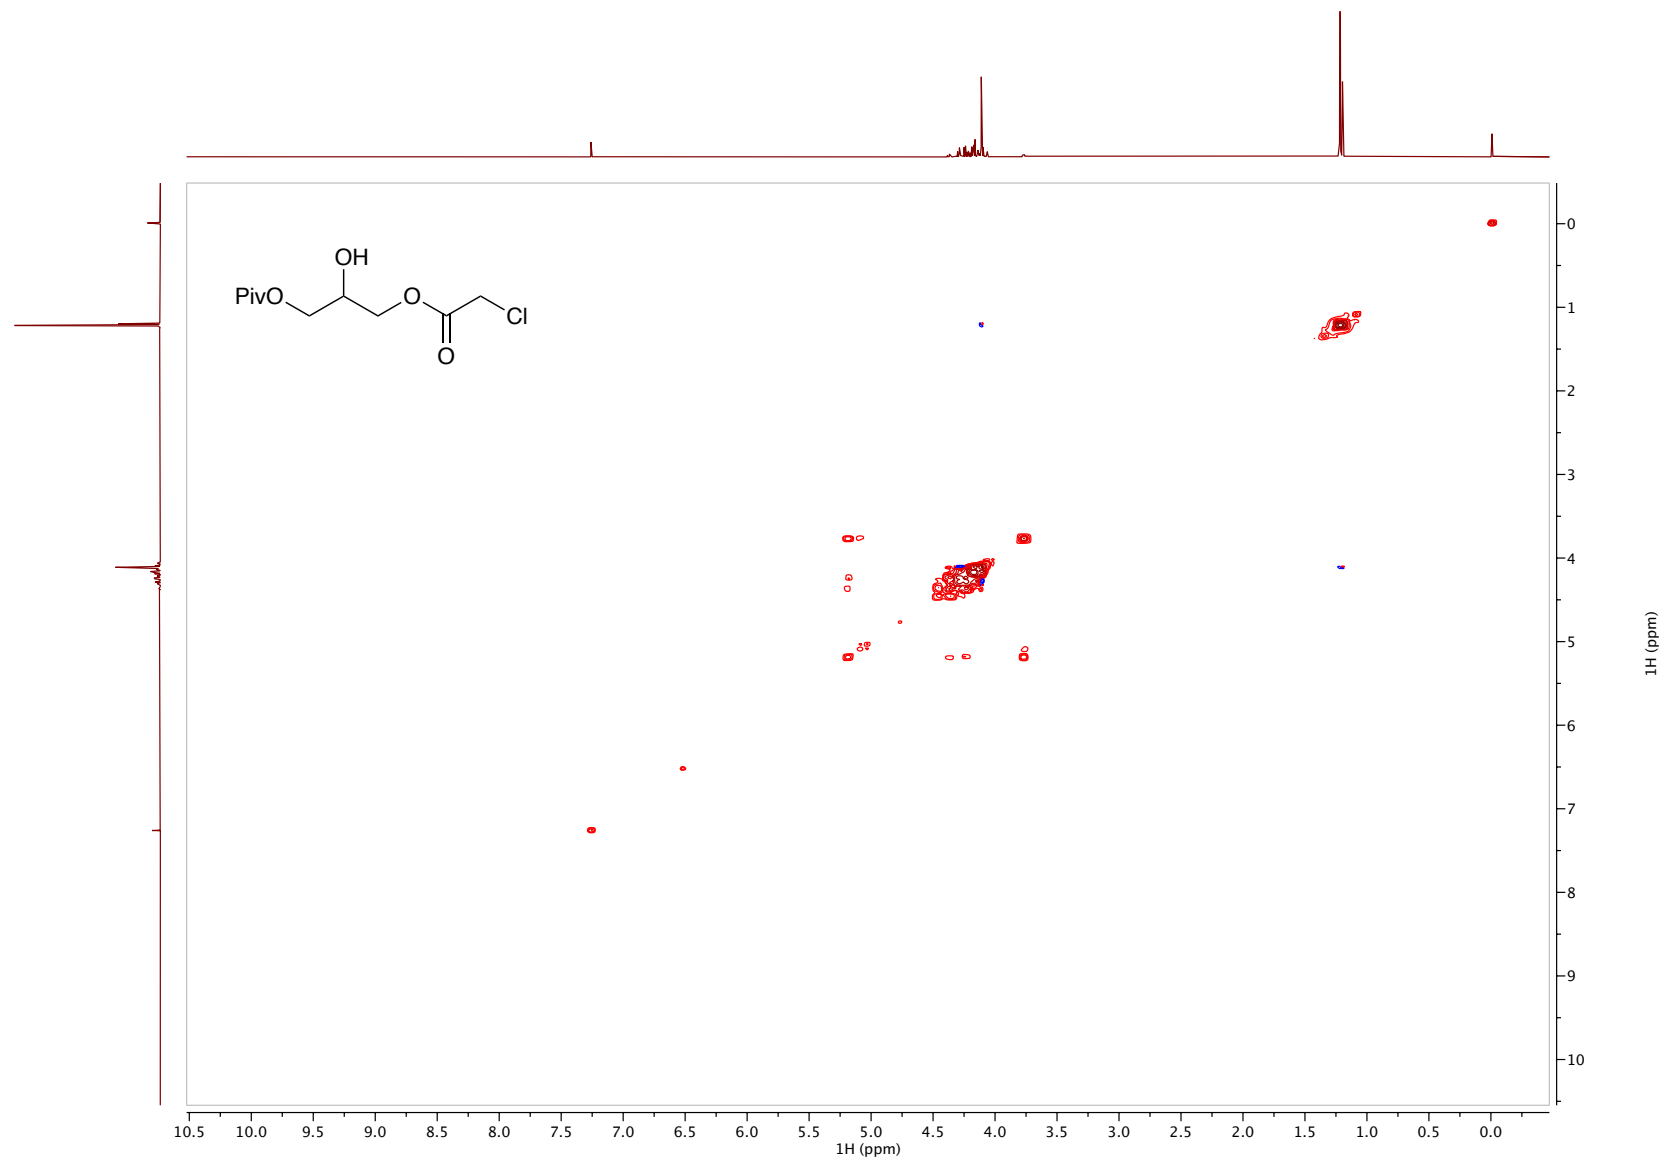

**(1d) – 1-O-trichloroacetyl-3-O-pivaloylglycerol**

<sup>1</sup>H NMR (500 MHz, CDCl<sub>3</sub>)

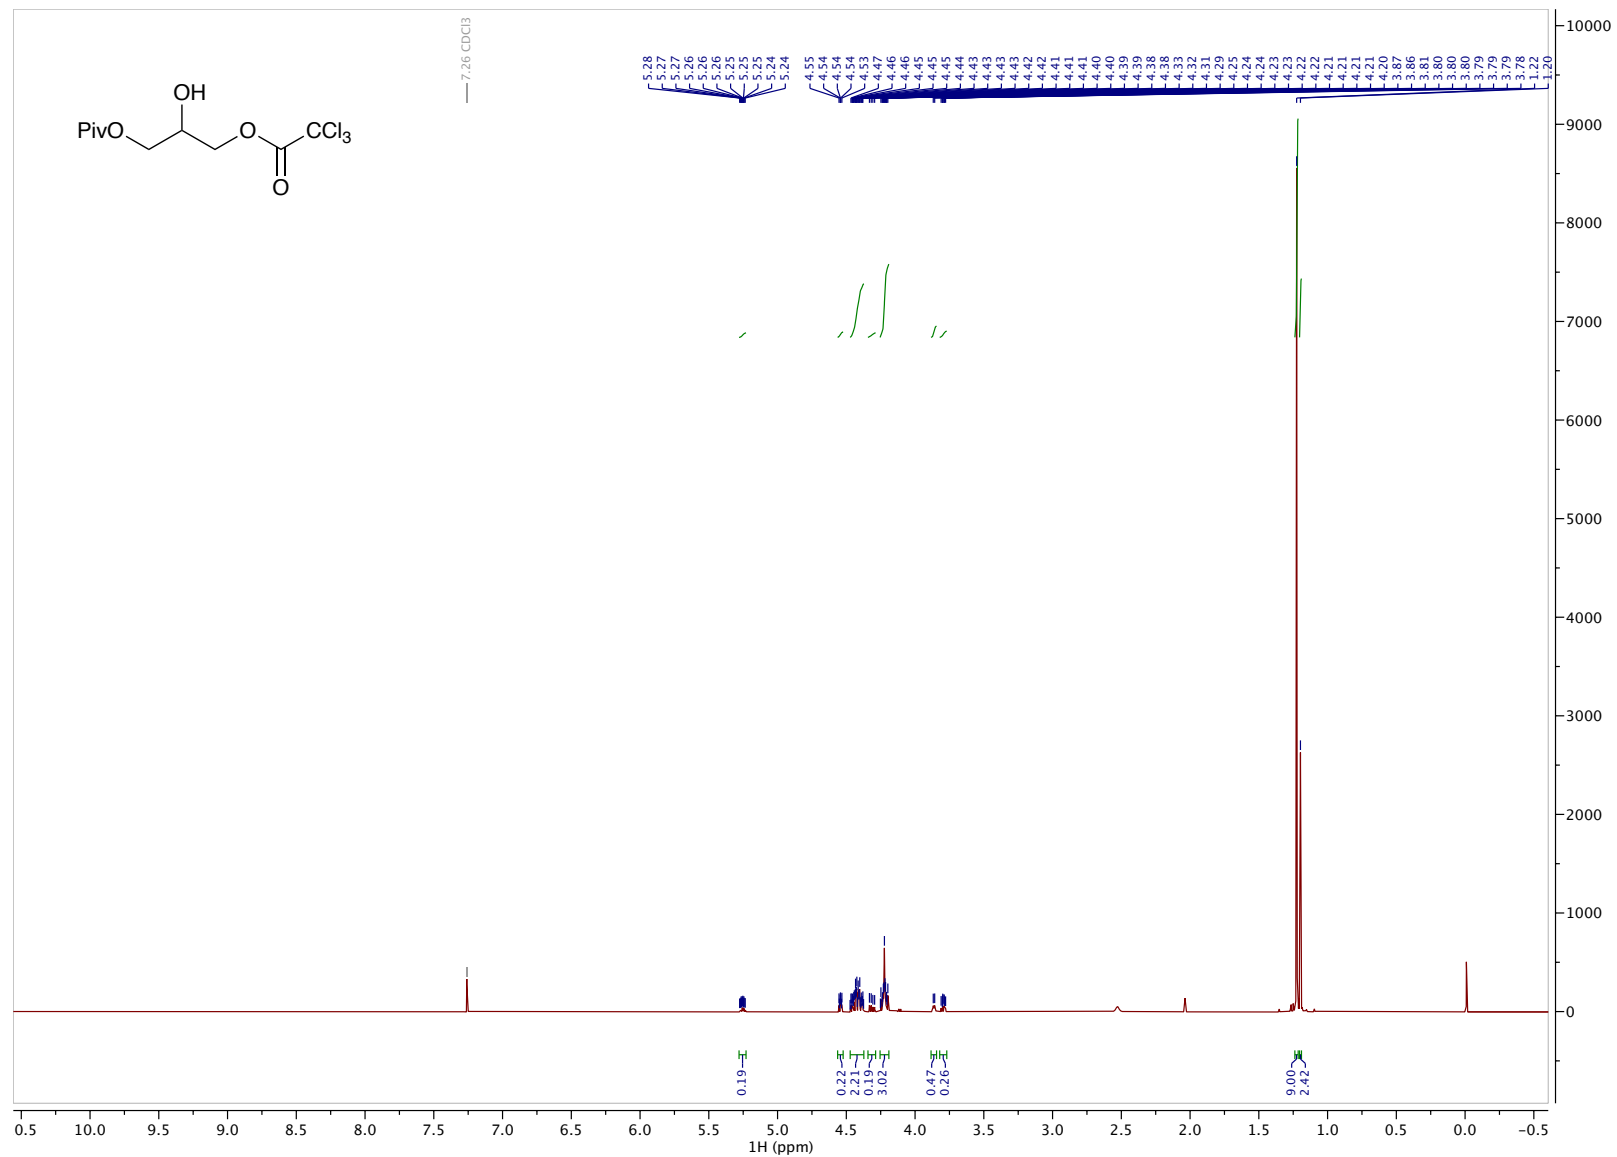

**(1d) – 1-*O*-trichloroacetyl-3-*O*-pivaloylglycerol**

<sup>13</sup>C NMR (126 MHz, CDCl<sub>3</sub>)

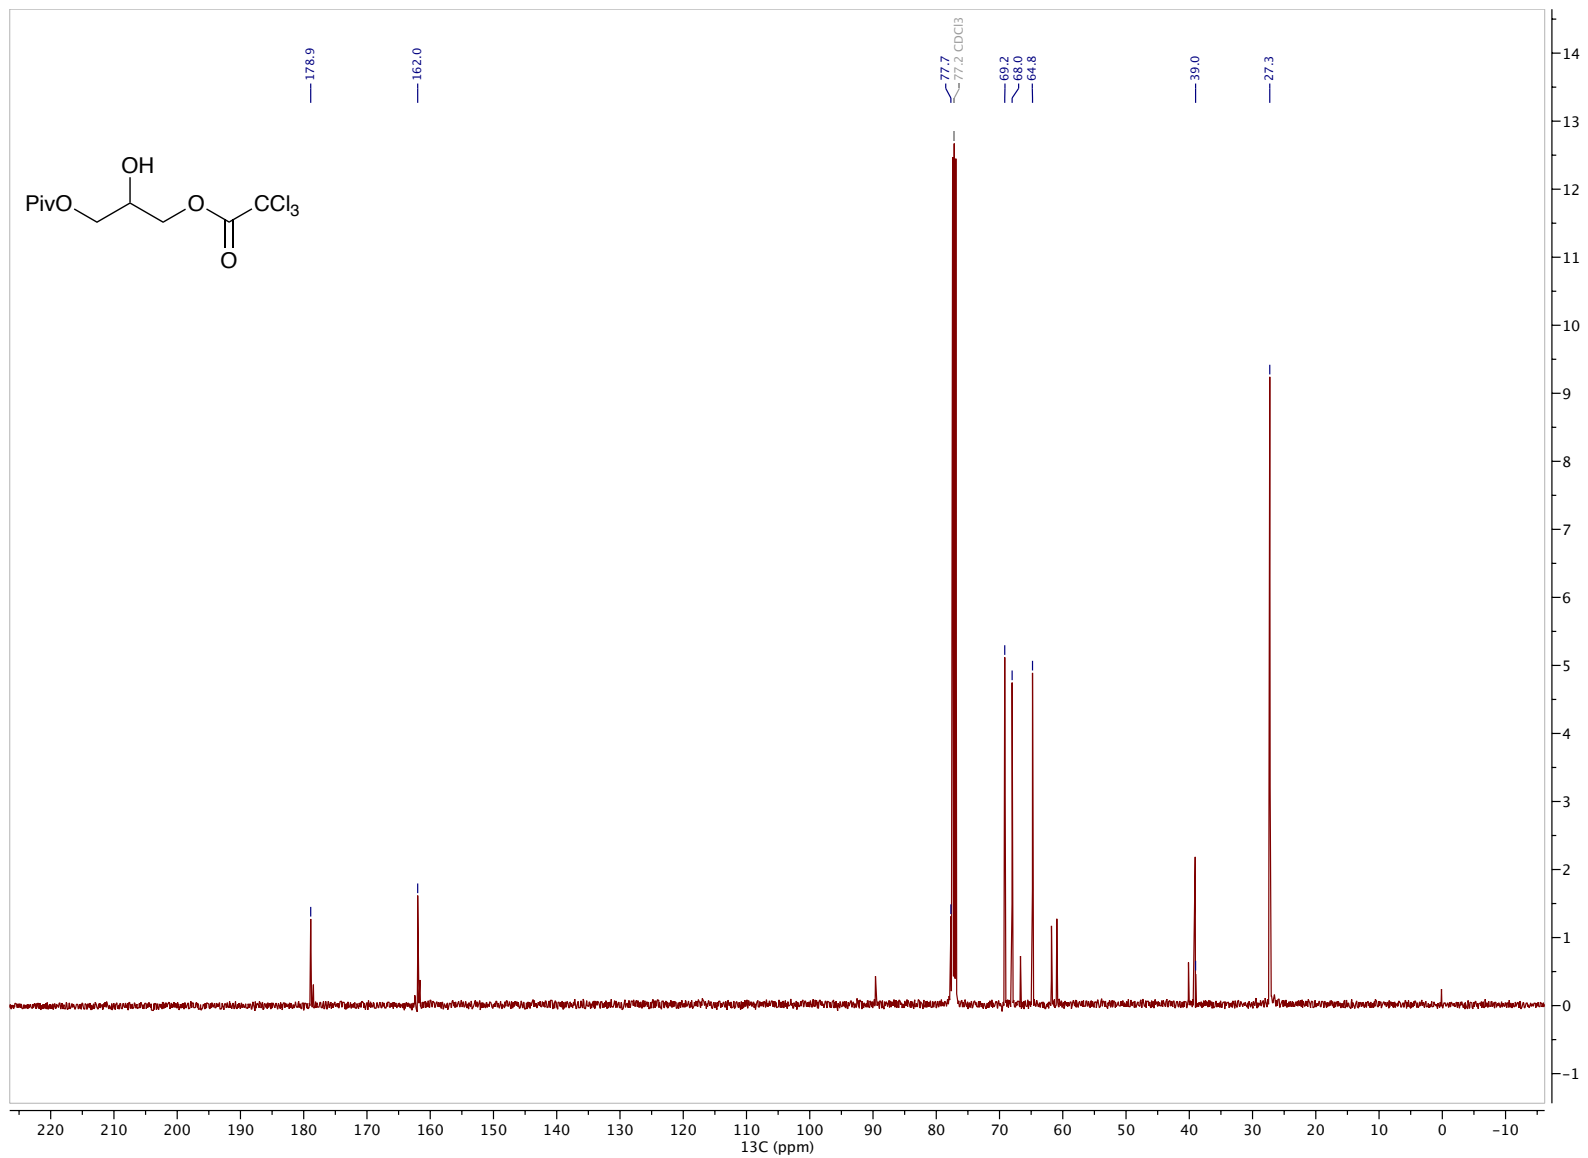

**(1d) – 1-*O*-trichloroacetyl-3-*O*-pivaloylglycerol**  
COSY NMR (500 MHz, CDCl<sub>3</sub>)

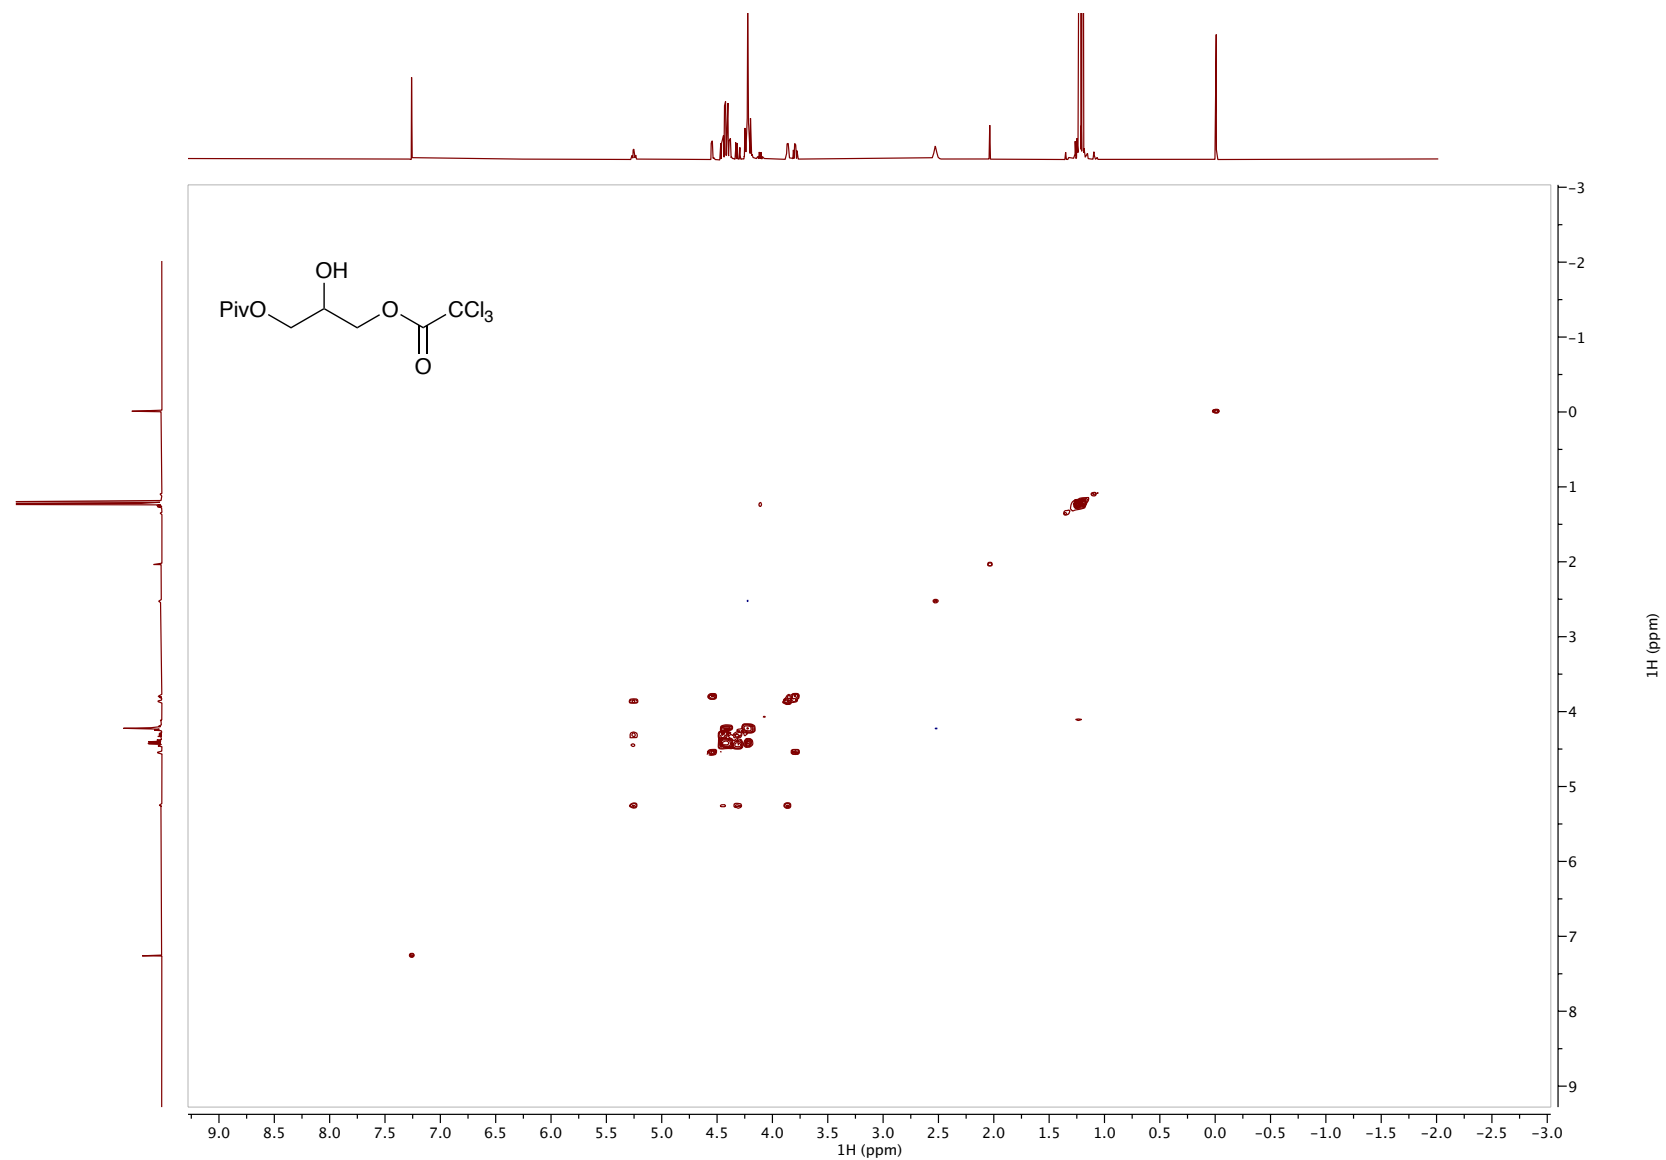

**(1e) – 1-*O*-tosyl-3-*O*-pivaloylglycerol**  
<sup>1</sup>H NMR (500 MHz, CDCl<sub>3</sub>)

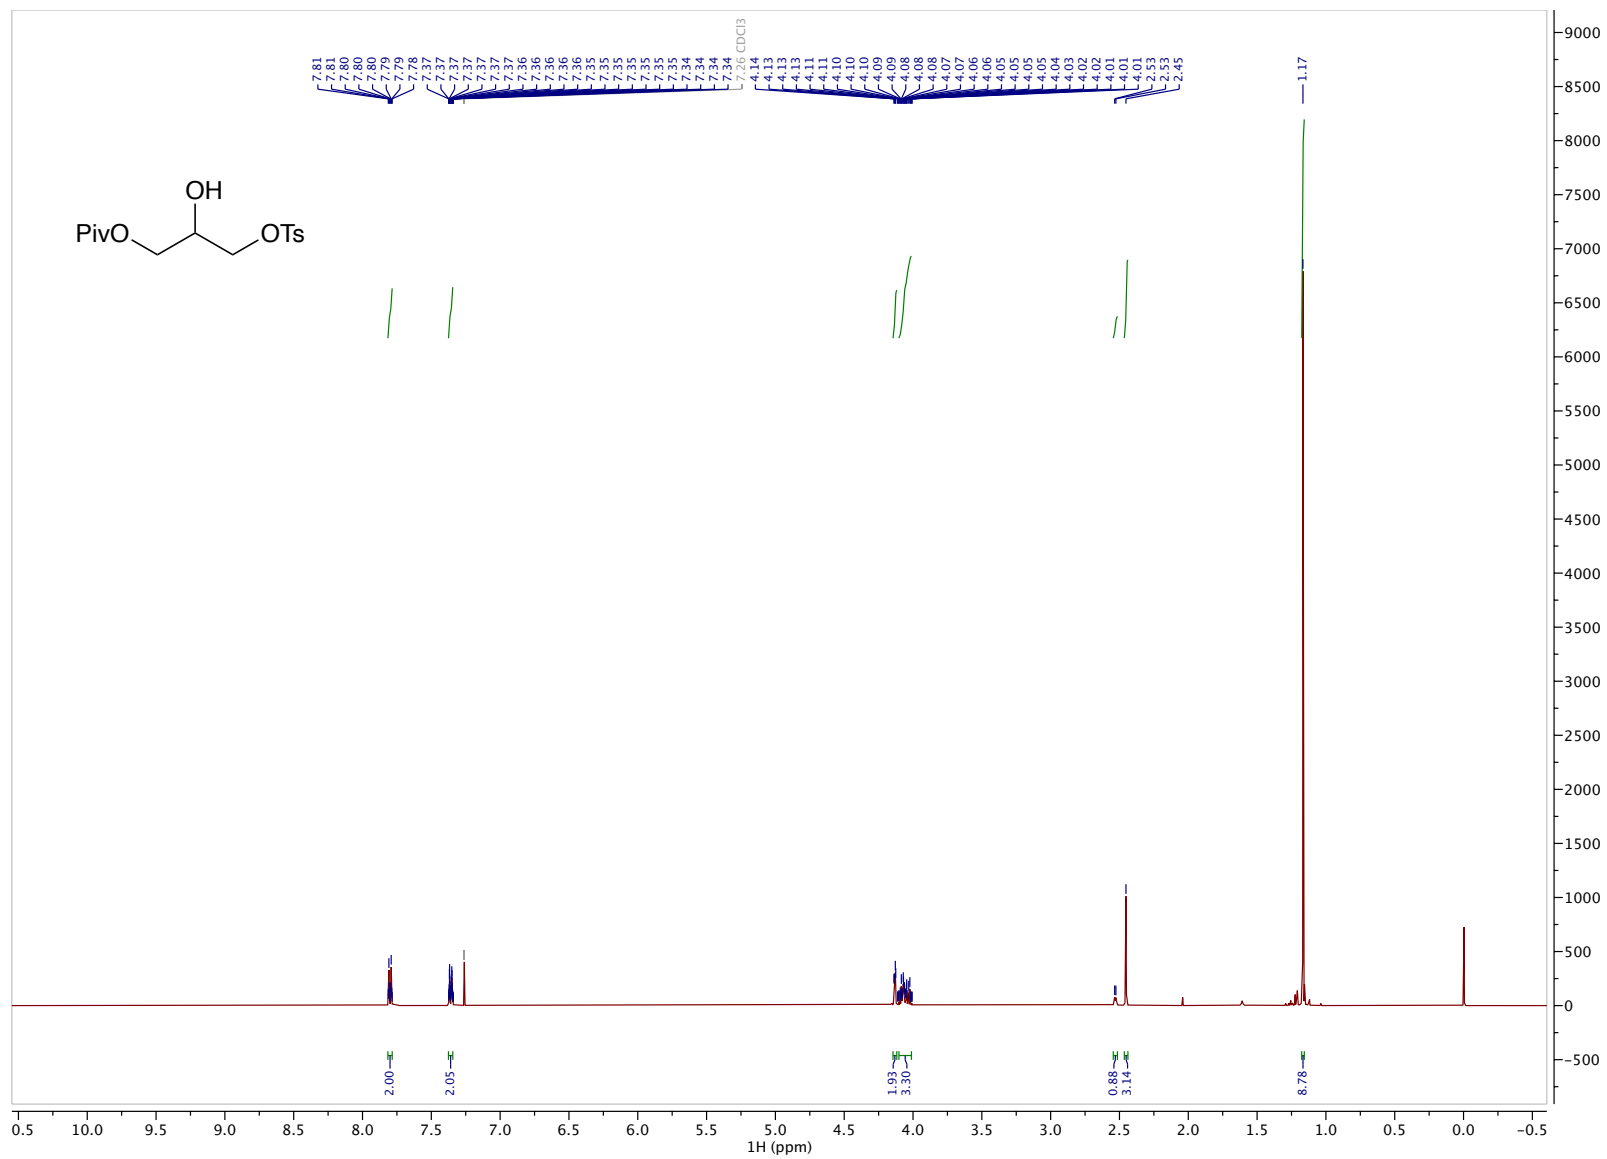

**(1e) – 1-*O*-tosyl-3-*O*-pivaloylglycerol**

$^{13}\text{C}$  NMR (126 MHz,  $\text{CDCl}_3$ )

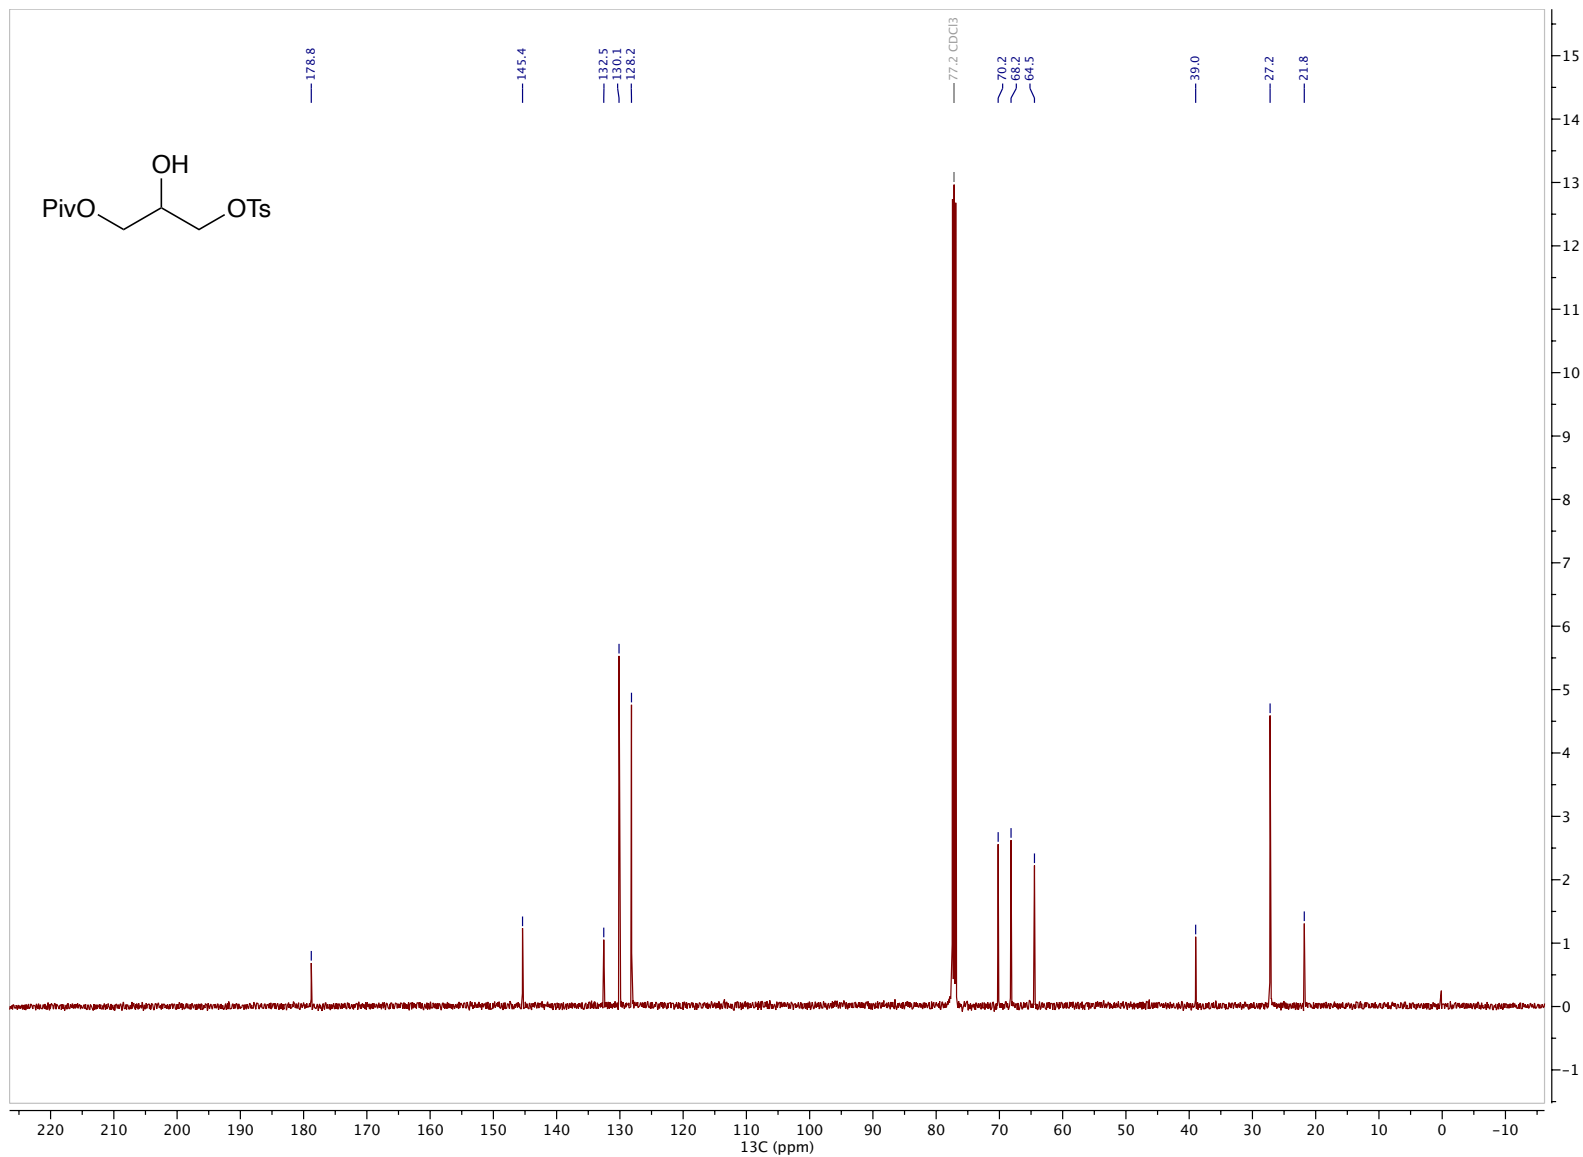

**(1e) – 1-O-tosyl-3-O-pivaloylglycerol**  
COSY NMR (500 MHz, CDCl<sub>3</sub>)

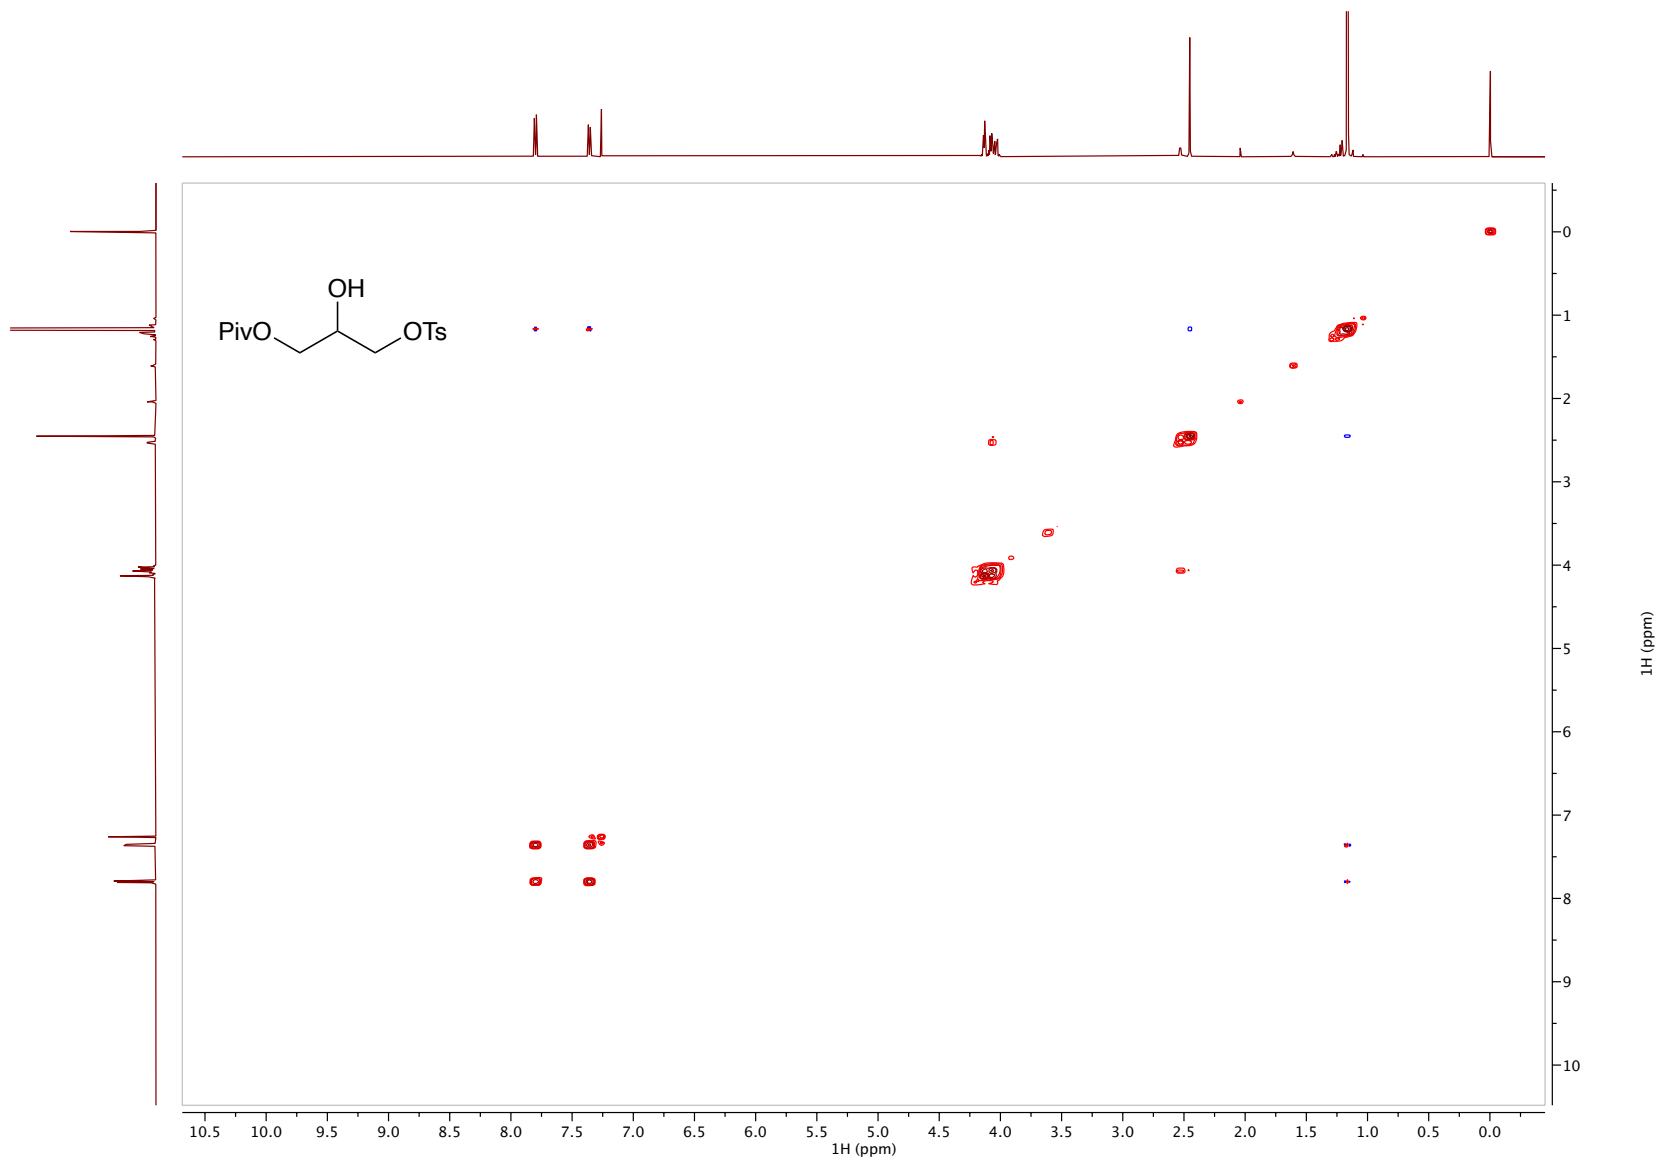



## 7.0 Calculated Structures

Cartesian coordinates for intermediates and transitions states identified. Optimized at (U)M062X/def2TZVP level, best conformer only.

### 7.1 Acetyl

#### Ac-I

|   |          |          |          |
|---|----------|----------|----------|
| O | -2.36600 | -1.20861 | -0.49703 |
| C | -1.02764 | -1.51208 | -0.21932 |
| C | -0.10821 | -0.30100 | -0.39589 |
| C | -0.69773 | 0.92346  | 0.21677  |
| C | -2.18248 | 1.07139  | 0.26452  |
| C | -2.87483 | -0.26948 | 0.43123  |
| O | 1.12947  | -0.73386 | 0.23958  |
| C | 2.26052  | -0.09414 | -0.04043 |
| C | 3.45340  | -0.79535 | 0.53711  |
| O | -0.05477 | 2.10430  | 0.05622  |
| O | 2.31434  | 0.92651  | -0.68455 |
| H | -2.73248 | -0.65291 | 1.44981  |
| H | -2.52299 | 1.53836  | -0.66973 |
| H | 0.84865  | 1.94313  | -0.26663 |
| H | -0.72108 | -2.31055 | -0.89311 |
| H | -0.91882 | -1.86506 | 0.81427  |
| H | 3.56412  | -1.76764 | 0.05723  |
| H | 4.34176  | -0.19399 | 0.37435  |
| H | 3.29535  | -0.96781 | 1.60072  |
| H | -3.94268 | -0.18593 | 0.23762  |
| H | -2.45806 | 1.75278  | 1.07369  |
| H | 0.12374  | -0.13384 | -1.45604 |

#### Ac-TS1a

|   |         |         |         |
|---|---------|---------|---------|
| O | 0.84974 | 0.29931 | 1.10658 |
|---|---------|---------|---------|

|   |          |          |          |
|---|----------|----------|----------|
| C | 1.69878  | -0.41963 | 0.50159  |
| O | 1.18592  | -1.13294 | -0.53432 |
| C | -0.12305 | -0.59885 | -0.87348 |
| C | -0.18525 | 0.79795  | -0.35849 |
| C | -1.44323 | 1.35360  | 0.21888  |
| C | -2.29425 | 0.24605  | 0.82647  |
| O | -2.41890 | -0.83061 | -0.07775 |
| C | -1.18893 | -1.49520 | -0.23494 |
| O | 0.59720  | 1.63511  | -1.09495 |
| C | 3.16638  | -0.15883 | 0.44153  |
| H | -1.84076 | -0.10373 | 1.76055  |
| H | -2.00619 | 1.84817  | -0.58086 |
| H | 0.59669  | 2.51177  | -0.69430 |
| H | -1.36806 | -2.36924 | -0.85820 |
| H | -0.80749 | -1.82748 | 0.73720  |
| H | 3.48748  | 0.33027  | 1.35773  |
| H | 3.71452  | -1.09200 | 0.31758  |
| H | 3.39893  | 0.48428  | -0.41524 |
| H | -3.30068 | 0.60479  | 1.03479  |
| H | -1.20338 | 2.10659  | 0.97732  |
| H | -0.16550 | -0.61088 | -1.96230 |

**Ac-II**

|   |          |          |          |
|---|----------|----------|----------|
| O | -0.79711 | 0.57011  | -0.85166 |
| C | 0.21243  | 0.91605  | 0.09377  |
| C | 0.08012  | -0.26174 | 1.06629  |
| O | -1.32111 | -0.52693 | 1.04093  |
| C | -1.82741 | 0.02859  | -0.11964 |
| C | 1.55960  | 1.03801  | -0.57839 |
| C | 2.11450  | -0.32130 | -0.96778 |
| O | 2.13319  | -1.18929 | 0.14889  |

|   |          |          |          |
|---|----------|----------|----------|
| C | 0.82809  | -1.49948 | 0.56634  |
| O | -0.07965 | 2.14050  | 0.69274  |
| C | -2.82547 | -0.76782 | -0.87369 |
| H | 1.51385  | -0.76648 | -1.77064 |
| H | 2.23272  | 1.51749  | 0.13314  |
| H | -0.97651 | 2.10367  | 1.04956  |
| H | 0.90193  | -2.24312 | 1.35821  |
| H | 0.25317  | -1.93138 | -0.26388 |
| H | -3.62412 | -1.08281 | -0.20506 |
| H | -3.24762 | -0.16710 | -1.67688 |
| H | -2.36232 | -1.66177 | -1.31005 |
| H | 3.14297  | -0.23183 | -1.31305 |
| H | 1.45379  | 1.69294  | -1.44427 |
| H | 0.37845  | 0.02137  | 2.07433  |

**Ac-TS1b**

|   |          |          |          |
|---|----------|----------|----------|
| O | -0.80311 | 0.55467  | -0.89220 |
| C | 0.29870  | 0.97284  | -0.02249 |
| C | 0.20676  | 0.08672  | 1.19010  |
| O | -1.58850 | 0.04799  | 1.09704  |
| C | -1.74671 | -0.06820 | -0.15798 |
| C | 1.57951  | 0.76980  | -0.80619 |
| C | 1.88404  | -0.71454 | -0.94515 |
| O | 1.95461  | -1.34304 | 0.31810  |
| C | 0.70562  | -1.31404 | 0.98774  |
| O | 0.15582  | 2.31872  | 0.27516  |
| C | -2.56358 | -1.10866 | -0.84334 |
| H | 1.11458  | -1.20036 | -1.55996 |
| H | 2.38526  | 1.26612  | -0.26461 |
| H | -0.63989 | 2.42570  | 0.81114  |

|   |          |          |          |
|---|----------|----------|----------|
| H | 0.84355  | -1.82392 | 1.93833  |
| H | -0.03165 | -1.88042 | 0.39666  |
| H | -3.14121 | -1.65322 | -0.10059 |
| H | -3.24978 | -0.64771 | -1.55559 |
| H | -1.92895 | -1.80194 | -1.40426 |
| H | 2.85141  | -0.86490 | -1.42162 |
| H | 1.47122  | 1.24543  | -1.78219 |
| H | 0.38884  | 0.56495  | 2.14179  |

### Ac-III

|   |          |          |          |
|---|----------|----------|----------|
| C | 1.61166  | -0.79608 | 1.29376  |
| C | 0.66968  | 0.35565  | 1.21544  |
| C | 0.18342  | 0.76662  | -0.13408 |
| O | -0.37228 | 2.02910  | -0.17852 |
| C | 1.31174  | 0.69060  | -1.14713 |
| C | 2.08547  | -0.61047 | -0.99264 |
| O | 2.62253  | -0.73023 | 0.30762  |
| O | -0.79946 | -0.22898 | -0.61245 |
| H | 1.43457  | -1.46745 | -1.20971 |
| H | 1.97366  | 1.53640  | -0.95894 |
| C | -1.96698 | -0.29783 | 0.03085  |
| H | -1.07988 | 2.05925  | 0.48081  |
| O | -2.26202 | 0.40769  | 0.96391  |
| C | -2.86187 | -1.35025 | -0.55624 |
| H | 2.11377  | -0.82362 | 2.25997  |
| H | 1.06003  | -1.74659 | 1.17894  |
| H | -3.78606 | -1.39670 | 0.01075  |
| H | -3.06976 | -1.10511 | -1.59748 |
| H | -2.35443 | -2.31415 | -0.53898 |
| H | 2.92974  | -0.63748 | -1.67969 |
| H | 0.88998  | 0.78710  | -2.14810 |

|   |         |         |         |
|---|---------|---------|---------|
| H | 0.17947 | 0.73821 | 2.09820 |
|---|---------|---------|---------|

**Ac-TS2**

|   |          |          |          |
|---|----------|----------|----------|
| C | -1.35424 | -1.40635 | -0.74118 |
| C | -0.60395 | -0.19451 | -1.20794 |
| C | -0.58220 | 0.95539  | -0.42331 |
| O | -0.13898 | 2.07278  | -0.99975 |
| C | -1.41583 | 1.05018  | 0.81385  |
| C | -1.73370 | -0.35124 | 1.31566  |
| O | -2.29380 | -1.11585 | 0.27070  |
| O | 1.47191  | -0.93203 | -0.84623 |
| H | -0.81835 | -0.82159 | 1.69167  |
| H | -2.34497 | 1.56689  | 0.55280  |
| C | 1.85917  | -0.26366 | 0.13212  |
| H | 0.00570  | 2.74917  | -0.32641 |
| O | 1.17061  | 0.58766  | 0.75082  |
| C | 3.28801  | -0.47065 | 0.61369  |
| H | -1.91617 | -1.83580 | -1.57082 |
| H | -0.63239 | -2.15581 | -0.39470 |
| H | 3.32416  | -0.42235 | 1.69947  |
| H | 3.67909  | -1.41611 | 0.24972  |
| H | 3.89413  | 0.34441  | 0.21653  |
| H | -2.47249 | -0.31911 | 2.11420  |
| H | -0.88726 | 1.62983  | 1.57173  |
| H | -0.25301 | -0.13494 | -2.22594 |

**Ac-TS3**

|   |         |          |         |
|---|---------|----------|---------|
| C | 1.37553 | -1.07261 | 1.16249 |
| C | 0.84289 | 0.32014  | 1.22374 |
| C | 0.82577 | 1.11927  | 0.09768 |

|   |          |          |          |
|---|----------|----------|----------|
| O | 0.59417  | 2.42480  | 0.11992  |
| C | 1.35042  | 0.61761  | -1.20221 |
| C | 1.49925  | -0.89945 | -1.16654 |
| O | 2.16895  | -1.28619 | 0.01958  |
| O | -1.30556 | 0.74452  | 0.06605  |
| H | 0.51721  | -1.37643 | -1.21479 |
| H | 2.31871  | 1.09720  | -1.37404 |
| C | -1.95885 | -0.37074 | -0.02837 |
| H | 0.08686  | 2.66156  | 0.90753  |
| O | -1.48095 | -1.49040 | 0.02330  |
| C | -3.45289 | -0.15226 | -0.21736 |
| H | 2.01726  | -1.24860 | 2.02881  |
| H | 0.53708  | -1.77864 | 1.19867  |
| H | -3.86232 | 0.31785  | 0.67655  |
| H | -3.62780 | 0.52056  | -1.05548 |
| H | -3.93689 | -1.10976 | -0.38885 |
| H | 2.11310  | -1.24225 | -1.99700 |
| H | 0.67101  | 0.94312  | -1.99097 |
| H | 0.46012  | 0.70174  | 2.16223  |

#### Ac-TS4

|   |          |          |          |
|---|----------|----------|----------|
| C | -1.32118 | -1.11031 | -1.11990 |
| C | -0.60811 | 0.19856  | -1.22502 |
| C | -0.63471 | 1.06846  | -0.13915 |
| O | 0.12934  | 2.12843  | -0.10357 |
| C | -1.58292 | 0.87655  | 0.98875  |
| C | -2.03590 | -0.58186 | 1.05080  |
| O | -2.41273 | -1.03968 | -0.23275 |
| O | 1.74938  | 0.21083  | -0.99610 |
| H | -1.22313 | -1.19295 | 1.44954  |
| H | -2.44261 | 1.53380  | 0.82231  |

|   |          |          |          |
|---|----------|----------|----------|
| C | 1.91007  | -0.32776 | 0.14820  |
| H | 0.90462  | 1.92626  | -0.67354 |
| O | 1.01107  | -0.52644 | 0.97393  |
| C | 3.33763  | -0.73854 | 0.47947  |
| H | -1.72029 | -1.40601 | -2.08937 |
| H | -0.59736 | -1.87057 | -0.79371 |
| H | 3.38897  | -1.16181 | 1.47816  |
| H | 3.67311  | -1.46677 | -0.25837 |
| H | 3.98962  | 0.13061  | 0.40136  |
| H | -2.91568 | -0.67935 | 1.68354  |
| H | -1.08887 | 1.18179  | 1.91070  |
| H | -0.17409 | 0.50920  | -2.16159 |

**Ac-TS5**

|   |          |          |          |
|---|----------|----------|----------|
| O | -2.57875 | -1.06099 | -0.26766 |
| C | -1.29765 | -1.39505 | -0.75101 |
| C | -0.36303 | -0.21547 | -0.81117 |
| C | -0.73379 | 0.99049  | -0.20227 |
| C | -1.98810 | 1.09956  | 0.59845  |
| C | -2.51446 | -0.29485 | 0.91469  |
| O | 1.12829  | -0.85666 | 0.31278  |
| C | 2.19668  | -0.19178 | 0.11381  |
| C | 3.47489  | -0.83215 | 0.59955  |
| O | 0.04811  | 2.03034  | -0.24632 |
| O | 2.25713  | 0.90812  | -0.46853 |
| H | -1.86268 | -0.78763 | 1.64720  |
| H | -2.73247 | 1.65843  | 0.02341  |
| H | 1.00627  | 1.68657  | -0.46911 |
| H | -1.44285 | -1.80359 | -1.75075 |
| H | -0.83889 | -2.17001 | -0.12578 |
| H | 3.90846  | -1.38659 | -0.23439 |

|   |          |          |          |
|---|----------|----------|----------|
| H | 4.17973  | -0.06196 | 0.90208  |
| H | 3.27644  | -1.52604 | 1.41176  |
| H | -3.52352 | -0.25089 | 1.32025  |
| H | -1.77934 | 1.66907  | 1.50593  |
| H | 0.32344  | -0.15834 | -1.64500 |

**Ac-TS6**

|   |          |          |          |
|---|----------|----------|----------|
| C | -2.31216 | -0.43532 | -1.06086 |
| C | -1.31589 | 0.66397  | -1.15620 |
| C | -0.40865 | 0.90229  | -0.07269 |
| O | 0.37798  | 1.92686  | -0.15390 |
| C | -0.79787 | 0.35352  | 1.27275  |
| C | -1.62400 | -0.91609 | 1.12654  |
| O | -2.72044 | -0.69277 | 0.26007  |
| O | 2.32196  | 0.72570  | 0.59647  |
| H | -0.99867 | -1.72808 | 0.74173  |
| H | -1.40594 | 1.13103  | 1.74673  |
| C | 2.03270  | -0.30893 | -0.05677 |
| H | 1.28325  | 1.61005  | 0.33680  |
| O | 0.87174  | -0.57809 | -0.48654 |
| C | 3.13417  | -1.28822 | -0.37079 |
| H | -3.20925 | -0.19576 | -1.63330 |
| H | -1.86768 | -1.34210 | -1.50695 |
| H | 3.84668  | -1.31332 | 0.45061  |
| H | 2.72924  | -2.27633 | -0.57151 |
| H | 3.65537  | -0.93299 | -1.26122 |
| H | -2.04505 | -1.21505 | 2.08452  |
| H | 0.09233  | 0.20320  | 1.88253  |
| H | -1.14009 | 1.17826  | -2.09054 |



**Ac-IV**

|   |          |          |          |
|---|----------|----------|----------|
| C | -2.70094 | -0.24099 | -1.01562 |
| C | -1.75119 | 0.89772  | -0.92097 |
| C | -0.83866 | 1.04006  | 0.17258  |
| O | -0.00734 | 1.95037  | 0.18807  |
| C | -0.93829 | 0.02201  | 1.28194  |
| C | -1.59250 | -1.25576 | 0.77729  |
| O | -2.84409 | -0.95305 | 0.18442  |
| O | 2.50426  | 0.90448  | 0.39859  |
| H | -0.93593 | -1.74801 | 0.05106  |
| H | -1.55080 | 0.45671  | 2.07743  |
| C | 2.40727  | -0.28047 | -0.19630 |
| H | 1.62006  | 1.34032  | 0.42369  |
| O | 1.36316  | -0.75661 | -0.57253 |
| C | 3.74352  | -0.95052 | -0.33897 |
| H | -3.69520 | 0.11095  | -1.30335 |
| H | -2.35499 | -0.91059 | -1.82247 |
| H | 4.22055  | -1.02530 | 0.63764  |
| H | 3.61641  | -1.93465 | -0.77804 |
| H | 4.38556  | -0.33600 | -0.96990 |
| H | -1.79624 | -1.94564 | 1.59385  |
| H | 0.05832  | -0.16226 | 1.68165  |
| H | -1.67091 | 1.60070  | -1.73972 |

**V**

|   |          |          |          |
|---|----------|----------|----------|
| C | -1.16357 | -1.18390 | 0.03550  |
| C | 0.32207  | -1.23784 | 0.06893  |
| C | 1.13944  | -0.06134 | -0.02161 |
| O | 2.36224  | -0.12685 | 0.00045  |
| C | 0.41000  | 1.26207  | -0.14443 |
| C | -1.03345 | 1.13435  | 0.31925  |

|   |          |          |          |
|---|----------|----------|----------|
| O | -1.67015 | 0.06671  | -0.35569 |
| H | -1.07579 | 0.96484  | 1.40395  |
| H | 0.43139  | 1.56121  | -1.19538 |
| H | -1.55855 | -1.92242 | -0.66716 |
| H | -1.55264 | -1.45764 | 1.03195  |
| H | -1.60650 | 2.03173  | 0.09337  |
| H | 0.95819  | 2.01255  | 0.42567  |
| H | 0.82020  | -2.18916 | 0.20362  |

#### Ac-VI

|   |          |          |          |
|---|----------|----------|----------|
| C | 0.00000  | 0.15473  | 0.00000  |
| O | 0.18833  | 1.33761  | 0.00000  |
| O | -1.23826 | -0.37849 | 0.00000  |
| H | -1.86478 | 0.35940  | 0.00000  |
| C | 1.05840  | -0.90692 | 0.00000  |
| H | 0.93783  | -1.53912 | 0.87918  |
| H | 0.93783  | -1.53912 | -0.87918 |
| H | 2.03812  | -0.44103 | 0.00000  |

#### VII

|   |          |          |          |
|---|----------|----------|----------|
| C | -1.21093 | -1.17363 | 0.02761  |
| C | 0.26069  | -1.24480 | 0.08727  |
| C | 1.02771  | -0.06751 | -0.01590 |
| O | 2.31202  | -0.21492 | -0.00672 |
| C | 0.37255  | 1.25854  | -0.12354 |
| C | -1.09172 | 1.14586  | 0.31492  |
| O | -1.69727 | 0.07086  | -0.36650 |
| H | -1.15809 | 1.00392  | 1.39971  |
| H | 0.41745  | 1.56216  | -1.17749 |
| H | 2.80281  | 0.62286  | -0.07285 |

|   |          |          |          |
|---|----------|----------|----------|
| H | -1.58864 | -1.92835 | -0.67121 |
| H | -1.59393 | -1.47242 | 1.02314  |
| H | -1.63823 | 2.04540  | 0.04632  |
| H | 0.92499  | 2.00032  | 0.45947  |
| H | 0.76588  | -2.19208 | 0.23647  |

**Ac-VIII**

|   |          |          |          |
|---|----------|----------|----------|
| C | 0.00000  | 0.21141  | 0.00000  |
| O | 1.10288  | 0.79312  | 0.00000  |
| O | -1.14823 | 0.70058  | 0.00000  |
| C | 0.04425  | -1.34416 | 0.00000  |
| H | -0.48581 | -1.71839 | 0.87899  |
| H | -0.48581 | -1.71839 | -0.87899 |
| H | 1.06891  | -1.71635 | 0.00000  |

**7.2 Pivaloyl**

**Piv-I**

|   |          |          |          |
|---|----------|----------|----------|
| O | -3.11856 | -1.36595 | -0.48174 |
| C | -1.73599 | -1.49939 | -0.30410 |
| C | -0.99591 | -0.17271 | -0.48903 |
| C | -1.69165 | 0.93953  | 0.21865  |
| C | -3.17669 | 0.89196  | 0.36326  |
| C | -3.67911 | -0.53280 | 0.51543  |
| O | 0.32996  | -0.45826 | 0.03838  |
| C | 1.34915  | 0.32669  | -0.29988 |
| C | 2.68625  | -0.23094 | 0.16144  |
| O | -1.21281 | 2.19824  | 0.07725  |
| O | 1.21284  | 1.36453  | -0.90573 |
| H | -3.42032 | -0.92851 | 1.50605  |

|   |          |          |          |
|---|----------|----------|----------|
| H | -3.63567 | 1.34221  | -0.52760 |
| H | -0.32492 | 2.16597  | -0.31958 |
| H | -1.37650 | -2.22787 | -1.02931 |
| H | -1.51125 | -1.86903 | 0.70487  |
| C | 2.91181  | -1.58514 | -0.52217 |
| C | 3.79096  | 0.74700  | -0.22318 |
| C | 2.64309  | -0.41590 | 1.68311  |
| H | -4.75951 | -0.58274 | 0.39277  |
| H | -3.48274 | 1.50337  | 1.21618  |
| H | -0.86887 | 0.06131  | -1.55437 |
| H | 3.82321  | 0.89824  | -1.30177 |
| H | 4.75351  | 0.35148  | 0.10418  |
| H | 3.63533  | 1.71840  | 0.24557  |
| H | 2.91789  | -1.48024 | -1.60866 |
| H | 2.13829  | -2.29998 | -0.24400 |
| H | 3.87985  | -1.98418 | -0.21527 |
| H | 1.87018  | -1.12652 | 1.97215  |
| H | 2.44978  | 0.53201  | 2.18818  |
| H | 3.60885  | -0.79221 | 2.02408  |

**Piv-TS1a**

|   |          |          |          |
|---|----------|----------|----------|
| O | 0.09181  | 0.33611  | 0.97463  |
| C | 0.91450  | -0.35188 | 0.30119  |
| O | 0.35137  | -1.03899 | -0.72635 |
| C | -1.00707 | -0.56439 | -0.93391 |
| C | -1.09830 | 0.81346  | -0.37520 |
| C | -2.31928 | 1.27567  | 0.34787  |
| C | -3.04467 | 0.10342  | 0.99477  |
| O | -3.20141 | -0.94894 | 0.06706  |
| C | -1.95988 | -1.53822 | -0.23153 |

|   |          |          |          |
|---|----------|----------|----------|
| O | -0.46132 | 1.71669  | -1.17043 |
| C | 2.40089  | -0.09465 | 0.19329  |
| H | -2.48220 | -0.25007 | 1.86604  |
| H | -2.98658 | 1.76313  | -0.37186 |
| H | -0.48800 | 2.58716  | -0.75723 |
| H | -2.15237 | -2.40000 | -0.86774 |
| H | -1.46949 | -1.88095 | 0.68680  |
| C | 2.90838  | 0.42478  | 1.53587  |
| C | 3.10915  | -1.40221 | -0.16868 |
| C | 2.66139  | 0.94934  | -0.90380 |
| H | -4.04285 | 0.39760  | 1.31427  |
| H | -2.04393 | 2.01563  | 1.10727  |
| H | -1.14509 | -0.55141 | -2.01471 |
| H | 2.23233  | 0.62887  | -1.85363 |
| H | 3.73753  | 1.08734  | -1.03433 |
| H | 2.21988  | 1.90914  | -0.63504 |
| H | 3.97708  | 0.63671  | 1.46915  |
| H | 2.74971  | -0.31385 | 2.32330  |
| H | 2.38801  | 1.33907  | 1.82065  |
| H | 2.76249  | -1.78115 | -1.12980 |
| H | 2.92364  | -2.16631 | 0.58834  |
| H | 4.18558  | -1.23186 | -0.22991 |

**Piv-II**

|   |          |          |          |
|---|----------|----------|----------|
| C | -1.83736 | -1.56251 | -0.31182 |
| C | -1.01357 | -0.48322 | -1.02246 |
| C | -1.00219 | 0.83354  | -0.24998 |
| O | -0.62079 | 1.83955  | -1.14468 |
| C | -2.29096 | 1.17077  | 0.47526  |
| C | -2.90653 | -0.06563 | 1.10906  |

|   |          |          |          |
|---|----------|----------|----------|
| O | -3.07853 | -1.07468 | 0.13500  |
| O | 0.36008  | -0.84425 | -1.00039 |
| H | -2.27086 | -0.43698 | 1.92236  |
| H | -2.98534 | 1.58059  | -0.25935 |
| C | 0.86652  | -0.39382 | 0.19378  |
| H | -0.46704 | 2.64867  | -0.64333 |
| O | 0.03670  | 0.59880  | 0.69107  |
| C | 2.34859  | -0.14315 | 0.23367  |
| H | -2.03556 | -2.39003 | -0.99059 |
| H | -1.24624 | -1.93785 | 0.53372  |
| C | 2.75419  | 0.16280  | 1.67524  |
| C | 3.06695  | -1.39929 | -0.25875 |
| C | 2.69090  | 1.04784  | -0.67273 |
| H | -3.89370 | 0.15594  | 1.51123  |
| H | -2.08491 | 1.93767  | 1.22626  |
| H | -1.32078 | -0.33236 | -2.05475 |
| H | 2.80831  | -2.25924 | 0.36162  |
| H | 4.14687  | -1.24924 | -0.20914 |
| H | 2.79609  | -1.62596 | -1.28990 |
| H | 2.20858  | 1.95702  | -0.31154 |
| H | 2.35524  | 0.86497  | -1.69401 |
| H | 3.77061  | 1.21109  | -0.68143 |
| H | 2.52336  | -0.68057 | 2.32831  |
| H | 2.22885  | 1.04148  | 2.05060  |
| H | 3.82753  | 0.35534  | 1.72427  |

**Piv-TS1b**

|   |          |         |          |
|---|----------|---------|----------|
| O | -0.02657 | 0.78748 | -0.71757 |
| C | 1.29571  | 0.95830 | -0.11122 |
| C | 1.22590  | 0.25369 | 1.21546  |

|   |          |          |          |
|---|----------|----------|----------|
| O | -0.50772 | 0.68734  | 1.41455  |
| C | -0.92732 | 0.50619  | 0.23941  |
| C | 2.29395  | 0.33173  | -1.06350 |
| C | 2.16557  | -1.18460 | -1.03616 |
| O | 2.33565  | -1.68992 | 0.27115  |
| C | 1.31350  | -1.23866 | 1.14675  |
| O | 1.56299  | 2.31341  | 0.00264  |
| C | -2.19577 | -0.19954 | -0.17147 |
| H | 1.18442  | -1.48515 | -1.42752 |
| H | 3.29320  | 0.62768  | -0.74326 |
| H | 0.96541  | 2.68500  | 0.66322  |
| H | 1.52515  | -1.66633 | 2.12407  |
| H | 0.34653  | -1.64070 | 0.79753  |
| C | -2.86306 | -0.78399 | 1.07011  |
| C | -3.12004 | 0.84515  | -0.82034 |
| C | -1.90421 | -1.30480 | -1.19440 |
| H | 2.93692  | -1.64591 | -1.65087 |
| H | 2.11802  | 0.72547  | -2.06602 |
| H | 1.68826  | 0.76109  | 2.04940  |
| H | -3.80123 | -1.26292 | 0.78599  |
| H | -3.07505 | -0.00677 | 1.80400  |
| H | -2.22312 | -1.52902 | 1.54510  |
| H | -1.38133 | -0.90497 | -2.06290 |
| H | -2.84477 | -1.74581 | -1.53015 |
| H | -1.29616 | -2.09907 | -0.75831 |
| H | -2.64503 | 1.29217  | -1.69454 |
| H | -3.36173 | 1.63949  | -0.11281 |
| H | -4.04959 | 0.36833  | -1.13691 |

Piv-III

|   |          |          |          |
|---|----------|----------|----------|
| C | 2.19755  | -0.79468 | 1.38868  |
| C | 1.63484  | 0.56410  | 1.15049  |
| C | 1.16452  | 0.88075  | -0.23001 |
| O | 0.97296  | 2.22532  | -0.47418 |
| C | 2.13907  | 0.32759  | -1.25508 |
| C | 2.52349  | -1.10417 | -0.91046 |
| O | 3.10407  | -1.18134 | 0.37396  |
| O | -0.08594 | 0.13996  | -0.48588 |
| H | 1.64118  | -1.75599 | -0.96168 |
| H | 3.02562  | 0.96211  | -1.23665 |
| C | -1.16498 | 0.48322  | 0.22224  |
| H | 0.35244  | 2.55446  | 0.19134  |
| O | -1.17459 | 1.39493  | 1.01395  |
| C | -2.35795 | -0.41166 | -0.07986 |
| H | 2.74227  | -0.83372 | 2.33087  |
| H | 1.38230  | -1.53900 | 1.44280  |
| C | -3.55754 | 0.07049  | 0.72757  |
| C | -2.66421 | -0.34984 | -1.58064 |
| C | -1.98951 | -1.84624 | 0.31897  |
| H | 3.26881  | -1.47945 | -1.60992 |
| H | 1.68011  | 0.38950  | -2.24252 |
| H | 1.37584  | 1.21860  | 1.96905  |
| H | -3.53089 | -0.97702 | -1.79605 |
| H | -1.82075 | -0.70669 | -2.16999 |
| H | -2.89706 | 0.67024  | -1.89080 |
| H | -4.41554 | -0.57081 | 0.52028  |
| H | -3.81759 | 1.09636  | 0.46747  |
| H | -3.34833 | 0.04095  | 1.79652  |
| H | -2.84232 | -2.50224 | 0.13672  |
| H | -1.73770 | -1.90519 | 1.37989  |
| H | -1.14203 | -2.21039 | -0.26155 |



**Piv-TS2**

|   |          |          |          |
|---|----------|----------|----------|
| C | -2.12622 | -1.40236 | -0.84721 |
| C | -1.60039 | -0.05277 | -1.23655 |
| C | -1.60414 | 0.98835  | -0.31378 |
| O | -1.38104 | 2.21606  | -0.78391 |
| C | -2.25816 | 0.82174  | 1.02034  |
| C | -2.32804 | -0.65912 | 1.36519  |
| O | -2.93674 | -1.36631 | 0.30713  |
| O | 0.57774  | -0.54235 | -1.23526 |
| H | -1.31744 | -1.03914 | 1.55403  |
| H | -3.27100 | 1.23130  | 0.95104  |
| C | 1.01465  | 0.02832  | -0.21795 |
| H | -1.21803 | 2.81989  | -0.04870 |
| O | 0.32594  | 0.72028  | 0.57453  |
| C | 2.51046  | -0.14489 | 0.13956  |
| H | -2.74723 | -1.80300 | -1.64874 |
| H | -1.27827 | -2.08293 | -0.70170 |
| C | 2.56375  | -0.98294 | 1.42074  |
| C | 3.25714  | -0.85354 | -0.98401 |
| C | 3.11705  | 1.23501  | 0.39528  |
| H | -2.94188 | -0.82363 | 2.24876  |
| H | -1.70168 | 1.37656  | 1.77683  |
| H | -1.40564 | 0.17258  | -2.27307 |
| H | 2.03564  | -0.48104 | 2.23138  |
| H | 3.60348  | -1.13342 | 1.71927  |
| H | 2.11151  | -1.96461 | 1.26340  |
| H | 3.06408  | 1.85698  | -0.50048 |
| H | 4.16817  | 1.12844  | 0.67206  |
| H | 2.59029  | 1.74473  | 1.20067  |
| H | 3.20097  | -0.28359 | -1.91154 |

|   |         |          |          |
|---|---------|----------|----------|
| H | 2.83535 | -1.83969 | -1.17413 |
| H | 4.30793 | -0.96783 | -0.70869 |

**Piv-TS3**

|   |          |          |          |
|---|----------|----------|----------|
| C | -1.84048 | -1.39799 | -0.90528 |
| C | -1.60449 | 0.05287  | -1.17351 |
| C | -2.00720 | 0.99313  | -0.27288 |
| O | -1.93073 | 2.28118  | -0.59680 |
| C | -2.51203 | 0.61749  | 1.07765  |
| C | -2.31085 | -0.87736 | 1.32080  |
| O | -2.70831 | -1.61119 | 0.18591  |
| O | 0.23879  | 0.44339  | 0.22250  |
| H | -1.25759 | -1.06812 | 1.54873  |
| H | -3.57164 | 0.88333  | 1.14594  |
| C | 1.19565  | -0.03667 | -0.49910 |
| H | -2.07606 | 2.83478  | 0.17928  |
| O | 1.09250  | -0.50160 | -1.62097 |
| C | 2.56149  | -0.00795 | 0.23909  |
| H | -2.31203 | -1.85896 | -1.77470 |
| H | -0.87420 | -1.89214 | -0.74773 |
| C | 2.84981  | 1.41246  | 0.72662  |
| C | 2.46373  | -0.96168 | 1.43315  |
| C | 3.65439  | -0.47207 | -0.71608 |
| H | -2.92674 | -1.21774 | 2.15098  |
| H | -1.96375 | 1.19856  | 1.82629  |
| H | -1.17126 | 0.35607  | -2.11491 |
| H | 2.21945  | -1.97408 | 1.10401  |
| H | 1.69767  | -0.62984 | 2.13423  |
| H | 3.42193  | -0.99846 | 1.95613  |
| H | 2.88556  | 2.11245  | -0.11034 |

|   |         |          |          |
|---|---------|----------|----------|
| H | 3.81800 | 1.43847  | 1.23161  |
| H | 2.08292 | 1.74895  | 1.42321  |
| H | 3.71640 | 0.18228  | -1.58537 |
| H | 3.45616 | -1.48080 | -1.07563 |
| H | 4.61697 | -0.46227 | -0.19952 |

**Piv-TS4**

|   |          |          |          |
|---|----------|----------|----------|
| C | 2.13840  | -1.03722 | 1.22558  |
| C | 1.60706  | 0.35899  | 1.19403  |
| C | 1.65664  | 1.07105  | 0.00029  |
| O | 1.03342  | 2.21311  | -0.13264 |
| C | 2.48199  | 0.61090  | -1.14665 |
| C | 2.73872  | -0.89167 | -1.03813 |
| O | 3.15422  | -1.23185 | 0.26974  |
| O | -0.74031 | 0.66536  | 1.11482  |
| H | 1.82575  | -1.43101 | -1.30028 |
| H | 3.42887  | 1.16003  | -1.12280 |
| C | -1.05942 | 0.02081  | 0.06373  |
| H | 0.28683  | 2.19352  | 0.50649  |
| O | -0.25651 | -0.39860 | -0.77872 |
| C | -2.57264 | -0.23780 | -0.12360 |
| H | 2.57459  | -1.25724 | 2.19925  |
| H | 1.29995  | -1.72783 | 1.05535  |
| C | -2.83618 | -0.91222 | -1.46401 |
| C | -3.02599 | -1.14458 | 1.02425  |
| C | -3.31080 | 1.09995  | -0.04748 |
| H | 3.54598  | -1.18790 | -1.70480 |
| H | 1.96115  | 0.86222  | -2.07010 |
| H | 1.28930  | 0.84130  | 2.10416  |
| H | -2.30930 | -1.86334 | -1.53314 |
| H | -2.49828 | -0.28593 | -2.28976 |

|   |          |          |          |
|---|----------|----------|----------|
| H | -3.90711 | -1.09430 | -1.57927 |
| H | -3.13652 | 1.58173  | 0.91380  |
| H | -4.38378 | 0.93753  | -0.17096 |
| H | -2.97905 | 1.77477  | -0.83985 |
| H | -2.83508 | -0.67099 | 1.98673  |
| H | -2.50039 | -2.10155 | 0.99593  |
| H | -4.09618 | -1.34439 | 0.93544  |

**Piv-TS5**

|   |          |          |          |
|---|----------|----------|----------|
| O | -3.35749 | -1.25441 | -0.24014 |
| C | -2.08963 | -1.38453 | -0.84195 |
| C | -1.31939 | -0.09091 | -0.88170 |
| C | -1.78311 | 1.01073  | -0.15153 |
| C | -2.96945 | 0.90026  | 0.74696  |
| C | -3.29061 | -0.56903 | 0.99054  |
| O | 0.33483  | -0.60630 | 0.06507  |
| C | 1.29149  | 0.20060  | -0.16246 |
| C | 2.70695  | -0.26908 | 0.19260  |
| O | -1.14266 | 2.14388  | -0.17093 |
| O | 1.15734  | 1.33463  | -0.66687 |
| H | -2.52422 | -1.02205 | 1.63220  |
| H | -3.82295 | 1.39596  | 0.27483  |
| H | -0.17319 | 1.94417  | -0.49726 |
| H | -2.26553 | -1.74252 | -1.85600 |
| H | -1.48650 | -2.13197 | -0.31301 |
| C | 3.51062  | -0.30205 | -1.11240 |
| C | 3.31672  | 0.76173  | 1.14677  |
| C | 2.69546  | -1.64930 | 0.83986  |
| H | -4.26001 | -0.68425 | 1.47178  |
| H | -2.75760 | 1.42832  | 1.67849  |
| H | -0.71957 | 0.11297  | -1.75833 |

|   |         |          |          |
|---|---------|----------|----------|
| H | 3.31982 | 1.75124  | 0.69199  |
| H | 4.34389 | 0.47750  | 1.38315  |
| H | 2.75462 | 0.81085  | 2.08147  |
| H | 3.51927 | 0.68028  | -1.58299 |
| H | 3.08714 | -1.02242 | -1.81537 |
| H | 4.53873 | -0.60105 | -0.89921 |
| H | 2.26518 | -2.39519 | 0.17188  |
| H | 2.11206 | -1.64810 | 1.76063  |
| H | 3.71847 | -1.94663 | 1.07854  |

**Piv-TS6**

|   |          |          |          |
|---|----------|----------|----------|
| C | -2.95868 | -0.85868 | -1.03697 |
| C | -2.22496 | 0.41993  | -1.22972 |
| C | -1.44807 | 0.96713  | -0.15720 |
| O | -0.89910 | 2.12566  | -0.33398 |
| C | -1.77439 | 0.48844  | 1.23104  |
| C | -2.29066 | -0.94286 | 1.20748  |
| O | -3.36462 | -1.06378 | 0.29380  |
| O | 1.21197  | 1.46595  | 0.61237  |
| H | -1.48256 | -1.62862 | 0.93246  |
| H | -2.56279 | 1.15372  | 1.59817  |
| C | 1.19386  | 0.32713  | 0.07516  |
| H | 0.02578  | 2.06932  | 0.21574  |
| O | 0.14393  | -0.22642 | -0.36494 |
| C | 2.52163  | -0.41711 | -0.06960 |
| H | -3.85741 | -0.88616 | -1.65457 |
| H | -2.30471 | -1.68418 | -1.36838 |
| C | 3.24545  | -0.38552 | 1.27850  |
| C | 2.30087  | -1.85576 | -0.52330 |
| C | 3.34420  | 0.34717  | -1.11475 |

|   |          |          |          |
|---|----------|----------|----------|
| H | -2.68255 | -1.22794 | 2.18192  |
| H | -0.90508 | 0.60726  | 1.87699  |
| H | -2.11986 | 0.86021  | -2.21134 |
| H | 1.79391  | -1.89163 | -1.48688 |
| H | 1.69340  | -2.40673 | 0.19596  |
| H | 3.26450  | -2.36011 | -0.61707 |
| H | 2.83773  | 0.35380  | -2.08187 |
| H | 4.31438  | -0.13716 | -1.24136 |
| H | 3.50470  | 1.37741  | -0.79815 |
| H | 4.21971  | -0.86822 | 1.18088  |
| H | 2.67703  | -0.92129 | 2.04161  |
| H | 3.39093  | 0.63991  | 1.61409  |

**Piv-IV**

|   |          |          |          |
|---|----------|----------|----------|
| C | -3.58941 | -0.52509 | -1.03143 |
| C | -2.80624 | 0.73682  | -0.98960 |
| C | -1.94779 | 1.06530  | 0.10758  |
| O | -1.24909 | 2.08075  | 0.08154  |
| C | -1.93411 | 0.10806  | 1.27388  |
| C | -2.39449 | -1.27433 | 0.83512  |
| O | -3.66151 | -1.18195 | 0.20582  |
| O | 1.36492  | 1.40084  | 0.45611  |
| H | -1.65951 | -1.71090 | 0.14939  |
| H | -2.62009 | 0.49816  | 2.03166  |
| C | 1.46356  | 0.18292  | -0.07088 |
| H | 0.43049  | 1.71254  | 0.41043  |
| O | 0.50889  | -0.44291 | -0.46837 |
| C | 2.89839  | -0.32190 | -0.10959 |
| H | -4.61557 | -0.32968 | -1.35405 |
| H | -3.13749 | -1.18501 | -1.79257 |
| C | 3.46156  | -0.31555 | 1.31632  |

|   |          |          |          |
|---|----------|----------|----------|
| C | 2.92085  | -1.73370 | -0.68254 |
| C | 3.71936  | 0.62465  | -0.99402 |
| H | -2.52079 | -1.93888 | 1.68754  |
| H | -0.93175 | 0.08619  | 1.70036  |
| H | -2.80368 | 1.39669  | -1.84726 |
| H | 4.48703  | -0.68888 | 1.30076  |
| H | 2.87564  | -0.96289 | 1.97183  |
| H | 3.46221  | 0.69071  | 1.73283  |
| H | 3.32371  | 0.65062  | -2.01098 |
| H | 4.75115  | 0.27163  | -1.03955 |
| H | 3.71370  | 1.63741  | -0.59326 |
| H | 2.50715  | -1.75332 | -1.69045 |
| H | 2.33257  | -2.41524 | -0.06802 |
| H | 3.94955  | -2.09607 | -0.71852 |

**Piv-VI**

|   |          |          |          |
|---|----------|----------|----------|
| C | -0.93522 | 0.19021  | 0.00006  |
| O | -1.50405 | 1.24603  | 0.00010  |
| O | -1.60938 | -0.97877 | 0.00003  |
| H | -2.55201 | -0.75994 | -0.00005 |
| C | 0.56985  | -0.01215 | 0.00003  |
| C | 0.95759  | -0.80569 | 1.25392  |
| C | 0.95782  | -0.80196 | -1.25616 |
| C | 1.25046  | 1.35151  | 0.00206  |
| H | 0.96764  | 1.93110  | -0.87633 |
| H | 2.33324  | 1.21718  | -0.00004 |
| H | 0.97064  | 1.92694  | 0.88417  |
| H | 0.66948  | -0.26417 | -2.16106 |
| H | 0.48313  | -1.78227 | -1.26793 |
| H | 2.04032  | -0.93901 | -1.27336 |

|   |         |          |         |
|---|---------|----------|---------|
| H | 0.48618 | -1.78764 | 1.26059 |
| H | 0.66532 | -0.27268 | 2.16038 |
| H | 2.04052 | -0.93910 | 1.27309 |

#### **Piv-VIII**

|   |          |          |          |
|---|----------|----------|----------|
| C | -1.05639 | 0.02971  | 0.00053  |
| O | -1.60007 | 1.15030  | 0.00054  |
| O | -1.58786 | -1.09952 | 0.00029  |
| C | 0.52053  | 0.01077  | 0.00018  |
| C | 0.98814  | -0.74712 | 1.24249  |
| C | 0.98650  | -0.74026 | -1.24704 |
| C | 1.09631  | 1.42079  | 0.00342  |
| H | 0.67409  | -0.21246 | -2.15235 |
| H | 0.53843  | -1.73409 | -1.26264 |
| H | 2.07936  | -0.83446 | -1.26622 |
| H | 0.53997  | -1.74096 | 1.25319  |
| H | 0.67709  | -0.22442 | 2.15122  |
| H | 2.08102  | -0.84148 | 1.25961  |
| H | 0.75233  | 1.97569  | -0.87020 |
| H | 2.19329  | 1.39270  | 0.00045  |
| H | 0.75731  | 1.96990  | 0.88270  |

### **7.3 Benzoyl**

#### **Bz-I**

|   |            |            |            |
|---|------------|------------|------------|
| O | -2.3791890 | -1.1910630 | -0.4815990 |
| C | -1.0519830 | -1.5169220 | -0.1779890 |
| C | -0.1040060 | -0.3308520 | -0.3712240 |



|   |            |            |            |
|---|------------|------------|------------|
| C | -0.6727270 | 0.9195390  | 0.2078530  |
| C | -2.1542530 | 1.1023830  | 0.2277290  |
| C | -2.8796780 | -0.2179820 | 0.4159780  |
| O | 1.1163160  | -0.7756560 | 0.2874260  |
| C | 2.2633080  | -0.1756580 | -0.0078310 |
| O | 0.0011250  | 2.0806930  | 0.0343540  |
| O | 2.3392770  | 0.8307170  | -0.6776570 |
| H | -2.7608930 | -0.5795210 | 1.4455240  |
| H | -2.4697210 | 1.5537690  | -0.7228850 |
| H | 0.9056530  | 1.8905470  | -0.2699230 |
| H | -0.7539870 | -2.3381590 | -0.8278780 |
| H | -0.9657920 | -1.8461900 | 0.8658140  |
| H | -3.9423910 | -0.1153140 | 0.2041680  |
| H | -2.4263700 | 1.8093300  | 1.0158390  |
| H | 0.1434350  | -0.1935120 | -1.4320200 |
| C | 3.4491070  | -0.8622030 | 0.5694040  |
| C | 4.7012540  | -0.2988520 | 0.3427270  |
| C | 3.3295880  | -2.0313690 | 1.3148390  |
| C | 5.8334980  | -0.9056850 | 0.8598380  |
| H | 4.7660850  | 0.6107920  | -0.2390710 |
| C | 4.4655460  | -2.6342390 | 1.8316290  |
| H | 2.3518680  | -2.4590870 | 1.4862430  |
| C | 5.7152680  | -2.0728710 | 1.6040960  |
| H | 6.8080660  | -0.4699990 | 0.6844120  |
| H | 4.3768210  | -3.5428380 | 2.4121650  |
| H | 6.6004580  | -2.5465740 | 2.0087070  |

**Bz-TS1a**

|   |           |            |            |
|---|-----------|------------|------------|
| O | 0.9262620 | 0.3422170  | 1.0145690  |
| C | 1.7553380 | -0.2302530 | 0.2602360  |
| O | 1.2143090 | -0.8970760 | -0.7884140 |

|   |            |            |            |
|---|------------|------------|------------|
| C | -0.1506080 | -0.4562210 | -0.9801840 |
| C | -0.2812780 | 0.9045690  | -0.3882580 |
| C | -1.5051960 | 1.3338530  | 0.3405070  |
| C | -2.2184250 | 0.1303630  | 0.9446770  |
| O | -2.3453500 | -0.8970480 | -0.0152410 |
| C | -1.0927670 | -1.4637460 | -0.3124430 |
| O | 0.4202240  | 1.8221170  | -1.0865150 |
| H | -1.6597310 | -0.2376230 | 1.8119190  |
| H | -2.1745390 | 1.8379430  | -0.3667230 |
| H | 0.4062830  | 2.6711440  | -0.6290910 |
| H | -1.2667880 | -2.3108080 | -0.9730630 |
| H | -0.6076810 | -1.8222070 | 0.6021100  |
| H | -3.2253320 | 0.3983900  | 1.2591100  |
| H | -1.2407950 | 2.0534450  | 1.1228420  |
| H | -0.2876820 | -0.4147100 | -2.0613180 |
| C | 3.1879570  | -0.0839980 | 0.2986110  |
| C | 3.7775800  | 0.6539450  | 1.3367460  |
| C | 4.0104320  | -0.7009090 | -0.6559550 |
| C | 5.1508370  | 0.7876740  | 1.3997310  |
| H | 3.1378070  | 1.1116580  | 2.0795570  |
| C | 5.3843610  | -0.5637660 | -0.5770610 |
| H | 3.5577970  | -1.2756770 | -1.4520320 |
| C | 5.9633820  | 0.1799700  | 0.4458590  |
| H | 5.5967400  | 1.3647750  | 2.1997730  |
| H | 6.0120330  | -1.0388090 | -1.3202220 |
| H | 7.0389740  | 0.2816460  | 0.5030790  |

**Bz-II**

|   |          |          |          |
|---|----------|----------|----------|
| O | -0.47599 | -0.91895 | -0.05488 |
| C | 0.39774  | 0.06365  | 0.29615  |
| O | -0.23594 | 1.09479  | 0.90283  |

|   |          |          |          |
|---|----------|----------|----------|
| C | -1.63573 | 0.87522  | 0.73861  |
| C | -1.70631 | -0.64579 | 0.61721  |
| C | -2.86266 | -1.18100 | -0.20289 |
| C | -3.12595 | -0.31527 | -1.42444 |
| O | -3.29918 | 1.03176  | -1.03463 |
| C | -2.10025 | 1.57455  | -0.54242 |
| O | -1.67098 | -1.17228 | 1.90648  |
| H | -2.29701 | -0.39305 | -2.13839 |
| H | -3.74490 | -1.17549 | 0.43829  |
| H | -1.56039 | -2.12852 | 1.84803  |
| H | -2.27034 | 2.63257  | -0.35263 |
| H | -1.30075 | 1.47924  | -1.28961 |
| H | -4.04446 | -0.62014 | -1.92266 |
| H | -2.64657 | -2.21341 | -0.48869 |
| H | -2.15213 | 1.22671  | 1.62830  |
| C | 1.76336  | 0.01590  | 0.05315  |
| C | 2.35653  | -1.12565 | -0.54747 |
| C | 2.59909  | 1.11011  | 0.40028  |
| C | 3.71272  | -1.15566 | -0.78290 |
| H | 1.73116  | -1.96607 | -0.81616 |
| C | 3.95200  | 1.05023  | 0.15333  |
| H | 2.15898  | 1.98396  | 0.86087  |
| C | 4.52690  | -0.07566 | -0.43873 |
| H | 4.15084  | -2.03309 | -1.24198 |
| H | 4.57685  | 1.89188  | 0.42472  |
| H | 5.59086  | -0.11102 | -0.62770 |

**Bz-TS1b**

|   |          |          |          |
|---|----------|----------|----------|
| O | -0.57358 | -0.32390 | -1.04832 |
| C | -1.94848 | -0.53683 | -0.58757 |

|   |          |          |          |
|---|----------|----------|----------|
| C | -1.85500 | -0.74453 | 0.89713  |
| O | -0.22149 | -1.62121 | 0.68977  |
| C | 0.29070  | -0.84291 | -0.15990 |
| C | -2.71898 | 0.71855  | -0.94769 |
| C | -2.27094 | 1.87694  | -0.06710 |
| O | -2.42427 | 1.56504  | 1.30207  |
| C | -1.58260 | 0.49262  | 1.69525  |
| O | -2.48900 | -1.61837 | -1.25981 |
| H | -1.22258 | 2.12671  | -0.27705 |
| H | -3.77917 | 0.51793  | -0.79124 |
| H | -2.01733 | -2.41371 | -0.98205 |
| H | -1.75646 | 0.32572  | 2.75547  |
| H | -0.53000 | 0.79178  | 1.55761  |
| H | -2.88096 | 2.75900  | -0.25464 |
| H | -2.55689 | 0.93631  | -2.00453 |
| H | -2.46740 | -1.52717 | 1.31976  |
| C | 1.63928  | -0.32572 | -0.12548 |
| C | 2.09055  | 0.57398  | -1.10034 |
| C | 2.51974  | -0.76077 | 0.87457  |
| C | 3.39315  | 1.03826  | -1.05917 |
| H | 1.41191  | 0.89817  | -1.87749 |
| C | 3.81571  | -0.28291 | 0.90845  |
| H | 2.16553  | -1.46803 | 1.61272  |
| C | 4.25959  | 0.61640  | -0.05699 |
| H | 3.73699  | 1.73497  | -1.81265 |
| H | 4.48920  | -0.61485 | 1.68790  |
| H | 5.27744  | 0.98225  | -0.03033 |

**Bz-III**

|   |          |          |          |
|---|----------|----------|----------|
| O | -0.42636 | -0.07985 | -0.50308 |
| C | -1.80175 | -0.62357 | -0.51627 |

|   |          |          |          |
|---|----------|----------|----------|
| C | -2.26696 | -0.78696 | 0.89204  |
| O | 0.35104  | -1.99712 | 0.35811  |
| C | 0.53789  | -0.86555 | -0.02583 |
| C | -2.61482 | 0.44916  | -1.21877 |
| C | -2.76260 | 1.67714  | -0.33199 |
| O | -3.38567 | 1.34886  | 0.89106  |
| C | -2.61003 | 0.44592  | 1.65503  |
| O | -1.83956 | -1.77893 | -1.26818 |
| H | -1.77995 | 2.12910  | -0.14164 |
| H | -3.59776 | 0.02602  | -1.42774 |
| H | -1.31613 | -2.44654 | -0.80231 |
| H | -3.19032 | 0.20538  | 2.54474  |
| H | -1.68793 | 0.95621  | 1.98642  |
| H | -3.39571 | 2.42168  | -0.81202 |
| H | -2.12776 | 0.69481  | -2.16314 |
| H | -2.14194 | -1.73743 | 1.38863  |
| C | 1.87364  | -0.20705 | -0.01339 |
| C | 2.05097  | 1.10253  | -0.44945 |
| C | 2.95794  | -0.94229 | 0.45543  |
| C | 3.31381  | 1.67332  | -0.41443 |
| H | 1.20207  | 1.66364  | -0.81455 |
| C | 4.21787  | -0.36832 | 0.48880  |
| H | 2.79258  | -1.95827 | 0.78826  |
| C | 4.39562  | 0.93931  | 0.05397  |
| H | 3.45505  | 2.69108  | -0.75329 |
| H | 5.06218  | -0.93859 | 0.85281  |
| H | 5.38060  | 1.38747  | 0.07973  |

**Bz-TS2**

|   |          |         |          |
|---|----------|---------|----------|
| C | -2.68023 | 1.61119 | -0.34015 |
| C | -2.20774 | 0.82861 | 0.84759  |

|   |          |          |          |
|---|----------|----------|----------|
| C | -2.19402 | -0.56445 | 0.80131  |
| O | -2.00334 | -1.20318 | 1.95141  |
| C | -2.78526 | -1.29500 | -0.36024 |
| C | -2.81274 | -0.37583 | -1.57368 |
| O | -3.44770 | 0.83826  | -1.23628 |
| O | -0.00750 | 1.22630  | 0.65151  |
| H | -1.78886 | -0.19508 | -1.91834 |
| H | -3.80765 | -1.57891 | -0.09037 |
| C | 0.46129  | 0.13976  | 0.25654  |
| H | -1.84039 | -2.13985 | 1.78312  |
| O | -0.21157 | -0.89512 | 0.01415  |
| H | -3.31860 | 2.43195  | -0.01259 |
| H | -1.80650 | 2.03967  | -0.84616 |
| H | -3.38997 | -0.81935 | -2.38261 |
| H | -2.20665 | -2.19738 | -0.56127 |
| H | -2.05608 | 1.31833  | 1.79622  |
| C | 1.95587  | 0.05775  | 0.04295  |
| C | 2.75367  | 1.16593  | 0.30492  |
| C | 2.53338  | -1.12086 | -0.41535 |
| C | 4.12471  | 1.09422  | 0.11016  |
| H | 2.28307  | 2.07231  | 0.66086  |
| C | 3.90463  | -1.19095 | -0.61078 |
| H | 1.89511  | -1.97103 | -0.61383 |
| C | 4.70090  | -0.08371 | -0.34798 |
| H | 4.74553  | 1.95681  | 0.31525  |
| H | 4.35380  | -2.10867 | -0.96803 |
| H | 5.77134  | -0.13883 | -0.50028 |

**Bz-TS3**

|   |          |         |          |
|---|----------|---------|----------|
| C | -2.52060 | 1.48521 | -0.59682 |
| C | -2.24425 | 0.81626 | 0.70897  |

|   |          |          |          |
|---|----------|----------|----------|
| C | -2.52343 | -0.51102 | 0.87629  |
| O | -2.42218 | -1.04550 | 2.08676  |
| C | -2.91747 | -1.37632 | -0.26980 |
| C | -2.76015 | -0.61596 | -1.58594 |
| O | -3.29345 | 0.68231  | -1.46075 |
| O | -0.27292 | -0.33375 | 0.19192  |
| H | -1.70042 | -0.56983 | -1.85268 |
| H | -3.95434 | -1.69732 | -0.12817 |
| C | 0.59728  | 0.60786  | 0.34377  |
| H | -2.47295 | -2.00769 | 2.04022  |
| O | 0.36372  | 1.76686  | 0.64897  |
| H | -3.09067 | 2.39973  | -0.42477 |
| H | -1.56618 | 1.76691  | -1.05704 |
| H | -3.31224 | -1.11075 | -2.38249 |
| H | -2.27941 | -2.26584 | -0.26711 |
| H | -1.88229 | 1.40085  | 1.54151  |
| C | 2.02400  | 0.16402  | 0.08815  |
| C | 2.33621  | -1.15029 | -0.24095 |
| C | 3.03610  | 1.11173  | 0.19046  |
| C | 3.65562  | -1.51457 | -0.46697 |
| H | 1.54004  | -1.87816 | -0.31610 |
| C | 4.35432  | 0.74653  | -0.03562 |
| H | 2.76606  | 2.12674  | 0.44922  |
| C | 4.66532  | -0.56677 | -0.36470 |
| H | 3.89760  | -2.53820 | -0.72264 |
| H | 5.14097  | 1.48568  | 0.04495  |
| H | 5.69478  | -0.85160 | -0.54113 |

**Bz-TS4**

|   |          |          |         |
|---|----------|----------|---------|
| C | -2.60585 | -0.06109 | 1.64447 |
| C | -2.20508 | -1.05576 | 0.60363 |

|   |          |          |          |
|---|----------|----------|----------|
| C | -2.28948 | -0.69471 | -0.73924 |
| O | -1.75871 | -1.43920 | -1.67171 |
| C | -3.03845 | 0.51153  | -1.17571 |
| C | -3.16323 | 1.49943  | -0.01564 |
| O | -3.57959 | 0.83362  | 1.15991  |
| O | 0.08795  | -1.36967 | 0.26786  |
| H | -2.19982 | 1.98826  | 0.14445  |
| H | -4.03120 | 0.19030  | -1.50752 |
| C | 0.50578  | -0.19851 | -0.01456 |
| H | -1.03332 | -1.94559 | -1.24500 |
| O | -0.21721 | 0.76018  | -0.31329 |
| H | -3.03997 | -0.56515 | 2.50690  |
| H | -1.70377 | 0.47568  | 1.97060  |
| H | -3.92437 | 2.24559  | -0.23393 |
| H | -2.51714 | 0.95281  | -2.02464 |
| H | -1.97123 | -2.07094 | 0.88073  |
| C | 2.00387  | 0.00026  | 0.02105  |
| C | 2.53834  | 1.23436  | -0.33241 |
| C | 2.84765  | -1.03614 | 0.40461  |
| C | 3.91055  | 1.43076  | -0.30323 |
| H | 1.86171  | 2.02551  | -0.62613 |
| C | 4.22032  | -0.83839 | 0.43520  |
| H | 2.41264  | -1.98801 | 0.67724  |
| C | 4.75243  | 0.39450  | 0.08085  |
| H | 4.32560  | 2.39168  | -0.57898 |
| H | 4.87641  | -1.64524 | 0.73552  |
| H | 5.82387  | 0.54822  | 0.10441  |

**Bz-TS5**

|   |         |          |         |
|---|---------|----------|---------|
| O | 3.76902 | -1.40365 | 0.38603 |
| C | 2.52958 | -1.29133 | 1.04680 |



|   |          |          |          |
|---|----------|----------|----------|
| C | 1.88192  | 0.05697  | 0.86223  |
| C | 2.41016  | 0.94843  | -0.08257 |
| C | 3.52404  | 0.54850  | -0.99054 |
| C | 3.69602  | -0.96480 | -0.95235 |
| O | 0.15397  | -0.45490 | 0.10599  |
| C | -0.71443 | 0.47198  | 0.22693  |
| O | 1.88540  | 2.12906  | -0.25374 |
| O | -0.45329 | 1.66137  | 0.49101  |
| H | 2.85683  | -1.45366 | -1.46324 |
| H | 4.44606  | 1.03824  | -0.66308 |
| H | 0.92868  | 2.10075  | 0.14236  |
| H | 2.72710  | -1.46484 | 2.10417  |
| H | 1.83368  | -2.06210 | 0.69572  |
| H | 4.62244  | -1.26682 | -1.43718 |
| H | 3.30376  | 0.90547  | -1.99838 |
| H | 1.36575  | 0.48646  | 1.71038  |
| C | -2.14665 | 0.06871  | 0.04149  |
| C | -3.13947 | 1.04009  | 0.11498  |
| C | -2.48563 | -1.25784 | -0.20349 |
| C | -4.46826 | 0.68423  | -0.05469 |
| H | -2.85149 | 2.06497  | 0.30568  |
| C | -3.81535 | -1.61119 | -0.37323 |
| H | -1.70070 | -1.99961 | -0.25925 |
| C | -4.80638 | -0.64080 | -0.29875 |
| H | -5.24144 | 1.43918  | 0.00288  |
| H | -4.08030 | -2.64298 | -0.56371 |
| H | -5.84445 | -0.91783 | -0.43147 |

**Bz-TS6**

|   |         |          |         |
|---|---------|----------|---------|
| C | 2.79976 | -0.67625 | 1.55571 |
| C | 2.26991 | 0.61613  | 1.04319 |

|   |          |          |          |
|---|----------|----------|----------|
| C | 2.11515  | 0.81566  | -0.36268 |
| O | 1.75143  | 1.96471  | -0.84670 |
| C | 2.84165  | -0.10878 | -1.28445 |
| C | 3.03979  | -1.46970 | -0.63175 |
| O | 3.64566  | -1.32396 | 0.63783  |
| O | -0.41363 | 1.86525  | 0.28805  |
| H | 2.07486  | -1.97798 | -0.53338 |
| H | 3.81107  | 0.34985  | -1.50038 |
| C | -0.59649 | 0.66624  | -0.02269 |
| H | 0.89375  | 2.21889  | -0.31160 |
| O | 0.33148  | -0.13997 | -0.35146 |
| H | 3.37731  | -0.51801 | 2.46748  |
| H | 1.94541  | -1.32524 | 1.81269  |
| H | 3.70825  | -2.08919 | -1.22619 |
| H | 2.27964  | -0.17788 | -2.21471 |
| H | 1.84507  | 1.34249  | 1.72269  |
| C | -1.99424 | 0.12390  | -0.01139 |
| C | -3.05172 | 0.97209  | 0.29931  |
| C | -2.23661 | -1.21324 | -0.30707 |
| C | -4.34863 | 0.48279  | 0.31435  |
| H | -2.83794 | 2.00811  | 0.52484  |
| C | -3.53435 | -1.70069 | -0.29150 |
| H | -1.40146 | -1.85683 | -0.54814 |
| C | -4.59008 | -0.85300 | 0.01913  |
| H | -5.17248 | 1.14193  | 0.55506  |
| H | -3.72456 | -2.74090 | -0.52167 |
| H | -5.60323 | -1.23431 | 0.03059  |

**Bz-IV**

|   |          |          |          |
|---|----------|----------|----------|
| C | -3.71141 | -1.63282 | -0.10773 |
| C | -2.57617 | -0.67669 | -0.06330 |

|   |          |          |          |
|---|----------|----------|----------|
| C | -2.78358 | 0.73634  | -0.03407 |
| O | -1.84173 | 1.53507  | -0.02008 |
| C | -4.21144 | 1.23041  | -0.01757 |
| C | -5.16099 | 0.12440  | 0.41970  |
| O | -4.95463 | -1.03094 | -0.36714 |
| O | 0.84951  | 1.28051  | -0.04739 |
| H | -5.00878 | -0.11518 | 1.48090  |
| H | -4.46544 | 1.55344  | -1.03057 |
| C | 1.31995  | 0.04613  | 0.01880  |
| H | -0.14009 | 1.27290  | -0.03750 |
| O | 0.61646  | -0.93716 | 0.07932  |
| H | -3.54603 | -2.37887 | -0.88930 |
| H | -3.74351 | -2.18297 | 0.84878  |
| H | -6.20043 | 0.41616  | 0.28261  |
| H | -4.26878 | 2.10374  | 0.63272  |
| H | -1.55643 | -1.04297 | -0.01740 |
| C | 2.80983  | -0.02303 | 0.01170  |
| C | 3.41254  | -1.27490 | 0.07635  |
| C | 3.59047  | 1.12634  | -0.05769 |
| C | 4.79385  | -1.37815 | 0.07156  |
| H | 2.78135  | -2.15196 | 0.12939  |
| C | 4.97314  | 1.01964  | -0.06226 |
| H | 3.10864  | 2.09282  | -0.10749 |
| C | 5.57416  | -0.23044 | 0.00223  |
| H | 5.26417  | -2.35139 | 0.12160  |
| H | 5.58277  | 1.91202  | -0.11614 |
| H | 6.65372  | -0.31106 | -0.00159 |

**Bz-VI**

|   |         |         |          |
|---|---------|---------|----------|
| C | 1.69762 | 0.12277 | -0.00001 |
| O | 2.31972 | 1.14981 | -0.00005 |

|   |          |          |          |
|---|----------|----------|----------|
| O | 2.30151  | -1.08061 | 0.00005  |
| H | 3.25434  | -0.91308 | 0.00004  |
| C | 0.21423  | 0.03017  | 0.00000  |
| C | -0.51124 | 1.21739  | 0.00002  |
| C | -0.44392 | -1.19568 | -0.00002 |
| C | -1.89538 | 1.17855  | 0.00002  |
| H | 0.02743  | 2.15567  | 0.00003  |
| C | -1.83004 | -1.22970 | -0.00002 |
| H | 0.13055  | -2.11141 | -0.00004 |
| C | -2.55421 | -0.04503 | 0.00000  |
| H | -2.46235 | 2.09999  | 0.00004  |
| H | -2.34588 | -2.18074 | -0.00004 |
| H | -3.63628 | -0.07483 | 0.00000  |

**Bz-VIII**

|   |          |          |         |
|---|----------|----------|---------|
| C | -0.00005 | 1.82632  | 0.00000 |
| O | 1.12699  | 2.35385  | 0.00000 |
| O | -1.12714 | 2.35374  | 0.00000 |
| C | 0.00000  | 0.27564  | 0.00000 |
| C | -1.19653 | -0.43366 | 0.00000 |
| C | 1.19656  | -0.43359 | 0.00000 |
| C | -1.20089 | -1.82310 | 0.00000 |
| H | -2.11327 | 0.14308  | 0.00000 |
| C | 1.20100  | -1.82303 | 0.00000 |
| H | 2.11327  | 0.14320  | 0.00000 |
| C | 0.00008  | -2.52363 | 0.00000 |
| H | -2.14068 | -2.36456 | 0.00000 |
| H | 2.14082  | -2.36443 | 0.00000 |
| H | 0.00010  | -3.60778 | 0.00000 |

#### 7.4 Chloromethyl

##### ClAc-I

|    |          |          |          |
|----|----------|----------|----------|
| O  | -3.17533 | -1.19967 | -0.44681 |
| C  | -1.82725 | -1.50886 | -0.23555 |
| C  | -0.91572 | -0.29501 | -0.43573 |
| C  | -1.47879 | 0.92606  | 0.20327  |
| C  | -2.95848 | 1.06945  | 0.33774  |
| C  | -3.63943 | -0.27532 | 0.51941  |
| O  | 0.34707  | -0.73279 | 0.16034  |
| C  | 1.46266  | -0.08857 | -0.15266 |
| C  | 2.64836  | -0.84356 | 0.41056  |
| O  | -0.85042 | 2.11009  | 0.01501  |
| O  | 1.52013  | 0.92992  | -0.78666 |
| H  | -3.44675 | -0.67371 | 1.52379  |
| H  | -3.35041 | 1.55253  | -0.56737 |
| H  | 0.04344  | 1.96144  | -0.33562 |
| H  | -1.55295 | -2.29712 | -0.93475 |
| H  | -1.67155 | -1.87746 | 0.78652  |
| H  | 2.69628  | -1.82022 | -0.06709 |
| Cl | 4.17202  | -0.00244 | 0.15575  |
| H  | 2.49288  | -0.99116 | 1.47699  |
| H  | -4.71549 | -0.19125 | 0.37982  |
| H  | -3.18871 | 1.73616  | 1.17289  |
| H  | -0.71078 | -0.12327 | -1.50029 |

##### ClAc-TS1a

|   |          |          |          |
|---|----------|----------|----------|
| O | 0.19022  | -0.03922 | 1.22560  |
| C | 0.94803  | -0.78242 | 0.55709  |
| O | 0.43862  | -1.25867 | -0.59874 |
| C | -0.77184 | -0.52725 | -0.92925 |

|    |          |          |          |
|----|----------|----------|----------|
| C  | -0.69862 | 0.80983  | -0.27651 |
| C  | -1.89185 | 1.44851  | 0.34568  |
| C  | -2.89958 | 0.39483  | 0.78613  |
| O  | -3.11452 | -0.54029 | -0.24990 |
| C  | -1.97692 | -1.34244 | -0.44583 |
| O  | 0.23062  | 1.59506  | -0.85628 |
| C  | 2.40948  | -0.88908 | 0.72457  |
| H  | -2.53618 | -0.11989 | 1.68220  |
| H  | -2.35488 | 2.10915  | -0.39624 |
| H  | 0.37842  | 2.39148  | -0.33238 |
| H  | -2.23616 | -2.10180 | -1.18094 |
| H  | -1.69380 | -1.83907 | 0.48918  |
| H  | 2.67780  | -0.75719 | 1.76660  |
| H  | 2.77909  | -1.83308 | 0.33735  |
| Cl | 3.32397  | 0.40752  | -0.19370 |
| H  | -3.86233 | 0.85198  | 1.00668  |
| H  | -1.58432 | 2.06440  | 1.19717  |
| H  | -0.74689 | -0.42077 | -2.01361 |

#### ClAc-II

|   |          |          |          |
|---|----------|----------|----------|
| O | -0.11638 | 0.87000  | -0.84550 |
| C | 1.16629  | 0.82936  | -0.22016 |
| C | 0.80354  | 0.26454  | 1.15349  |
| O | -0.51228 | 0.78524  | 1.35992  |
| C | -1.02848 | 1.09153  | 0.14219  |
| C | 2.10452  | -0.02269 | -1.05161 |
| C | 1.79869  | -1.50322 | -0.89182 |
| O | 1.81383  | -1.84806 | 0.47792  |
| C | 0.72565  | -1.26567 | 1.15234  |
| O | 1.64488  | 2.12497  | -0.03027 |
| C | -2.42940 | 0.86225  | -0.13629 |
| H | 0.82148  | -1.74483 | -1.32746 |

|    |          |          |          |
|----|----------|----------|----------|
| H  | 3.11864  | 0.17310  | -0.70109 |
| H  | 1.77635  | 2.53517  | -0.89303 |
| H  | 0.73211  | -1.64081 | 2.17400  |
| H  | -0.22029 | -1.55720 | 0.67948  |
| H  | -3.05031 | 1.16685  | 0.69843  |
| H  | -2.73423 | 1.33880  | -1.06104 |
| Cl | -2.82243 | -0.94718 | -0.38833 |
| H  | 2.56002  | -2.10880 | -1.38032 |
| H  | 2.02978  | 0.28826  | -2.09666 |
| H  | 1.46247  | 0.65774  | 1.92388  |

**ClAc-TS1b**

|    |          |          |          |
|----|----------|----------|----------|
| O  | 0.07872  | -0.93583 | -0.84646 |
| C  | -1.26997 | -0.70610 | -0.31586 |
| C  | -1.11281 | -0.35003 | 1.13040  |
| O  | 0.42497  | -1.38760 | 1.28247  |
| C  | 0.93233  | -1.17773 | 0.15765  |
| C  | -1.85589 | 0.42645  | -1.14723 |
| C  | -1.23942 | 1.76070  | -0.75025 |
| O  | -1.42810 | 1.99758  | 0.62835  |
| C  | -0.70342 | 1.06526  | 1.41537  |
| O  | -1.99180 | -1.88568 | -0.41245 |
| C  | 2.36084  | -0.89458 | -0.09355 |
| H  | -0.16919 | 1.77096  | -0.99154 |
| H  | -2.93059 | 0.45136  | -0.96205 |
| H  | -2.10013 | -2.10622 | -1.34468 |
| H  | -0.88757 | 1.31795  | 2.45679  |
| H  | 0.37047  | 1.18878  | 1.21320  |
| H  | 2.95131  | -1.20295 | 0.76164  |
| H  | 2.70058  | -1.38375 | -1.00176 |
| Cl | 2.69989  | 0.88148  | -0.35633 |

|   |          |          |          |
|---|----------|----------|----------|
| H | -1.72476 | 2.57967  | -1.27882 |
| H | -1.68384 | 0.21620  | -2.20629 |
| H | -1.76451 | -0.86875 | 1.81654  |

**ClAc-III**

|    |          |          |          |
|----|----------|----------|----------|
| C  | 2.11856  | -1.08035 | 1.26211  |
| C  | 1.42736  | 0.23955  | 1.23828  |
| C  | 1.07854  | 0.82046  | -0.08934 |
| O  | 0.78950  | 2.16697  | -0.06800 |
| C  | 2.18861  | 0.56777  | -1.09274 |
| C  | 2.67678  | -0.87073 | -1.00278 |
| O  | 3.14571  | -1.16524 | 0.29543  |
| O  | -0.08355 | 0.07458  | -0.64456 |
| H  | 1.87135  | -1.56451 | -1.27708 |
| H  | 3.00489  | 1.24808  | -0.84845 |
| C  | -1.24987 | 0.21898  | -0.02096 |
| H  | 0.10770  | 2.31671  | 0.60170  |
| O  | -1.43591 | 0.89683  | 0.95105  |
| C  | -2.30318 | -0.59854 | -0.74272 |
| H  | 2.58048  | -1.25957 | 2.23205  |
| H  | 1.39097  | -1.89311 | 1.08645  |
| Cl | -3.87394 | -0.52890 | 0.04767  |
| H  | -2.39863 | -0.22008 | -1.75850 |
| H  | -1.97377 | -1.63409 | -0.79225 |
| H  | 3.51433  | -1.03286 | -1.67915 |
| H  | 1.81931  | 0.80339  | -2.09130 |
| H  | 0.99354  | 0.65930  | 2.13383  |

**ClAc-TS2**

|   |          |          |          |
|---|----------|----------|----------|
| C | -1.67264 | -1.62273 | -0.70363 |
|---|----------|----------|----------|



|    |          |          |          |
|----|----------|----------|----------|
| C  | -1.26058 | -0.27571 | -1.21235 |
| C  | -1.54437 | 0.86619  | -0.46477 |
| O  | -1.36593 | 2.03735  | -1.06149 |
| C  | -2.37540 | 0.78310  | 0.77306  |
| C  | -2.33193 | -0.63854 | 1.31760  |
| O  | -2.66618 | -1.55023 | 0.29423  |
| O  | 0.97322  | -0.45206 | -0.81905 |
| H  | -1.33199 | -0.84793 | 1.71227  |
| H  | -3.40419 | 1.04161  | 0.50127  |
| C  | 1.14804  | 0.29295  | 0.15115  |
| H  | -1.44619 | 2.75228  | -0.41728 |
| O  | 0.27093  | 0.95269  | 0.76435  |
| C  | 2.55637  | 0.49062  | 0.72835  |
| H  | -2.09176 | -2.21311 | -1.51866 |
| H  | -0.78111 | -2.14225 | -0.33141 |
| H  | 2.52945  | 0.24603  | 1.78671  |
| Cl | 3.81589  | -0.48359 | -0.04187 |
| H  | 2.81922  | 1.53995  | 0.62015  |
| H  | -3.06515 | -0.77124 | 2.11057  |
| H  | -2.01106 | 1.50006  | 1.50977  |
| H  | -0.90062 | -0.16159 | -2.22243 |

### ClAc-TS3

|   |          |          |          |
|---|----------|----------|----------|
| C | -1.55714 | -1.45367 | -0.86018 |
| C | -1.34932 | 0.00036  | -1.12723 |
| C | -1.93669 | 0.94002  | -0.32510 |
| O | -1.87364 | 2.21731  | -0.67533 |
| C | -2.62071 | 0.56506  | 0.94317  |
| C | -2.38283 | -0.91188 | 1.25534  |
| O | -2.56875 | -1.68675 | 0.09356  |
| O | 0.24912  | 0.51843  | 0.49651  |

|    |          |          |          |
|----|----------|----------|----------|
| H  | -1.36814 | -1.04113 | 1.64283  |
| H  | -3.69067 | 0.77218  | 0.84040  |
| C  | 1.31946  | 0.11617  | -0.09988 |
| H  | -2.18223 | 2.78456  | 0.04153  |
| O  | 1.41465  | -0.41456 | -1.18457 |
| C  | 2.54036  | 0.41057  | 0.79055  |
| H  | -1.87075 | -1.95114 | -1.77950 |
| H  | -0.60293 | -1.89602 | -0.55042 |
| H  | 2.62685  | 1.48742  | 0.91202  |
| H  | 2.38601  | -0.03977 | 1.76723  |
| Cl | 4.05692  | -0.20138 | 0.12250  |
| H  | -3.09905 | -1.26766 | 1.99312  |
| H  | -2.22551 | 1.19243  | 1.74846  |
| H  | -0.79128 | 0.30742  | -1.99941 |

#### ClAc-TS4

|   |          |          |          |
|---|----------|----------|----------|
| C | 1.96634  | -0.44282 | 1.51670  |
| C | 1.61201  | 0.83436  | 0.82541  |
| C | 1.55333  | 0.85034  | -0.56597 |
| O | 1.05862  | 1.87471  | -1.20886 |
| C | 2.09867  | -0.26220 | -1.38458 |
| C | 2.19424  | -1.53638 | -0.54499 |
| O | 2.78243  | -1.25824 | 0.71051  |
| O | -0.65075 | 1.43681  | 0.84061  |
| H | 1.19495  | -1.95674 | -0.41326 |
| H | 3.09211  | 0.03559  | -1.73587 |
| C | -1.21579 | 0.43600  | 0.29020  |
| H | 0.45727  | 2.33830  | -0.58955 |
| O | -0.66372 | -0.47192 | -0.32104 |
| C | -2.73842 | 0.46953  | 0.47243  |
| H | 2.52387  | -0.23911 | 2.42994  |

|    |          |          |          |
|----|----------|----------|----------|
| H  | 1.03374  | -0.95928 | 1.78484  |
| Cl | -3.59314 | -0.87665 | -0.29386 |
| H  | -2.95435 | 0.45313  | 1.53776  |
| H  | -3.11903 | 1.39934  | 0.05786  |
| H  | 2.83862  | -2.26401 | -1.03357 |
| H  | 1.45389  | -0.40042 | -2.25212 |
| H  | 1.52722  | 1.75224  | 1.38472  |

**ClAc-TS5**

|    |          |          |          |
|----|----------|----------|----------|
| O  | -3.37339 | -1.04557 | -0.18968 |
| C  | -2.12071 | -1.38078 | -0.73944 |
| C  | -1.18365 | -0.20401 | -0.83221 |
| C  | -1.52300 | 0.99467  | -0.19041 |
| C  | -2.72759 | 1.09589  | 0.68207  |
| C  | -3.24619 | -0.30089 | 1.00121  |
| O  | 0.35256  | -0.86376 | 0.20029  |
| C  | 1.40948  | -0.19628 | -0.05604 |
| C  | 2.66671  | -0.91007 | 0.42701  |
| O  | -0.75300 | 2.04515  | -0.27263 |
| O  | 1.46770  | 0.88968  | -0.63593 |
| H  | -2.56250 | -0.80979 | 1.69231  |
| H  | -3.49804 | 1.67120  | 0.15988  |
| H  | 0.17302  | 1.73200  | -0.56941 |
| H  | -2.31647 | -1.77510 | -1.73616 |
| H  | -1.63570 | -2.16565 | -0.14760 |
| H  | 2.75502  | -1.84987 | -0.11336 |
| Cl | 4.15138  | 0.01640  | 0.19529  |
| H  | 2.55390  | -1.13154 | 1.48525  |
| H  | -4.23350 | -0.25763 | 1.45676  |
| H  | -2.46400 | 1.64747  | 1.58648  |
| H  | -0.54643 | -0.13518 | -1.70363 |

**CIAc-TS6**

|    |          |          |          |
|----|----------|----------|----------|
| C  | -3.05552 | -0.58298 | -1.01861 |
| C  | -2.21001 | 0.63809  | -1.07597 |
| C  | -1.29937 | 0.92530  | -0.01443 |
| O  | -0.65118 | 2.04724  | -0.06154 |
| C  | -1.52588 | 0.23197  | 1.29761  |
| C  | -2.18088 | -1.12536 | 1.08654  |
| O  | -3.34596 | -0.98986 | 0.29456  |
| O  | 1.47663  | 1.03445  | 0.57628  |
| H  | -1.47547 | -1.81112 | 0.60684  |
| H  | -2.20454 | 0.87965  | 1.86292  |
| C  | 1.29386  | 0.04767  | -0.15710 |
| H  | 0.26748  | 1.85531  | 0.40030  |
| O  | 0.17608  | -0.34952 | -0.60467 |
| C  | 2.46268  | -0.81685 | -0.61284 |
| H  | -4.00843 | -0.41633 | -1.52290 |
| H  | -2.53045 | -1.38662 | -1.56394 |
| Cl | 4.01444  | -0.36605 | 0.09979  |
| H  | 2.25002  | -1.85244 | -0.36022 |
| H  | 2.54014  | -0.73549 | -1.69494 |
| H  | -2.50136 | -1.55001 | 2.03563  |
| H  | -0.58907 | 0.16290  | 1.84915  |
| H  | -2.14774 | 1.23142  | -1.97746 |

**CIAc-IV**

|   |         |          |         |
|---|---------|----------|---------|
| O | 3.21951 | -1.45579 | 0.28404 |
| C | 2.09375 | -1.31013 | 1.11180 |
| C | 1.50815 | 0.05402  | 1.07906 |
| C | 1.82419 | 0.99392  | 0.04833 |

|    |          |          |          |
|----|----------|----------|----------|
| C  | 2.89994  | 0.59715  | -0.93113 |
| C  | 3.00313  | -0.92132 | -1.00709 |
| O  | -1.38941 | 1.81857  | 0.40811  |
| C  | -1.72699 | 0.59948  | 0.01464  |
| C  | -3.23400 | 0.44717  | 0.08727  |
| O  | 1.22350  | 2.06757  | -0.05579 |
| O  | -0.96037 | -0.25213 | -0.34522 |
| H  | 2.08616  | -1.34315 | -1.43810 |
| H  | 3.85180  | 1.00966  | -0.58577 |
| H  | -0.41013 | 1.96368  | 0.29881  |
| H  | 2.40272  | -1.57595 | 2.12536  |
| H  | 1.30075  | -2.01911 | 0.81748  |
| Cl | -3.77615 | -1.18892 | -0.27691 |
| H  | -3.56981 | 0.72047  | 1.08483  |
| H  | -3.68473 | 1.13563  | -0.62489 |
| H  | 3.84824  | -1.22953 | -1.61939 |
| H  | 2.66791  | 1.04350  | -1.89778 |
| H  | 0.74676  | 0.31908  | 1.80055  |

#### ClAc-VI

|    |          |          |          |
|----|----------|----------|----------|
| C  | -0.85196 | 0.41003  | 0.00000  |
| O  | -0.47335 | 1.53908  | 0.00000  |
| O  | -2.15028 | 0.05453  | 0.00000  |
| H  | -2.67438 | 0.86865  | 0.00000  |
| C  | 0.00000  | -0.84017 | 0.00000  |
| H  | -0.24394 | -1.42915 | 0.88189  |
| H  | -0.24394 | -1.42915 | -0.88189 |
| Cl | 1.72135  | -0.48109 | 0.00000  |

#### ClAc-VIII

|    |          |          |          |
|----|----------|----------|----------|
| C  | 1.05309  | -0.34876 | 0.00000  |
| O  | 0.66056  | -1.51722 | 0.00000  |
| O  | 2.20247  | 0.13514  | 0.00000  |
| C  | 0.00000  | 0.80538  | 0.00000  |
| H  | 0.14962  | 1.41916  | 0.88419  |
| H  | 0.14962  | 1.41916  | -0.88419 |
| Cl | -1.73659 | 0.32227  | 0.00000  |

### *7.5 Trichloromethyl*

#### **Cl<sub>3</sub>Ac-I**

|    |          |          |          |
|----|----------|----------|----------|
| C  | -2.03343 | -1.42575 | 0.05558  |
| C  | -1.55981 | -0.06649 | -0.46301 |
| C  | -2.44997 | 1.02322  | 0.01298  |
| O  | -2.02769 | 2.25772  | -0.37389 |
| C  | -3.91658 | 0.74987  | 0.05484  |
| C  | -4.17811 | -0.66452 | 0.55750  |
| O  | -3.40916 | -1.60007 | -0.16733 |
| O  | -0.23385 | 0.18772  | 0.04707  |
| H  | -3.93445 | -0.73442 | 1.62517  |
| H  | -4.34467 | 0.85596  | -0.95271 |
| C  | 0.77054  | -0.36604 | -0.60865 |
| H  | -2.68107 | 2.92069  | -0.12778 |
| O  | 0.69726  | -1.05754 | -1.57601 |
| C  | 2.11469  | -0.00427 | 0.07800  |
| H  | -1.51069 | -2.22579 | -0.46498 |
| H  | -1.80291 | -1.48057 | 1.12784  |
| Cl | 3.45205  | -0.65597 | -0.84940 |
| Cl | 2.25603  | 1.75481  | 0.18972  |
| Cl | 2.09909  | -0.72066 | 1.69909  |
| H  | -5.22145 | -0.94112 | 0.41768  |

|   |          |          |          |
|---|----------|----------|----------|
| H | -4.42353 | 1.47484  | 0.70025  |
| H | -1.49944 | -0.07759 | -1.55768 |

**Cl<sub>3</sub>Ac-TS1a**

|    |          |          |          |
|----|----------|----------|----------|
| O  | -0.41925 | 0.32225  | 0.99718  |
| C  | 0.35758  | -0.33624 | 0.27746  |
| O  | -0.18488 | -1.01729 | -0.74284 |
| C  | -1.55991 | -0.57488 | -0.93719 |
| C  | -1.69053 | 0.80878  | -0.40146 |
| C  | -2.88800 | 1.24670  | 0.36885  |
| C  | -3.57150 | 0.05736  | 1.03098  |
| O  | -3.72540 | -0.99437 | 0.10198  |
| C  | -2.48269 | -1.56645 | -0.21810 |
| O  | -1.05071 | 1.71008  | -1.16916 |
| C  | 1.83834  | -0.07797 | 0.14414  |
| H  | -2.98217 | -0.28540 | 1.88828  |
| H  | -3.58540 | 1.72661  | -0.32733 |
| H  | -1.07836 | 2.58386  | -0.76099 |
| H  | -2.67305 | -2.42893 | -0.85339 |
| H  | -1.97109 | -1.90437 | 0.69023  |
| Cl | 2.43163  | 0.72301  | 1.59404  |
| Cl | 2.68043  | -1.62390 | -0.08369 |
| Cl | 2.19241  | 0.96309  | -1.28658 |
| H  | -4.56805 | 0.32940  | 1.37306  |
| H  | -2.59648 | 1.98940  | 1.11850  |
| H  | -1.69929 | -0.57731 | -2.01777 |

**Cl<sub>3</sub>Ac-II**

|   |          |          |          |
|---|----------|----------|----------|
| C | -2.37664 | -1.58418 | -0.29371 |
| C | -1.56850 | -0.50989 | -1.02870 |

|    |          |          |          |
|----|----------|----------|----------|
| C  | -1.54788 | 0.81745  | -0.27427 |
| O  | -1.17076 | 1.80567  | -1.17608 |
| C  | -2.81594 | 1.15887  | 0.48167  |
| C  | -3.42376 | -0.07413 | 1.13040  |
| O  | -3.60848 | -1.08845 | 0.16321  |
| O  | -0.18633 | -0.87387 | -1.01835 |
| H  | -2.78065 | -0.44273 | 1.93881  |
| H  | -3.52130 | 1.57041  | -0.24107 |
| C  | 0.32891  | -0.37309 | 0.12817  |
| H  | -0.89929 | 2.59042  | -0.68482 |
| O  | -0.48317 | 0.58123  | 0.66074  |
| C  | 1.79488  | -0.12042 | 0.14926  |
| H  | -2.58262 | -2.42006 | -0.95938 |
| H  | -1.77336 | -1.95009 | 0.54785  |
| Cl | 2.28115  | 0.29173  | 1.79877  |
| Cl | 2.64216  | -1.56713 | -0.39846 |
| Cl | 2.23406  | 1.25552  | -0.93555 |
| H  | -4.40573 | 0.15105  | 1.54221  |
| H  | -2.59028 | 1.92823  | 1.22372  |
| H  | -1.87876 | -0.37352 | -2.06137 |

**Cl<sub>3</sub>Ac-TS1b**

|   |          |          |          |
|---|----------|----------|----------|
| O | 0.43308  | 0.94817  | -0.54613 |
| C | 1.80056  | 1.00234  | 0.00839  |
| C | 1.78445  | 0.19137  | 1.26609  |
| O | -0.00383 | 0.61533  | 1.58858  |
| C | -0.42676 | 0.62201  | 0.41782  |
| C | 2.70653  | 0.41988  | -1.06614 |
| C | 2.56691  | -1.09467 | -1.13127 |
| O | 2.82649  | -1.67030 | 0.13151  |
| C | 1.84588  | -1.29713 | 1.08488  |



|    |          |          |          |
|----|----------|----------|----------|
| O  | 2.09272  | 2.31636  | 0.32347  |
| C  | -1.70092 | -0.03924 | -0.04983 |
| H  | 1.56088  | -1.36826 | -1.47072 |
| H  | 3.73291  | 0.68124  | -0.80503 |
| H  | 2.10374  | 2.83784  | -0.48762 |
| H  | 2.10487  | -1.78995 | 2.01870  |
| H  | 0.86499  | -1.67274 | 0.75787  |
| Cl | -2.67332 | -0.51426 | 1.33043  |
| Cl | -2.59331 | 1.11745  | -1.06254 |
| Cl | -1.35762 | -1.49738 | -1.05912 |
| H  | 3.29467  | -1.51609 | -1.82270 |
| H  | 2.45892  | 0.87683  | -2.02778 |
| H  | 2.24361  | 0.64844  | 2.12917  |

**Cl<sub>3</sub>Ac-III**

|   |          |          |          |
|---|----------|----------|----------|
| C | -2.65689 | -0.87555 | -1.35261 |
| C | -2.17906 | 0.52809  | -1.19910 |
| C | -1.74140 | 0.96435  | 0.15510  |
| O | -1.62601 | 2.32271  | 0.32071  |
| C | -2.64948 | 0.39613  | 1.22826  |
| C | -2.92389 | -1.07826 | 0.96542  |
| O | -3.51870 | -1.26190 | -0.30193 |
| O | -0.41942 | 0.31714  | 0.44512  |
| H | -1.99281 | -1.65595 | 1.03109  |
| H | -3.58318 | 0.95800  | 1.19142  |
| C | 0.59839  | 0.68337  | -0.29707 |
| H | -1.08121 | 2.67465  | -0.39666 |
| O | 0.60460  | 1.53270  | -1.14075 |
| C | 1.85290  | -0.16923 | 0.03747  |
| H | -3.21274 | -0.99738 | -2.28117 |
| H | -1.79428 | -1.56480 | -1.38632 |

|    |          |          |          |
|----|----------|----------|----------|
| Cl | 3.22762  | 0.38713  | -0.89427 |
| Cl | 2.19937  | -0.04348 | 1.76534  |
| Cl | 1.47294  | -1.85036 | -0.38924 |
| H  | -3.62647 | -1.47152 | 1.69791  |
| H  | -2.18100 | 0.54960  | 2.20079  |
| H  | -1.95428 | 1.14295  | -2.05825 |

**Cl<sub>3</sub>Ac-TS2**

|    |          |          |          |
|----|----------|----------|----------|
| C  | -2.50862 | -1.38313 | -0.95501 |
| C  | -2.25576 | 0.05514  | -1.27335 |
| C  | -2.35222 | 1.01560  | -0.26232 |
| O  | -2.27697 | 2.27831  | -0.62534 |
| C  | -2.82219 | 0.64757  | 1.10388  |
| C  | -2.63868 | -0.85025 | 1.32116  |
| O  | -3.22053 | -1.55762 | 0.24680  |
| O  | 0.07240  | -0.10904 | -1.45458 |
| H  | -1.57168 | -1.08090 | 1.40750  |
| H  | -3.88625 | 0.90110  | 1.16525  |
| C  | 0.44261  | 0.30022  | -0.35192 |
| H  | -2.21593 | 2.85188  | 0.15048  |
| O  | -0.21681 | 0.86716  | 0.53368  |
| C  | 1.93700  | -0.02656 | 0.03870  |
| H  | -3.10528 | -1.83836 | -1.74607 |
| H  | -1.54002 | -1.90016 | -0.92097 |
| Cl | 1.84681  | -1.55946 | 0.94732  |
| Cl | 2.95425  | -0.24430 | -1.37955 |
| Cl | 2.62139  | 1.23035  | 1.06937  |
| H  | -3.15012 | -1.17261 | 2.22544  |
| H  | -2.27365 | 1.22623  | 1.84785  |
| H  | -2.11627 | 0.37899  | -2.29227 |

**Cl<sub>3</sub>Ac-TS3**

|    |          |          |          |
|----|----------|----------|----------|
| C  | 2.22202  | -1.34907 | 1.02731  |
| C  | 2.19514  | 0.13058  | 1.21163  |
| C  | 2.67380  | 0.95699  | 0.22211  |
| O  | 2.79304  | 2.24638  | 0.47542  |
| C  | 3.00629  | 0.43584  | -1.13153 |
| C  | 2.58137  | -1.02757 | -1.25594 |
| O  | 2.96958  | -1.73691 | -0.10047 |
| O  | 0.31933  | 0.64872  | -0.04986 |
| H  | 1.49767  | -1.08265 | -1.39458 |
| H  | 4.08399  | 0.54269  | -1.29220 |
| C  | -0.60259 | 0.22053  | 0.70972  |
| H  | 2.98670  | 2.74260  | -0.33010 |
| O  | -0.55845 | -0.11601 | 1.87179  |
| C  | -1.96198 | 0.03718  | -0.07550 |
| H  | 2.69234  | -1.81317 | 1.89634  |
| H  | 1.18986  | -1.71966 | 0.97413  |
| Cl | -2.27244 | 1.40518  | -1.15069 |
| Cl | -1.75410 | -1.44681 | -1.04386 |
| Cl | -3.31172 | -0.16627 | 1.02674  |
| H  | 3.07880  | -1.49918 | -2.10052 |
| H  | 2.48490  | 1.04946  | -1.87293 |
| H  | 1.86391  | 0.54993  | 2.15053  |

**Cl<sub>3</sub>Ac-TS4**

|   |         |          |          |
|---|---------|----------|----------|
| C | 2.89939 | -0.97478 | 1.23485  |
| C | 2.24334 | 0.36775  | 1.21236  |
| C | 2.16171 | 1.05775  | 0.00263  |
| O | 1.43314 | 2.13307  | -0.11858 |
| C | 2.92111 | 0.62470  | -1.19706 |

|    |          |          |          |
|----|----------|----------|----------|
| C  | 3.31637  | -0.84699 | -1.06856 |
| O  | 3.85744  | -1.10014 | 0.21277  |
| O  | -0.09176 | 0.35763  | 1.28079  |
| H  | 2.43897  | -1.47323 | -1.24383 |
| H  | 3.81632  | 1.25104  | -1.27151 |
| C  | -0.44089 | -0.19047 | 0.20457  |
| H  | 0.76882  | 2.14549  | 0.59968  |
| O  | 0.26202  | -0.66189 | -0.67727 |
| C  | -1.99793 | -0.15618 | -0.04290 |
| H  | 3.41879  | -1.12684 | 2.18014  |
| H  | 2.11407  | -1.73821 | 1.14222  |
| Cl | -2.48235 | -1.27735 | -1.30665 |
| Cl | -2.88454 | -0.51465 | 1.43991  |
| Cl | -2.35125 | 1.51362  | -0.56454 |
| H  | 4.09437  | -1.09335 | -1.78761 |
| H  | 2.30374  | 0.80229  | -2.07761 |
| H  | 1.94795  | 0.84504  | 2.13313  |

**Cl<sub>3</sub>Ac-TS5**

|   |          |          |          |
|---|----------|----------|----------|
| O | -3.83021 | -1.31066 | -0.26756 |
| C | -2.56296 | -1.35170 | -0.87872 |
| C | -1.86985 | -0.01085 | -0.88803 |
| C | -2.42414 | 1.04333  | -0.14572 |
| C | -3.57074 | 0.83158  | 0.78041  |
| C | -3.79241 | -0.66225 | 0.98453  |
| O | -0.23638 | -0.44040 | 0.02941  |
| C | 0.66868  | 0.41092  | -0.22088 |
| C | 2.10970  | -0.10449 | 0.10335  |
| O | -1.90292 | 2.24668  | -0.17879 |
| O | 0.54218  | 1.52327  | -0.71533 |
| H | -2.99065 | -1.08381 | 1.60346  |

|    |          |          |          |
|----|----------|----------|----------|
| H  | -4.46628 | 1.28913  | 0.34888  |
| H  | -0.97787 | 2.18270  | -0.55097 |
| H  | -2.72350 | -1.68617 | -1.90303 |
| H  | -1.91176 | -2.07628 | -0.37726 |
| Cl | 2.51182  | -1.27246 | -1.17476 |
| Cl | 3.27293  | 1.21004  | 0.09205  |
| Cl | 2.13051  | -0.90585 | 1.67735  |
| H  | -4.74629 | -0.85319 | 1.47179  |
| H  | -3.36460 | 1.34363  | 1.72255  |
| H  | -1.30957 | 0.25434  | -1.77584 |

**Cl<sub>3</sub>Ac-TS6**

|    |          |          |          |
|----|----------|----------|----------|
| C  | -3.44292 | -0.86813 | -1.00788 |
| C  | -2.89223 | 0.50547  | -1.13962 |
| C  | -2.09101 | 1.04995  | -0.09594 |
| O  | -1.70155 | 2.28474  | -0.22266 |
| C  | -2.16539 | 0.40344  | 1.25475  |
| C  | -2.49746 | -1.07738 | 1.12606  |
| O  | -3.65254 | -1.25077 | 0.32665  |
| O  | 0.61127  | 1.72337  | 0.57455  |
| H  | -1.64839 | -1.61532 | 0.69287  |
| H  | -2.97594 | 0.91554  | 1.78467  |
| C  | 0.61162  | 0.65870  | -0.04952 |
| H  | -0.82672 | 2.36362  | 0.28487  |
| O  | -0.35537 | 0.08738  | -0.61148 |
| C  | 1.94708  | -0.15830 | -0.07419 |
| H  | -4.40106 | -0.94972 | -1.52313 |
| H  | -2.74106 | -1.56027 | -1.50525 |
| Cl | 3.33946  | 0.87325  | 0.21414  |
| Cl | 1.78449  | -1.33371 | 1.25755  |
| Cl | 2.13935  | -1.01642 | -1.60012 |

|   |          |          |          |
|---|----------|----------|----------|
| H | -2.72929 | -1.50299 | 2.09990  |
| H | -1.24252 | 0.57563  | 1.80879  |
| H | -2.94363 | 1.04021  | -2.07779 |

**Cl<sub>3</sub>Ac-IV**

|    |          |          |          |
|----|----------|----------|----------|
| O  | 4.37680  | -1.20989 | 0.18816  |
| C  | 3.12044  | -1.43587 | 0.77260  |
| C  | 2.29881  | -0.20643 | 0.90856  |
| C  | 2.61573  | 0.99997  | 0.20898  |
| C  | 3.89088  | 1.01323  | -0.59403 |
| C  | 4.28970  | -0.40752 | -0.97263 |
| O  | -0.64321 | 1.39213  | 0.53576  |
| C  | -0.86295 | 0.33093  | -0.19630 |
| C  | -2.34269 | -0.12870 | -0.08083 |
| O  | 1.87181  | 1.98664  | 0.24127  |
| O  | -0.06281 | -0.27121 | -0.85432 |
| H  | 3.55858  | -0.83597 | -1.67034 |
| H  | 4.67740  | 1.46117  | 0.01932  |
| H  | 0.32261  | 1.67351  | 0.46600  |
| H  | 3.29598  | -1.89161 | 1.74992  |
| H  | 2.54015  | -2.16358 | 0.17896  |
| Cl | -2.66492 | -1.43867 | -1.20149 |
| Cl | -2.57477 | -0.69680 | 1.58712  |
| Cl | -3.41920 | 1.22990  | -0.41501 |
| H  | 5.27033  | -0.42974 | -1.44343 |
| H  | 3.74184  | 1.64739  | -1.46763 |
| H  | 1.39403  | -0.24163 | 1.50162  |

**Cl<sub>3</sub>Ac-VI**

|   |          |         |         |
|---|----------|---------|---------|
| C | -1.33431 | 0.02877 | 0.00000 |
|---|----------|---------|---------|

|    |          |          |          |
|----|----------|----------|----------|
| O  | -2.01365 | 1.00387  | 0.00000  |
| O  | -1.78099 | -1.22449 | 0.00000  |
| H  | -2.74880 | -1.19341 | 0.00000  |
| C  | 0.21289  | 0.05442  | 0.00000  |
| Cl | 0.78107  | -0.78332 | 1.45220  |
| Cl | 0.78107  | -0.78332 | -1.45220 |
| Cl | 0.78107  | 1.71130  | 0.00000  |

### **Cl<sub>3</sub>Ac-VIII**

|    |          |          |          |
|----|----------|----------|----------|
| C  | -1.49483 | -0.04762 | 0.00000  |
| O  | -2.04349 | 1.04759  | 0.00000  |
| O  | -1.88444 | -1.21093 | 0.00000  |
| C  | 0.14053  | 0.02976  | 0.00000  |
| Cl | 0.77548  | -0.80346 | 1.44729  |
| Cl | 0.77548  | -0.80346 | -1.44729 |
| Cl | 0.77548  | 1.69009  | 0.00000  |

## ***7.6 Trifluoromethyl***

### **F<sub>3</sub>Ac-I**

|   |          |          |          |
|---|----------|----------|----------|
| C | -1.44843 | -1.39497 | 0.19117  |
| C | -0.95475 | -0.06586 | -0.38444 |
| C | -1.85129 | 1.05062  | 0.01014  |
| O | -1.41411 | 2.26006  | -0.43380 |
| C | -3.31987 | 0.78573  | 0.03353  |
| C | -3.60040 | -0.60024 | 0.60057  |
| O | -2.81857 | -1.57376 | -0.05791 |
| O | 0.36195  | 0.21052  | 0.14397  |
| H | -3.38278 | -0.61763 | 1.67593  |
| H | -3.72486 | 0.84292  | -0.98736 |

|   |          |          |          |
|---|----------|----------|----------|
| C | 1.37867  | -0.37724 | -0.45856 |
| H | -2.06707 | 2.93955  | -0.23618 |
| O | 1.34433  | -1.13281 | -1.37941 |
| C | 2.69821  | 0.05732  | 0.21829  |
| H | -0.91765 | -2.22307 | -0.27437 |
| H | -1.24621 | -1.39595 | 1.27040  |
| F | 3.72876  | -0.52741 | -0.36618 |
| F | 2.85515  | 1.37567  | 0.13769  |
| F | 2.69165  | -0.28381 | 1.50629  |
| H | -4.64128 | -0.87987 | 0.44948  |
| H | -3.83676 | 1.54475  | 0.62997  |
| H | -0.86512 | -0.13498 | -1.47508 |

**F<sub>3</sub>Ac-TS1a**

|   |          |          |          |
|---|----------|----------|----------|
| O | 0.13060  | 0.29570  | 1.04075  |
| C | 0.90378  | -0.39640 | 0.34704  |
| O | 0.37062  | -1.08490 | -0.67424 |
| C | -0.98225 | -0.59118 | -0.91996 |
| C | -1.06428 | 0.80723  | -0.41703 |
| C | -2.27003 | 1.32155  | 0.28941  |
| C | -3.02875 | 0.18166  | 0.95742  |
| O | -3.19662 | -0.88857 | 0.05214  |
| C | -1.97044 | -1.52319 | -0.20941 |
| O | -0.33722 | 1.65378  | -1.17032 |
| C | 2.37994  | -0.09397 | 0.19056  |
| H | -2.48517 | -0.16151 | 1.84418  |
| H | -2.91888 | 1.80876  | -0.44746 |
| H | -0.34473 | 2.53962  | -0.78825 |
| H | -2.17783 | -2.39269 | -0.82966 |
| H | -1.50556 | -1.85920 | 0.72425  |
| F | 2.86794  | 0.41486  | 1.31732  |



|   |          |          |          |
|---|----------|----------|----------|
| F | 3.06222  | -1.20025 | -0.10653 |
| F | 2.62235  | 0.79158  | -0.78838 |
| H | -4.02374 | 0.50597  | 1.25559  |
| H | -1.97606 | 2.07344  | 1.02871  |
| H | -1.08738 | -0.61244 | -2.00400 |

**F<sub>3</sub>Ac-II**

|   |          |          |          |
|---|----------|----------|----------|
| C | -1.88154 | -1.54897 | -0.22828 |
| C | -0.98797 | -0.55364 | -0.97537 |
| C | -0.94097 | 0.80893  | -0.28776 |
| O | -0.46529 | 1.72856  | -1.21470 |
| C | -2.22834 | 1.24852  | 0.37900  |
| C | -2.92821 | 0.08132  | 1.05644  |
| O | -3.11060 | -0.97472 | 0.13490  |
| O | 0.37327  | -0.97975 | -0.87937 |
| H | -2.34672 | -0.27100 | 1.91696  |
| H | -2.87505 | 1.65256  | -0.40071 |
| C | 0.86393  | -0.43056 | 0.25826  |
| H | -0.26102 | 2.55513  | -0.76131 |
| O | 0.06042  | 0.57051  | 0.71605  |
| C | 2.33668  | -0.13796 | 0.23613  |
| H | -2.09217 | -2.41044 | -0.85894 |
| H | -1.33990 | -1.89365 | 0.66251  |
| F | 2.75069  | 0.23483  | 1.44666  |
| F | 3.02108  | -1.21601 | -0.13639 |
| F | 2.65236  | 0.85280  | -0.61145 |
| H | -3.91836 | 0.37328  | 1.40122  |
| H | -2.00437 | 2.04470  | 1.09295  |
| H | -1.24335 | -0.45776 | -2.02751 |

**F<sub>3</sub>Ac-TS1b**

|   |          |          |          |
|---|----------|----------|----------|
| O | -0.06398 | 0.88918  | -0.69688 |
| C | 1.29739  | 0.93848  | -0.11100 |
| C | 1.21641  | 0.25080  | 1.21495  |
| O | -0.56990 | 0.74932  | 1.44919  |
| C | -0.95113 | 0.65398  | 0.26758  |
| C | 2.19228  | 0.21725  | -1.10805 |
| C | 1.97895  | -1.28827 | -1.03471 |
| O | 2.19891  | -1.75189 | 0.27991  |
| C | 1.22273  | -1.25025 | 1.17600  |
| O | 1.64068  | 2.26197  | 0.08564  |
| C | -2.15534 | -0.15772 | -0.17257 |
| H | 0.96315  | -1.54609 | -1.36014 |
| H | 3.22639  | 0.45141  | -0.85177 |
| H | 1.69555  | 2.70259  | -0.77036 |
| H | 1.44766  | -1.66140 | 2.15691  |
| H | 0.23272  | -1.61785 | 0.86751  |
| F | -2.99115 | -0.33941 | 0.83789  |
| F | -2.80187 | 0.45927  | -1.16079 |
| F | -1.80271 | -1.37097 | -0.63676 |
| H | 2.69059  | -1.80766 | -1.67413 |
| H | 1.98279  | 0.59441  | -2.11235 |
| H | 1.66935  | 0.77037  | 2.04525  |

**F<sub>3</sub>Ac-III**

|   |         |          |          |
|---|---------|----------|----------|
| C | 2.22948 | -0.72576 | 1.41739  |
| C | 1.63446 | 0.60749  | 1.11637  |
| C | 1.16225 | 0.85988  | -0.27194 |
| O | 0.94952 | 2.17961  | -0.58428 |
| C | 2.10034 | 0.24195  | -1.28974 |
| C | 2.49340 | -1.16688 | -0.86751 |

|   |          |          |          |
|---|----------|----------|----------|
| O | 3.11094  | -1.15718 | 0.40208  |
| O | -0.11999 | 0.09717  | -0.46970 |
| H | 1.61248  | -1.82119 | -0.85242 |
| H | 2.98763  | 0.87418  | -1.33296 |
| C | -1.16230 | 0.50014  | 0.21500  |
| H | 0.39746  | 2.57629  | 0.10361  |
| O | -1.23332 | 1.42703  | 0.97015  |
| C | -2.37009 | -0.42426 | -0.06395 |
| H | 2.80154  | -0.69460 | 2.34362  |
| H | 1.42880  | -1.47591 | 1.54587  |
| F | -3.43781 | -0.00308 | 0.58840  |
| F | -2.64891 | -0.45752 | -1.36367 |
| F | -2.09058 | -1.66590 | 0.33453  |
| H | 3.21956  | -1.58379 | -1.56290 |
| H | 1.61341  | 0.24795  | -2.26521 |
| H | 1.35234  | 1.28714  | 1.90736  |

**F<sub>3</sub>Ac-TS2**

|   |          |          |          |
|---|----------|----------|----------|
| C | -2.17467 | -1.40472 | -0.81560 |
| C | -1.64409 | -0.07362 | -1.23984 |
| C | -1.64767 | 0.99486  | -0.34096 |
| O | -1.32603 | 2.17997  | -0.81721 |
| C | -2.27264 | 0.86329  | 1.00593  |
| C | -2.36273 | -0.61108 | 1.38132  |
| O | -2.98222 | -1.32860 | 0.33506  |
| O | 0.64239  | -0.60872 | -1.21239 |
| H | -1.35847 | -0.99902 | 1.57900  |
| H | -3.27944 | 1.29080  | 0.94675  |
| C | 1.03080  | -0.03844 | -0.18900 |
| H | -1.21545 | 2.81672  | -0.09815 |
| O | 0.37874  | 0.61868  | 0.64236  |

|   |          |          |          |
|---|----------|----------|----------|
| C | 2.55094  | -0.14104 | 0.13970  |
| H | -2.79424 | -1.82470 | -1.60874 |
| H | -1.32213 | -2.07821 | -0.65963 |
| F | 2.72875  | -0.71063 | 1.33485  |
| F | 3.21994  | -0.85634 | -0.75477 |
| F | 3.09913  | 1.07619  | 0.18370  |
| H | -2.98131 | -0.74610 | 2.26576  |
| H | -1.68900 | 1.42388  | 1.73685  |
| H | -1.37301 | 0.10752  | -2.26772 |

### **F<sub>3</sub>Ac-TS3**

|   |          |          |          |
|---|----------|----------|----------|
| C | -1.84057 | -1.41460 | -0.85837 |
| C | -1.56878 | 0.02218  | -1.15295 |
| C | -1.99514 | 0.99857  | -0.28413 |
| O | -1.89253 | 2.26242  | -0.65065 |
| C | -2.51585 | 0.66033  | 1.06814  |
| C | -2.32585 | -0.83012 | 1.35008  |
| O | -2.72231 | -1.58364 | 0.22616  |
| O | 0.26113  | 0.38477  | 0.21699  |
| H | -1.27734 | -1.02404 | 1.59250  |
| H | -3.57559 | 0.93134  | 1.11324  |
| C | 1.19937  | -0.09049 | -0.49928 |
| H | -2.07063 | 2.85540  | 0.09044  |
| O | 1.16423  | -0.59375 | -1.60169 |
| C | 2.56905  | 0.00157  | 0.24198  |
| H | -2.31299 | -1.87835 | -1.72639 |
| H | -0.88557 | -1.92613 | -0.68742 |
| F | 2.83180  | 1.25692  | 0.61376  |
| F | 2.54716  | -0.75198 | 1.34766  |
| F | 3.56998  | -0.41791 | -0.51689 |
| H | -2.95327 | -1.14479 | 2.18102  |

|   |          |         |          |
|---|----------|---------|----------|
| H | -1.97557 | 1.26153 | 1.80612  |
| H | -1.10698 | 0.29871 | -2.08972 |

**F<sub>3</sub>Ac-TS4**

|   |          |          |          |
|---|----------|----------|----------|
| C | 2.09608  | -1.07332 | 1.20255  |
| C | 1.58569  | 0.33196  | 1.20370  |
| C | 1.66943  | 1.07846  | 0.02972  |
| O | 1.07001  | 2.23308  | -0.08378 |
| C | 2.47266  | 0.62308  | -1.13247 |
| C | 2.71267  | -0.88505 | -1.05171 |
| O | 3.11803  | -1.25043 | 0.25241  |
| O | -0.72382 | 0.53173  | 1.11718  |
| H | 1.79729  | -1.41210 | -1.32903 |
| H | 3.42695  | 1.15977  | -1.10931 |
| C | -1.04668 | -0.02810 | 0.03494  |
| H | 0.36232  | 2.27985  | 0.58838  |
| O | -0.32815 | -0.41757 | -0.87594 |
| C | -2.58508 | -0.21711 | -0.11414 |
| H | 2.51723  | -1.32411 | 2.17515  |
| H | 1.24925  | -1.74641 | 1.00703  |
| F | -2.91116 | -0.79626 | -1.26173 |
| F | -3.06249 | -0.97289 | 0.87747  |
| F | -3.20633 | 0.96519  | -0.06108 |
| H | 3.52050  | -1.17511 | -1.71975 |
| H | 1.94609  | 0.89956  | -2.04576 |
| H | 1.28304  | 0.80030  | 2.12683  |

**F<sub>3</sub>Ac-TS5**

|   |          |          |          |
|---|----------|----------|----------|
| O | -3.26610 | -1.28276 | -0.27803 |
| C | -2.00566 | -1.35845 | -0.89918 |

|   |          |          |          |
|---|----------|----------|----------|
| C | -1.26118 | -0.04435 | -0.88066 |
| C | -1.77228 | 1.01042  | -0.10796 |
| C | -2.91416 | 0.81641  | 0.82758  |
| C | -3.19327 | -0.67263 | 0.99167  |
| O | 0.36216  | -0.56142 | 0.00256  |
| C | 1.28895  | 0.27946  | -0.20410 |
| C | 2.68719  | -0.26336 | 0.19448  |
| O | -1.21590 | 2.19918  | -0.12341 |
| O | 1.21176  | 1.40501  | -0.67922 |
| H | -2.40453 | -1.14345 | 1.59144  |
| H | -3.79569 | 1.32215  | 0.42177  |
| H | -0.29982 | 2.11893  | -0.50912 |
| H | -2.18589 | -1.66020 | -1.93031 |
| H | -1.38108 | -2.12065 | -0.42051 |
| F | 3.01697  | -1.28786 | -0.59464 |
| F | 3.62202  | 0.66604  | 0.07973  |
| F | 2.68168  | -0.69810 | 1.45355  |
| H | -4.15026 | -0.83952 | 1.48157  |
| H | -2.67616 | 1.29215  | 1.78126  |
| H | -0.70542 | 0.22488  | -1.76996 |

### **F<sub>3</sub>Ac-TS6**

|   |            |            |            |
|---|------------|------------|------------|
| C | -2.3111650 | -0.3724560 | -1.1138230 |
| C | -1.3154050 | 0.7306000  | -1.1388190 |
| C | -0.4259310 | 0.9186300  | -0.0325290 |
| O | 0.3565600  | 1.9472870  | -0.0552770 |
| C | -0.8163920 | 0.2847050  | 1.2729200  |
| C | -1.6234620 | -0.9853690 | 1.0413790  |
| O | -2.7180800 | -0.7167850 | 0.1863450  |
| O | 2.3125960  | 0.7686960  | 0.6647060  |
| H | -0.9867900 | -1.7646140 | 0.6101770  |

|   |            |            |            |
|---|------------|------------|------------|
| H | -1.4426950 | 1.0243340  | 1.7827080  |
| C | 2.0113600  | -0.2252880 | -0.0211670 |
| H | 1.2534990  | 1.6392530  | 0.4436490  |
| O | 0.8914820  | -0.5131570 | -0.4979360 |
| C | 3.1288470  | -1.2540540 | -0.3262740 |
| H | -3.2077200 | -0.0948480 | -1.6697760 |
| H | -1.8666420 | -1.2457730 | -1.6225500 |
| F | 4.2919350  | -0.8895300 | 0.1886570  |
| F | 2.8001640  | -2.4432680 | 0.1833410  |
| F | 3.2776200  | -1.3977960 | -1.6421380 |
| H | -2.0441100 | -1.3491490 | 1.9764390  |
| H | 0.0661310  | 0.1134440  | 1.8886680  |
| H | -1.1320730 | 1.2969680  | -2.0412200 |

**F<sub>3</sub>Ac-IV**

|   |          |          |          |
|---|----------|----------|----------|
| O | 3.90789  | -1.10893 | 0.17258  |
| C | 2.66319  | -1.47621 | 0.70791  |
| C | 1.72698  | -0.33518 | 0.87072  |
| C | 1.95080  | 0.92612  | 0.23714  |
| C | 3.23433  | 1.09020  | -0.53580 |
| C | 3.77768  | -0.26909 | -0.95706 |
| O | -1.37156 | 1.20307  | 0.59142  |
| C | -1.58467 | 0.13495  | -0.12996 |
| C | -3.08311 | -0.24297 | -0.10723 |
| O | 1.12726  | 1.84603  | 0.30469  |
| O | -0.78241 | -0.51838 | -0.73560 |
| H | 3.11203  | -0.73494 | -1.69520 |
| H | 3.96010  | 1.58898  | 0.11225  |
| H | -0.40097 | 1.47813  | 0.54273  |
| H | 2.85450  | -1.95614 | 1.67058  |
| H | 2.17050  | -2.22855 | 0.06773  |

|   |          |          |          |
|---|----------|----------|----------|
| F | -3.30700 | -1.31953 | -0.84234 |
| F | -3.47534 | -0.49801 | 1.14164  |
| F | -3.82717 | 0.75392  | -0.58025 |
| H | 4.76888  | -0.17852 | -1.39640 |
| H | 3.04313  | 1.74108  | -1.38881 |
| H | 0.81664  | -0.47865 | 1.43667  |

**F<sub>3</sub>Ac-VI**

|   |          |          |          |
|---|----------|----------|----------|
| C | -0.29275 | -0.90375 | 0.00000  |
| O | -1.41425 | -1.29532 | 0.00000  |
| O | 0.80814  | -1.64751 | 0.00000  |
| H | 0.54664  | -2.58050 | 0.00000  |
| C | 0.08636  | 0.59235  | 0.00000  |
| F | 0.80814  | 0.88492  | 1.07914  |
| F | 0.80814  | 0.88492  | -1.07914 |
| F | -1.00067 | 1.34033  | 0.00000  |

**F<sub>3</sub>Ac-VIII**

|   |          |          |          |
|---|----------|----------|----------|
| C | -0.21913 | -1.03677 | 0.00000  |
| O | -1.41902 | -1.32393 | 0.00000  |
| O | 0.81261  | -1.71640 | 0.00000  |
| C | 0.08903  | 0.50768  | 0.00000  |
| F | 0.81261  | 0.88061  | 1.07794  |
| F | 0.81261  | 0.88061  | -1.07794 |
| F | -0.99947 | 1.29402  | 0.00000  |

**7.7 Tosyl**

**Ts-I**



|   |          |          |          |
|---|----------|----------|----------|
| C | -3.90006 | 0.83577  | -0.28600 |
| C | -3.35396 | 0.75135  | 0.99767  |
| C | -2.19611 | 0.03659  | 1.23457  |
| C | -1.56799 | -0.60189 | 0.16990  |
| C | -2.08776 | -0.53753 | -1.11164 |
| C | -3.25463 | 0.18363  | -1.33016 |
| S | -0.07890 | -1.48666 | 0.47887  |
| C | -5.16890 | 1.60650  | -0.51484 |
| O | 0.96437  | -0.34639 | 0.74261  |
| C | 1.48431  | 0.41845  | -0.43396 |
| C | 1.53663  | 1.87953  | -0.01610 |
| O | 2.62370  | 2.16310  | 0.82107  |
| C | 3.85975  | 1.91294  | 0.17916  |
| C | 4.02355  | 0.43094  | -0.12717 |
| C | 2.81320  | -0.08910 | -0.81900 |
| O | 2.92734  | -1.32583 | -1.34382 |
| O | 0.28726  | -2.16317 | -0.73818 |
| H | 4.63596  | 2.26335  | 0.85667  |
| H | 4.90666  | 0.26062  | -0.74696 |
| H | 2.06010  | -1.76310 | -1.38909 |
| H | 1.58774  | 2.48830  | -0.92927 |
| H | 0.62865  | 2.13360  | 0.52996  |
| H | 3.91314  | 2.49810  | -0.74874 |
| H | 4.17453  | -0.12000 | 0.81103  |
| H | 0.75517  | 0.29182  | -1.23872 |
| H | -1.77899 | -0.04016 | 2.23050  |
| H | -1.59099 | -1.05859 | -1.91921 |
| H | -3.85169 | 1.25059  | 1.82044  |
| H | -3.66994 | 0.23396  | -2.32902 |
| H | -5.07973 | 2.62327  | -0.13021 |
| H | -5.41530 | 1.65991  | -1.57372 |
| H | -6.00352 | 1.13303  | 0.00521  |

|   |          |          |         |
|---|----------|----------|---------|
| O | -0.19486 | -2.20661 | 1.69765 |
|---|----------|----------|---------|

**Ts-III**

|   |          |          |          |
|---|----------|----------|----------|
| C | -2.90593 | 1.27303  | -0.58127 |
| C | -2.21294 | 0.24946  | 0.30085  |
| C | -1.23625 | 0.91353  | 1.21000  |
| C | -0.44959 | 2.07293  | 0.69629  |
| O | -1.24419 | 2.95333  | -0.07506 |
| C | -1.90345 | 2.27911  | -1.12617 |
| O | -3.15899 | -0.50756 | 0.94632  |
| O | -1.49288 | -0.61627 | -0.69299 |
| S | -0.52233 | -1.75707 | -0.21166 |
| O | -0.91429 | -2.16441 | 1.10921  |
| C | 1.03484  | -0.94392 | -0.09980 |
| C | 1.61715  | -0.72325 | 1.13580  |
| C | 2.82016  | -0.03341 | 1.19994  |
| C | 3.44019  | 0.43646  | 0.04639  |
| C | 2.83355  | 0.19119  | -1.18760 |
| C | 1.63856  | -0.49947 | -1.26987 |
| C | 4.74801  | 1.17240  | 0.11217  |
| O | -0.47220 | -2.69642 | -1.27672 |
| H | -1.16849 | 1.77480  | -1.76773 |
| H | -3.64035 | 1.78603  | 0.04071  |
| H | -2.70664 | -1.19886 | 1.45229  |
| H | -0.04047 | 2.65532  | 1.52084  |
| H | 0.39857  | 1.72224  | 0.08283  |
| H | -2.40951 | 3.04168  | -1.71574 |
| H | -3.42548 | 0.74640  | -1.38191 |
| H | -1.09689 | 0.52640  | 2.20836  |
| H | 1.12897  | -1.08730 | 2.02992  |
| H | 1.17115  | -0.69609 | -2.22636 |

|   |         |         |          |
|---|---------|---------|----------|
| H | 3.28330 | 0.14200 | 2.16314  |
| H | 3.30927 | 0.54676 | -2.09370 |
| H | 4.99241 | 1.45579 | 1.13439  |
| H | 5.55730 | 0.54561 | -0.26747 |
| H | 4.71884 | 2.07460 | -0.49932 |

**Ts-TS2**

|   |          |          |          |
|---|----------|----------|----------|
| C | -4.50495 | 0.07186  | -0.19176 |
| C | -3.74962 | 1.13053  | 0.31450  |
| C | -2.38234 | 1.01159  | 0.48894  |
| C | -1.75303 | -0.17945 | 0.15144  |
| C | -2.48061 | -1.24443 | -0.34936 |
| C | -3.85286 | -1.11159 | -0.51898 |
| S | 0.00392  | -0.32176 | 0.34071  |
| O | 0.34864  | 0.36687  | 1.57838  |
| C | 2.89100  | 0.69741  | 0.98486  |
| C | 2.74916  | 1.18565  | -0.32492 |
| O | 0.57806  | 0.38416  | -0.82499 |
| C | 3.40136  | -0.67990 | 1.20540  |
| O | 4.09868  | -1.18316 | 0.09343  |
| C | 3.34555  | -1.08045 | -1.10122 |
| C | 3.22085  | 0.39106  | -1.49063 |
| O | 0.32380  | -1.73449 | 0.33247  |
| O | 2.38008  | 2.42989  | -0.45425 |
| C | -5.99372 | 0.20994  | -0.35101 |
| H | 2.35198  | -1.51824 | -0.97264 |
| H | 4.20629  | 0.78517  | -1.76631 |
| H | 2.14038  | 2.62314  | -1.37241 |
| H | 4.08838  | -0.68983 | 2.05358  |
| H | 2.53557  | -1.31115 | 1.46155  |
| H | 3.89407  | -1.62770 | -1.86434 |

|   |          |          |          |
|---|----------|----------|----------|
| H | 2.53200  | 0.52797  | -2.32455 |
| H | 2.59264  | 1.32223  | 1.81237  |
| H | -1.79749 | 1.82607  | 0.89639  |
| H | -1.97040 | -2.16740 | -0.59051 |
| H | -4.24567 | 2.05722  | 0.57980  |
| H | -4.42588 | -1.94468 | -0.90856 |
| H | -6.48844 | 0.20018  | 0.62244  |
| H | -6.25015 | 1.15144  | -0.83819 |
| H | -6.40479 | -0.60591 | -0.94392 |

**Ts-TS3**

|   |          |          |          |
|---|----------|----------|----------|
| S | -0.37161 | 1.79988  | -0.11239 |
| O | -0.95904 | 1.62402  | -1.42444 |
| C | -3.00744 | -0.45302 | 0.59601  |
| C | -1.88782 | -1.08138 | 1.12790  |
| O | -1.17503 | 1.11542  | 0.94560  |
| C | -3.29571 | -0.57325 | -0.85477 |
| O | -2.65767 | -1.69214 | -1.42277 |
| C | -1.26066 | -1.64795 | -1.21193 |
| C | -0.94747 | -1.85434 | 0.27191  |
| O | -1.74039 | -1.08383 | 2.43011  |
| H | -0.86402 | -0.69027 | -1.55261 |
| H | -1.06082 | -2.90979 | 0.54407  |
| H | -0.86600 | -1.41518 | 2.67917  |
| H | -4.36823 | -0.69309 | -1.01547 |
| H | -2.97156 | 0.36163  | -1.34073 |
| H | -0.82323 | -2.45090 | -1.80183 |
| H | 0.07966  | -1.55108 | 0.50164  |
| H | -3.62575 | 0.14879  | 1.24618  |
| C | 1.14193  | 0.85860  | -0.11693 |
| C | 1.79201  | 0.62737  | 1.09182  |

|   |          |          |          |
|---|----------|----------|----------|
| C | 1.65025  | 0.33115  | -1.29076 |
| C | 2.93759  | -0.14894 | 1.11713  |
| H | 1.39116  | 1.05966  | 2.00092  |
| C | 2.80275  | -0.44685 | -1.25393 |
| H | 1.13920  | 0.52980  | -2.22403 |
| C | 3.45984  | -0.70101 | -0.05530 |
| H | 3.44503  | -0.32730 | 2.05843  |
| H | 3.19777  | -0.85995 | -2.17426 |
| C | 4.72202  | -1.51654 | -0.01713 |
| H | 5.59522  | -0.86660 | 0.06602  |
| H | 4.73240  | -2.18834 | 0.84125  |
| H | 4.83517  | -2.11211 | -0.92194 |
| O | -0.03535 | 3.13830  | 0.27929  |

#### Ts-TS5

|   |          |          |          |
|---|----------|----------|----------|
| C | 4.25125  | -0.82467 | -0.33639 |
| C | 3.28193  | -1.44943 | 0.45173  |
| C | 2.05693  | -0.85272 | 0.68013  |
| C | 1.79388  | 0.38753  | 0.11127  |
| C | 2.73517  | 1.03002  | -0.67279 |
| C | 3.96168  | 0.41674  | -0.89096 |
| S | 0.23074  | 1.14958  | 0.38075  |
| O | 0.29744  | 2.51744  | -0.03942 |
| C | 5.58036  | -1.48831 | -0.56245 |
| O | -0.70358 | 0.33272  | -0.49139 |
| C | -2.49117 | 0.60775  | -0.01445 |
| C | -3.16503 | 0.65262  | -1.35554 |
| O | -3.53675 | -0.61531 | -1.82560 |
| C | -4.34320 | -1.30332 | -0.89453 |
| C | -3.53063 | -1.66780 | 0.34052  |
| C | -2.76220 | -0.48980 | 0.82708  |

|   |          |          |          |
|---|----------|----------|----------|
| O | -2.23447 | -0.58610 | 2.02641  |
| O | -0.13067 | 0.93625  | 1.78062  |
| H | -4.71432 | -2.19492 | -1.39556 |
| H | -4.16619 | -2.04085 | 1.14646  |
| H | -1.47193 | 0.05510  | 2.11404  |
| H | -4.04965 | 1.30150  | -1.26707 |
| H | -2.48763 | 1.09119  | -2.08550 |
| H | -5.20214 | -0.67934 | -0.61352 |
| H | -2.81610 | -2.46186 | 0.09655  |
| H | -2.32319 | 1.57141  | 0.45502  |
| H | 1.30924  | -1.33150 | 1.29921  |
| H | 2.50594  | 1.99943  | -1.09425 |
| H | 3.49807  | -2.41507 | 0.89345  |
| H | 4.70544  | 0.91494  | -1.50058 |
| H | 5.44869  | -2.48870 | -0.97730 |
| H | 6.19917  | -0.91224 | -1.24823 |
| H | 6.12315  | -1.59405 | 0.37856  |

### Ts-TS6

|   |          |          |          |
|---|----------|----------|----------|
| C | -3.17842 | 1.07590  | -0.44339 |
| C | -2.39077 | 0.27087  | 0.53530  |
| C | -1.28069 | 0.89917  | 1.17988  |
| C | -0.67776 | 2.12222  | 0.58481  |
| O | -1.60413 | 2.88239  | -0.15143 |
| C | -2.28546 | 2.10847  | -1.11972 |
| O | -3.02484 | -0.72238 | 1.10155  |
| O | -1.34128 | -0.71369 | -0.83531 |
| S | -0.39706 | -1.75189 | -0.28916 |
| O | -0.79808 | -2.11386 | 1.06709  |
| C | 1.13725  | -0.87827 | -0.13058 |
| C | 1.74367  | -0.72153 | 1.10272  |

|   |          |          |          |
|---|----------|----------|----------|
| C | 2.91851  | 0.01650  | 1.19728  |
| C | 3.49391  | 0.59580  | 0.07243  |
| C | 2.86782  | 0.41552  | -1.16354 |
| C | 1.70031  | -0.31730 | -1.27195 |
| C | 4.77343  | 1.37844  | 0.16625  |
| O | -0.20583 | -2.81643 | -1.22123 |
| H | -1.56883 | 1.60439  | -1.77602 |
| H | -3.97105 | 1.57685  | 0.12032  |
| H | -2.35587 | -1.35263 | 1.46640  |
| H | -0.28104 | 2.76823  | 1.36884  |
| H | 0.17144  | 1.81633  | -0.05166 |
| H | -2.88151 | 2.80248  | -1.70835 |
| H | -3.63718 | 0.39596  | -1.15940 |
| H | -0.80585 | 0.40366  | 2.01504  |
| H | 1.29888  | -1.18004 | 1.97643  |
| H | 1.21809  | -0.45679 | -2.23152 |
| H | 3.39609  | 0.13793  | 2.16214  |
| H | 3.30763  | 0.85659  | -2.05045 |
| H | 5.03439  | 1.58807  | 1.20233  |
| H | 5.59733  | 0.82006  | -0.28243 |
| H | 4.69274  | 2.32604  | -0.36740 |

**Ts-IV**

|   |          |          |          |
|---|----------|----------|----------|
| C | -0.99486 | -2.32171 | 0.29278  |
| C | -0.54714 | -1.57916 | 1.38182  |
| C | 0.61704  | -0.82546 | 1.30549  |
| C | 1.33790  | -0.81727 | 0.12349  |
| C | 0.92638  | -1.56768 | -0.97098 |
| C | -0.23603 | -2.31364 | -0.87936 |
| S | 2.76210  | 0.22097  | -0.02365 |
| O | 3.67941  | -0.38115 | -0.93042 |

|   |          |          |          |
|---|----------|----------|----------|
| C | -2.27200 | -3.11116 | 0.36256  |
| O | 2.17562  | 1.46790  | -0.77016 |
| C | -1.09887 | 1.20824  | -1.09108 |
| C | -2.39405 | 0.67968  | -1.59261 |
| O | -3.49632 | 1.06724  | -0.81418 |
| C | -3.26619 | 0.86770  | 0.56642  |
| C | -2.21220 | 1.84438  | 1.06972  |
| C | -0.97932 | 1.81503  | 0.20026  |
| O | 0.08411  | 2.30043  | 0.59970  |
| O | 3.16237  | 0.59981  | 1.29225  |
| H | -2.94325 | -0.16666 | 0.74231  |
| H | -2.60831 | 2.86311  | 1.04888  |
| H | 1.47740  | 1.91678  | -0.21085 |
| H | -2.57769 | 1.03362  | -2.61015 |
| H | -2.32133 | -0.42065 | -1.64400 |
| H | -4.21884 | 1.02208  | 1.06906  |
| H | -1.91092 | 1.62972  | 2.09607  |
| H | -0.21599 | 1.13485  | -1.71331 |
| H | 0.96854  | -0.24260 | 2.14700  |
| H | 1.52391  | -1.56546 | -1.87399 |
| H | -1.11301 | -1.59530 | 2.30619  |
| H | -0.56110 | -2.90616 | -1.72702 |
| H | -2.11536 | -4.13848 | 0.03213  |
| H | -2.66960 | -3.13397 | 1.37609  |
| H | -3.03356 | -2.67386 | -0.28854 |

**Ts-VI**

|   |         |          |          |
|---|---------|----------|----------|
| O | 2.34558 | -1.30365 | 0.48457  |
| O | 2.28617 | 0.23071  | -1.39995 |
| H | 2.41168 | -0.62925 | -1.82526 |
| C | 0.13049 | -0.00682 | 0.07471  |



|   |          |          |          |
|---|----------|----------|----------|
| C | -0.54991 | 1.20398  | 0.03287  |
| C | -0.54891 | -1.21355 | 0.07795  |
| C | -1.93112 | 1.19318  | -0.01855 |
| H | 0.00408  | 2.13317  | 0.05180  |
| C | -1.93565 | -1.20433 | 0.02915  |
| H | 0.00398  | -2.14170 | 0.13487  |
| C | -2.64326 | -0.00779 | -0.02162 |
| H | -2.47175 | 2.13155  | -0.05097 |
| H | -2.47521 | -2.14326 | 0.03669  |
| C | -4.14506 | 0.00578  | -0.05616 |
| H | -4.54723 | -0.99391 | -0.21055 |
| H | -4.54545 | 0.39073  | 0.88362  |
| H | -4.50979 | 0.65175  | -0.85545 |
| S | 1.88851  | 0.00101  | 0.12499  |
| O | 2.32501  | 1.16820  | 0.80606  |

#### Ts-VIII

|   |          |          |          |
|---|----------|----------|----------|
| O | 2.35137  | 1.35478  | -0.35742 |
| O | 2.29577  | -0.36891 | 1.37149  |
| C | 0.17196  | 0.01643  | -0.02122 |
| C | -0.52590 | -1.18682 | -0.01836 |
| C | -0.53077 | 1.20856  | -0.01774 |
| C | -1.91023 | -1.18969 | -0.00481 |
| H | 0.03611  | -2.11237 | -0.03762 |
| C | -1.92266 | 1.19985  | -0.00468 |
| H | 0.02884  | 2.13506  | -0.03414 |
| C | -2.63140 | 0.00539  | 0.00352  |
| H | -2.44793 | -2.13286 | -0.00453 |
| H | -2.46605 | 2.13926  | -0.00394 |
| C | -4.13709 | -0.01296 | 0.01278  |
| H | -4.53218 | -0.50623 | -0.87842 |

|   |          |          |          |
|---|----------|----------|----------|
| H | -4.52038 | -0.55499 | 0.88029  |
| H | -4.54134 | 0.99917  | 0.04304  |
| S | 1.97236  | -0.00080 | 0.00354  |
| O | 2.32808  | -1.01070 | -0.97886 |

## 8.0 References

1. Gaussian 09, R. D.01, M. J. Frisch, G. W. Trucks, H. B. Schlegel, G. E. Scuseria, M. A. Robb, J. R. Cheeseman, G. Scalmani, V. Barone, B. Mennucci, G. A. Petersson, H. Nakatsuji, M. Caricato, X. Li, H. P. Hratchian, A. F. Izmaylov, J. Bloino, G. Zheng, J. L. Sonnenberg, M. Hada, M. Ehara, K. Toyota, R. Fukuda, J. Hasegawa, M. Ishida, T. Nakajima, Y. Honda, O. Kitao, H. Nakai, T. Vreven, J. A. Montgomery Jr., J. E. Peralta, F. Ogliaro, M. Bearpark, J. J. Heyd, E. Brothers, K. N. Kudin, V. N. Staroverov, R. Kobayashi, J. Normand, K. Raghavachari, A. Rendell, J. C. Burant, S. S. Iyengar, J. Tomasi, M. Cossi, N. Rega, J. M. Millam, M. Klene, J. E. Knox, J. B. Cross, V. Bakken, C. Adamo, J. Jaramillo, R. Gomperts, R. E. Stratmann, O. Yazyev, A. J. Austin, R. Cammi, C. Pomelli, J. W. Ochterski, R. L. Martin, K. Morokuma, V. G. Zakrzewski, G. A. Voth, P. Salvador, J. J. Dannenberg, S. Dapprich, A. D. Daniels, Ö. Farkas, J. B. Foresman, J. V. Ortiz, J. Cioslowski, D. J. Fox, Gaussian, Inc., W. CT, 2010.
2. Y. Zhao, D. G. Truhlar, *Theor. Chem. Acc.* 2008, **120**, 215–241.
3. Weigend, F.; Ahlrichs, R. Balanced basis sets of split valence, triple zeta valence and quadruple zeta valence quality for H to Rn: Design and assessment of accuracy. *Phys. Chem. Chem. Phys.* 2005, **7**, 3297-3305.
4. G. Luchini, J. V. Alegre-Requena, I. Funes-Ardoiz, and R. S. Paton, *FI000Research* **2020**, 9(Chem Inf Sci):291.
5. A. V. Marenich, C. J. Cramer, D. G. Truhlar, *J. Phys. Chem. B* 2009, **113**, 6378-6396.
6. Schrödinger Release 2019-2: Jaguar, Schrödinger, LLC, New York, NY, 2019
7. Neese, F. Software update: the ORCA program system, version 4.0. *Wiley Interdisciplinary Reviews-Computational Molecular Science* 2018, **8**.
8. H. Zipse and M. Bootz, *J. Chem. Soc., Perkin Trans.* 2001, 1566 - 1572.
9. J. Turner, N. Rosano, D. J. Gorelik and M. S. Taylor, *ACS Catal.* 2021, **11**, 11171 - 11179.
10. A. Kütt, S. Tshepelevitsh, J. Saame, M. Lõkov, I. Kaljurand, S. Selberg and I Leito, *Eur. J. Org. Chem.*, 2021, 1407–1419.
11. R. S. Mancini, J. B. Lee and M. S. Taylor, *Org. Biomol. Chem.*, 2017, **15**, 132–143.
12. D. I. Batovska, S. Tsubota, Y. Kato, Y. Asano and M. Ubukata, *Tetrahedron: Asymmetry*, 2004, **15**, 3551–3559.
13. D. Lee and M. S. Taylor, *J. Am. Chem. Soc.*, 2011, **133**, 3724–3727.
14. J. Bálint, G. Egri, A. Kolbert, C. Dianóczky, E. Fogassy, L. Novák and L. Poppe, *Tetrahedron: Asymmetry*, 1999, **10**, 4017–4028.
15. P. Vertesaljai, P. V. Navaratne and A. J. Grenning, *Angew. Chem. Int. Ed.* 2016, **55**, 317–320.
16. F. Li, N. Wang and G. Zhu, *J. Org. Chem.* 2015, **80**, 3538–3546.
17. P. S. Kumar, R. Ravikumar, K. C. Ashalu and K. R. Reddy, *Tetrahedron Letters*. 2018, **59**, 33–37.
18. C. R. Reddy, A. D. Patil and S. Z. Mohammed, *Chem. Commun.*, 2020, **56**, 7191–7194.
